# Supplementary material
Source: Research Square preprint supplement (doi:10.21203/rs.3.rs-9228088/v1)
Supplement: Supplementary file 1 [file 0490d6d5a7b03eec55c55150.xlsx]

## Sheet: Sheet1
MGS	Location	Kingdom	Phylum	Class	Family	Genus	Species
MGS.0_1	Illeum	Bacteria	Bacteroidota	Bacteroidia	Bacteroidaceae	Phocaeicola	Phocaeicola coprophilus
MGS.10_1	Illeum	Bacteria	Firmicutes_A	Clostridia	UBA1381	CAG-41	CAG-41 sp900066215
MGS.103_1	Illeum	Bacteria	Firmicutes_A	Clostridia	Lachnospiraceae	Stomatobaculum	Stomatobaculum longum_A
MGS.103_10	Illeum	Bacteria	Firmicutes_A	Clostridia	Lachnospiraceae	Stomatobaculum	Stomatobaculum longum_A
MGS.103_12	Illeum	Bacteria	Firmicutes_A	Clostridia	Lachnospiraceae	Stomatobaculum	Stomatobaculum longum_A
MGS.103_13	Illeum	Bacteria	Firmicutes_A	Clostridia	Lachnospiraceae	Stomatobaculum	Stomatobaculum longum_A
MGS.103_2	Illeum	Bacteria	Firmicutes_A	Clostridia	Lachnospiraceae	Stomatobaculum	Stomatobaculum longum_A
MGS.103_4	Illeum	Bacteria	Firmicutes_A	Clostridia	Lachnospiraceae	Stomatobaculum	Stomatobaculum longum_A
MGS.103_9	Illeum	Bacteria	Firmicutes_A	Clostridia	Lachnospiraceae	Stomatobaculum	Stomatobaculum longum_A
MGS.104_1	Illeum	Bacteria	Firmicutes	Bacilli	Lactobacillaceae	Ligilactobacillus	Ligilactobacillus salivarius
MGS.105_1	Illeum	Bacteria	Firmicutes_A	Clostridia	CAG-74	UBA11524	UBA11524 sp000437595
MGS.105_3	Illeum	Bacteria	Firmicutes_A	Clostridia	CAG-74	UBA11524	UBA11524 sp000437595
MGS.106_1	Illeum	Bacteria	Bacteroidota	Bacteroidia	Bacteroidaceae	Prevotella	Prevotella rara
MGS.107_3	Illeum	Bacteria	Firmicutes_A	Clostridia	Lachnospiraceae	Roseburia	Roseburia intestinalis
MGS.107_4	Illeum	Bacteria	Firmicutes_A	Clostridia	Lachnospiraceae	Roseburia	Roseburia intestinalis
MGS.108_1	Illeum	Bacteria	Bacteroidota	Bacteroidia	Tannerellaceae	Parabacteroides	Parabacteroides distasonis
MGS.108_5	Illeum	Bacteria	Bacteroidota	Bacteroidia	Tannerellaceae	Parabacteroides	Parabacteroides distasonis
MGS.108_6	Illeum	Bacteria	Bacteroidota	Bacteroidia	Tannerellaceae	Parabacteroides	Parabacteroides distasonis
MGS.108_7	Illeum	Bacteria	Bacteroidota	Bacteroidia	Tannerellaceae	Parabacteroides	Parabacteroides distasonis
MGS.108_8	Illeum	Bacteria	Bacteroidota	Bacteroidia	Tannerellaceae	Parabacteroides	Parabacteroides distasonis
MGS.108_9	Illeum	Bacteria	Bacteroidota	Bacteroidia	Tannerellaceae	Parabacteroides	Parabacteroides distasonis
MGS.109_1	Illeum	Bacteria	Bacteroidota	Bacteroidia	Marinifilaceae	Odoribacter	Odoribacter splanchnicus
MGS.11_1	Illeum	Bacteria	Firmicutes_C	Negativicutes	Dialisteraceae	Dialister	Dialister succinatiphilus
MGS.110_10	Illeum	Bacteria	Firmicutes_A	Clostridia	Anaerovoracaceae	Eubacterium_N	Eubacterium_N saphenum
MGS.110_2	Illeum	Bacteria	Firmicutes_A	Clostridia	Anaerovoracaceae	Eubacterium_N	Eubacterium_N saphenum
MGS.110_3	Illeum	Bacteria	Firmicutes_A	Clostridia	Anaerovoracaceae	Eubacterium_N	Eubacterium_N saphenum
MGS.111_4	Illeum	Bacteria	Bacteroidota	Bacteroidia	Bacteroidaceae	Prevotella	Prevotella histicola
MGS.111_6	Illeum	Bacteria	Bacteroidota	Bacteroidia	Bacteroidaceae	Prevotella	Prevotella histicola
MGS.111_9	Illeum	Bacteria	Bacteroidota	Bacteroidia	Bacteroidaceae	Prevotella	Prevotella histicola
MGS.112_1	Illeum	Bacteria	Firmicutes_A	Clostridia	Lachnospiraceae	Schaedlerella	Schaedlerella sp900066545
MGS.112_2	Illeum	Bacteria	Firmicutes_A	Clostridia	Lachnospiraceae	Schaedlerella	Schaedlerella sp900066545
MGS.113_1	Illeum	Bacteria	Bacteroidota	Bacteroidia	Bacteroidaceae	Bacteroides	Bacteroides uniformis
MGS.113_3	Illeum	Bacteria	Bacteroidota	Bacteroidia	Bacteroidaceae	Bacteroides	Bacteroides uniformis
MGS.113_5	Illeum	Bacteria	Bacteroidota	Bacteroidia	Bacteroidaceae	Bacteroides	Bacteroides uniformis
MGS.113_7	Illeum	Bacteria	Bacteroidota	Bacteroidia	Bacteroidaceae	Bacteroides	Bacteroides uniformis
MGS.113_8	Illeum	Bacteria	Bacteroidota	Bacteroidia	Bacteroidaceae	Bacteroides	Bacteroides uniformis
MGS.115_3	Illeum	Bacteria	Firmicutes_A	Clostridia	Lachnospiraceae	Mediterraneibacter	Mediterraneibacter faecis
MGS.115_4	Illeum	Bacteria	Firmicutes_A	Clostridia	Lachnospiraceae	Mediterraneibacter	Mediterraneibacter faecis
MGS.115_5	Illeum	Bacteria	Firmicutes_A	Clostridia	Lachnospiraceae	Mediterraneibacter	Mediterraneibacter faecis
MGS.115_6	Illeum	Bacteria	Firmicutes_A	Clostridia	Lachnospiraceae	Mediterraneibacter	Mediterraneibacter faecis
MGS.115_8	Illeum	Bacteria	Firmicutes_A	Clostridia	Lachnospiraceae	Mediterraneibacter	Mediterraneibacter faecis
MGS.116_1	Illeum	Bacteria	Firmicutes	Bacilli	Coprobacillaceae	Beduini	Beduini sp900550005
MGS.116_4	Illeum	Bacteria	Firmicutes	Bacilli	Coprobacillaceae	Beduini	Beduini sp900550005
MGS.118_1	Illeum	Bacteria	Firmicutes_A	Clostridia	Acutalibacteraceae	Ruminococcus_E	Ruminococcus_E bromii_B
MGS.118_4	Illeum	Bacteria	Firmicutes_A	Clostridia	Acutalibacteraceae	Ruminococcus_E	Ruminococcus_E bromii_B
MGS.119_13	Illeum	Bacteria	Firmicutes	Bacilli	Aerococcaceae	Granulicatella	?
MGS.119_15	Illeum	Bacteria	Firmicutes	Bacilli	Aerococcaceae	Granulicatella	?
MGS.119_16	Illeum	Bacteria	Firmicutes	Bacilli	Aerococcaceae	Granulicatella	?
MGS.119_17	Illeum	Bacteria	Firmicutes	Bacilli	Aerococcaceae	Granulicatella	?
MGS.119_19	Illeum	Bacteria	Firmicutes	Bacilli	Aerococcaceae	Granulicatella	?
MGS.119_2	Illeum	Bacteria	Firmicutes	Bacilli	Aerococcaceae	Granulicatella	?
MGS.119_21	Illeum	Bacteria	Firmicutes	Bacilli	Aerococcaceae	Granulicatella	?
MGS.119_5	Illeum	Bacteria	Firmicutes	Bacilli	Aerococcaceae	Granulicatella	?
MGS.120_1	Illeum	Bacteria	Firmicutes_A	Clostridia	Peptoniphilaceae	Parvimonas	Parvimonas sp015257355
MGS.120_22	Illeum	Bacteria	Firmicutes_A	Clostridia	Peptoniphilaceae	Parvimonas	Parvimonas sp015257355
MGS.120_24	Illeum	Bacteria	Firmicutes_A	Clostridia	Peptoniphilaceae	Parvimonas	Parvimonas sp015257355
MGS.120_3	Illeum	Bacteria	Firmicutes_A	Clostridia	Peptoniphilaceae	Parvimonas	Parvimonas sp015257355
MGS.121_1	Illeum	Bacteria	Firmicutes_A	Clostridia	Peptoniphilaceae	Parvimonas	Parvimonas sp001553085
MGS.121_10	Illeum	Bacteria	Firmicutes_A	Clostridia	Peptoniphilaceae	Parvimonas	Parvimonas sp001553085
MGS.121_11	Illeum	Bacteria	Firmicutes_A	Clostridia	Peptoniphilaceae	Parvimonas	Parvimonas sp001553085
MGS.121_12	Illeum	Bacteria	Firmicutes_A	Clostridia	Peptoniphilaceae	Parvimonas	Parvimonas sp001553085
MGS.121_13	Illeum	Bacteria	Firmicutes_A	Clostridia	Peptoniphilaceae	Parvimonas	Parvimonas sp001553085
MGS.121_14	Illeum	Bacteria	Firmicutes_A	Clostridia	Peptoniphilaceae	Parvimonas	Parvimonas sp001553085
MGS.121_15	Illeum	Bacteria	Firmicutes_A	Clostridia	Peptoniphilaceae	Parvimonas	Parvimonas sp001553085
MGS.121_16	Illeum	Bacteria	Firmicutes_A	Clostridia	Peptoniphilaceae	Parvimonas	Parvimonas sp001553085
MGS.121_17	Illeum	Bacteria	Firmicutes_A	Clostridia	Peptoniphilaceae	Parvimonas	Parvimonas sp001553085
MGS.121_18	Illeum	Bacteria	Firmicutes_A	Clostridia	Peptoniphilaceae	Parvimonas	Parvimonas sp001553085
MGS.121_19	Illeum	Bacteria	Firmicutes_A	Clostridia	Peptoniphilaceae	Parvimonas	Parvimonas sp001553085
MGS.121_2	Illeum	Bacteria	Firmicutes_A	Clostridia	Peptoniphilaceae	Parvimonas	Parvimonas sp001553085
MGS.121_20	Illeum	Bacteria	Firmicutes_A	Clostridia	Peptoniphilaceae	Parvimonas	Parvimonas sp001553085
MGS.121_23	Illeum	Bacteria	Firmicutes_A	Clostridia	Peptoniphilaceae	Parvimonas	Parvimonas sp001553085
MGS.121_25	Illeum	Bacteria	Firmicutes_A	Clostridia	Peptoniphilaceae	Parvimonas	Parvimonas sp001553085
MGS.121_3	Illeum	Bacteria	Firmicutes_A	Clostridia	Peptoniphilaceae	Parvimonas	Parvimonas sp001553085
MGS.121_4	Illeum	Bacteria	Firmicutes_A	Clostridia	Peptoniphilaceae	Parvimonas	Parvimonas sp001553085
MGS.121_5	Illeum	Bacteria	Firmicutes_A	Clostridia	Peptoniphilaceae	Parvimonas	Parvimonas sp001553085
MGS.121_6	Illeum	Bacteria	Firmicutes_A	Clostridia	Peptoniphilaceae	Parvimonas	Parvimonas sp001553085
MGS.121_7	Illeum	Bacteria	Firmicutes_A	Clostridia	Peptoniphilaceae	Parvimonas	Parvimonas sp001553085
MGS.121_8	Illeum	Bacteria	Firmicutes_A	Clostridia	Peptoniphilaceae	Parvimonas	Parvimonas sp001553085
MGS.121_9	Illeum	Bacteria	Firmicutes_A	Clostridia	Peptoniphilaceae	Parvimonas	Parvimonas sp001553085
MGS.122_2	Illeum	Bacteria	Proteobacteria	Gammaproteobacteria	Enterobacteriaceae	Klebsiella	Klebsiella aerogenes
MGS.122_4	Illeum	Bacteria	Proteobacteria	Gammaproteobacteria	Enterobacteriaceae	Klebsiella	Klebsiella aerogenes
MGS.122_8	Illeum	Bacteria	Proteobacteria	Gammaproteobacteria	Enterobacteriaceae	Klebsiella	Klebsiella aerogenes
MGS.122_9	Illeum	Bacteria	Proteobacteria	Gammaproteobacteria	Enterobacteriaceae	Klebsiella	Klebsiella aerogenes
MGS.123_1	Illeum	Bacteria	Firmicutes	Bacilli	Coprobacillaceae	Faecalibacillus	Faecalibacillus intestinalis
MGS.123_11	Illeum	Bacteria	Firmicutes	Bacilli	Coprobacillaceae	Faecalibacillus	Faecalibacillus intestinalis
MGS.123_12	Illeum	Bacteria	Firmicutes	Bacilli	Coprobacillaceae	Faecalibacillus	Faecalibacillus intestinalis
MGS.123_13	Illeum	Bacteria	Firmicutes	Bacilli	Coprobacillaceae	Faecalibacillus	Faecalibacillus intestinalis
MGS.123_14	Illeum	Bacteria	Firmicutes	Bacilli	Coprobacillaceae	Faecalibacillus	Faecalibacillus intestinalis
MGS.123_3	Illeum	Bacteria	Firmicutes	Bacilli	Coprobacillaceae	Faecalibacillus	Faecalibacillus intestinalis
MGS.123_4	Illeum	Bacteria	Firmicutes	Bacilli	Coprobacillaceae	Faecalibacillus	Faecalibacillus intestinalis
MGS.123_5	Illeum	Bacteria	Firmicutes	Bacilli	Coprobacillaceae	Faecalibacillus	Faecalibacillus intestinalis
MGS.123_7	Illeum	Bacteria	Firmicutes	Bacilli	Coprobacillaceae	Faecalibacillus	Faecalibacillus intestinalis
MGS.123_8	Illeum	Bacteria	Firmicutes	Bacilli	Coprobacillaceae	Faecalibacillus	Faecalibacillus intestinalis
MGS.123_9	Illeum	Bacteria	Firmicutes	Bacilli	Coprobacillaceae	Faecalibacillus	Faecalibacillus intestinalis
MGS.124_1	Illeum	Bacteria	Firmicutes_A	Clostridia	Lachnospiraceae	Copromonas	Copromonas sp900066785
MGS.124_2	Illeum	Bacteria	Firmicutes_A	Clostridia	Lachnospiraceae	Copromonas	Copromonas sp900066785
MGS.124_4	Illeum	Bacteria	Firmicutes_A	Clostridia	Lachnospiraceae	Copromonas	Copromonas sp900066785
MGS.124_5	Illeum	Bacteria	Firmicutes_A	Clostridia	Lachnospiraceae	Copromonas	Copromonas sp900066785
MGS.125_1	Illeum	Bacteria	Firmicutes_A	Clostridia	Peptostreptococcaceae	Intestinibacter	Intestinibacter bartlettii
MGS.125_10	Illeum	Bacteria	Firmicutes_A	Clostridia	Peptostreptococcaceae	Intestinibacter	Intestinibacter bartlettii
MGS.125_11	Illeum	Bacteria	Firmicutes_A	Clostridia	Peptostreptococcaceae	Intestinibacter	Intestinibacter bartlettii
MGS.125_13	Illeum	Bacteria	Firmicutes_A	Clostridia	Peptostreptococcaceae	Intestinibacter	Intestinibacter bartlettii
MGS.125_14	Illeum	Bacteria	Firmicutes_A	Clostridia	Peptostreptococcaceae	Intestinibacter	Intestinibacter bartlettii
MGS.125_15	Illeum	Bacteria	Firmicutes_A	Clostridia	Peptostreptococcaceae	Intestinibacter	Intestinibacter bartlettii
MGS.125_2	Illeum	Bacteria	Firmicutes_A	Clostridia	Peptostreptococcaceae	Intestinibacter	Intestinibacter bartlettii
MGS.125_3	Illeum	Bacteria	Firmicutes_A	Clostridia	Peptostreptococcaceae	Intestinibacter	Intestinibacter bartlettii
MGS.125_4	Illeum	Bacteria	Firmicutes_A	Clostridia	Peptostreptococcaceae	Intestinibacter	Intestinibacter bartlettii
MGS.125_5	Illeum	Bacteria	Firmicutes_A	Clostridia	Peptostreptococcaceae	Intestinibacter	Intestinibacter bartlettii
MGS.125_7	Illeum	Bacteria	Firmicutes_A	Clostridia	Peptostreptococcaceae	Intestinibacter	Intestinibacter bartlettii
MGS.125_8	Illeum	Bacteria	Firmicutes_A	Clostridia	Peptostreptococcaceae	Intestinibacter	Intestinibacter bartlettii
MGS.125_9	Illeum	Bacteria	Firmicutes_A	Clostridia	Peptostreptococcaceae	Intestinibacter	Intestinibacter bartlettii
MGS.126_1	Illeum	Bacteria	Firmicutes_A	Clostridia	Lachnospiraceae	Roseburia	Roseburia inulinivorans
MGS.126_2	Illeum	Bacteria	Firmicutes_A	Clostridia	Lachnospiraceae	Roseburia	Roseburia inulinivorans
MGS.126_4	Illeum	Bacteria	Firmicutes_A	Clostridia	Lachnospiraceae	Roseburia	Roseburia inulinivorans
MGS.126_5	Illeum	Bacteria	Firmicutes_A	Clostridia	Lachnospiraceae	Roseburia	Roseburia inulinivorans
MGS.126_6	Illeum	Bacteria	Firmicutes_A	Clostridia	Lachnospiraceae	Roseburia	Roseburia inulinivorans
MGS.126_8	Illeum	Bacteria	Firmicutes_A	Clostridia	Lachnospiraceae	Roseburia	Roseburia inulinivorans
MGS.126_9	Illeum	Bacteria	Firmicutes_A	Clostridia	Lachnospiraceae	Roseburia	Roseburia inulinivorans
MGS.127_10	Illeum	Bacteria	Firmicutes_A	Clostridia	Peptoniphilaceae	Parvimonas	Parvimonas micra
MGS.127_11	Illeum	Bacteria	Firmicutes_A	Clostridia	Peptoniphilaceae	Parvimonas	Parvimonas micra
MGS.127_12	Illeum	Bacteria	Firmicutes_A	Clostridia	Peptoniphilaceae	Parvimonas	Parvimonas micra
MGS.127_2	Illeum	Bacteria	Firmicutes_A	Clostridia	Peptoniphilaceae	Parvimonas	Parvimonas micra
MGS.127_3	Illeum	Bacteria	Firmicutes_A	Clostridia	Peptoniphilaceae	Parvimonas	Parvimonas micra
MGS.127_5	Illeum	Bacteria	Firmicutes_A	Clostridia	Peptoniphilaceae	Parvimonas	Parvimonas micra
MGS.127_6	Illeum	Bacteria	Firmicutes_A	Clostridia	Peptoniphilaceae	Parvimonas	Parvimonas micra
MGS.128_1	Illeum	Bacteria	Firmicutes_A	Clostridia	Lachnospiraceae	Agathobacter	?
MGS.128_10	Illeum	Bacteria	Firmicutes_A	Clostridia	Lachnospiraceae	Agathobacter	?
MGS.128_11	Illeum	Bacteria	Firmicutes_A	Clostridia	Lachnospiraceae	Agathobacter	?
MGS.128_2	Illeum	Bacteria	Firmicutes_A	Clostridia	Lachnospiraceae	Agathobacter	?
MGS.128_3	Illeum	Bacteria	Firmicutes_A	Clostridia	Lachnospiraceae	Agathobacter	?
MGS.128_4	Illeum	Bacteria	Firmicutes_A	Clostridia	Lachnospiraceae	Agathobacter	?
MGS.128_6	Illeum	Bacteria	Firmicutes_A	Clostridia	Lachnospiraceae	Agathobacter	?
MGS.128_8	Illeum	Bacteria	Firmicutes_A	Clostridia	Lachnospiraceae	Agathobacter	?
MGS.128_9	Illeum	Bacteria	Firmicutes_A	Clostridia	Lachnospiraceae	Agathobacter	?
MGS.130_1	Illeum	Bacteria	Firmicutes	Bacilli	Coprobacillaceae	Erysipelatoclostridium	Erysipelatoclostridium sp000508865
MGS.130_2	Illeum	Bacteria	Firmicutes	Bacilli	Coprobacillaceae	Erysipelatoclostridium	Erysipelatoclostridium sp000508865
MGS.131_1	Illeum	Bacteria	Firmicutes_A	Clostridia	Lachnospiraceae	Agathobacter	Agathobacter sp900543445
MGS.131_2	Illeum	Bacteria	Firmicutes_A	Clostridia	Lachnospiraceae	Agathobacter	Agathobacter sp900543445
MGS.131_4	Illeum	Bacteria	Firmicutes_A	Clostridia	Lachnospiraceae	Agathobacter	Agathobacter sp900543445
MGS.132_14	Illeum	Bacteria	Firmicutes_A	Clostridia	CAG-508	CAG-793	CAG-793 sp013333035
MGS.132_15	Illeum	Bacteria	Firmicutes_A	Clostridia	CAG-508	CAG-793	CAG-793 sp013333035
MGS.132_16	Illeum	Bacteria	Firmicutes_A	Clostridia	CAG-508	CAG-793	CAG-793 sp013333035
MGS.132_17	Illeum	Bacteria	Firmicutes_A	Clostridia	CAG-508	CAG-793	CAG-793 sp013333035
MGS.132_20	Illeum	Bacteria	Firmicutes_A	Clostridia	CAG-508	CAG-793	CAG-793 sp013333035
MGS.132_21	Illeum	Bacteria	Firmicutes_A	Clostridia	CAG-508	CAG-793	CAG-793 sp013333035
MGS.132_22	Illeum	Bacteria	Firmicutes_A	Clostridia	CAG-508	CAG-793	CAG-793 sp013333035
MGS.132_24	Illeum	Bacteria	Firmicutes_A	Clostridia	CAG-508	CAG-793	CAG-793 sp013333035
MGS.132_27	Illeum	Bacteria	Firmicutes_A	Clostridia	CAG-508	CAG-793	CAG-793 sp013333035
MGS.132_28	Illeum	Bacteria	Firmicutes_A	Clostridia	CAG-508	CAG-793	CAG-793 sp013333035
MGS.132_7	Illeum	Bacteria	Firmicutes_A	Clostridia	CAG-508	CAG-793	CAG-793 sp013333035
MGS.132_8	Illeum	Bacteria	Firmicutes_A	Clostridia	CAG-508	CAG-793	CAG-793 sp013333035
MGS.133_1	Illeum	Bacteria	Patescibacteria	Saccharimonadia	Nanogingivalaceae	Nanogingivalis	Nanogingivalis sp900556165
MGS.133_10	Illeum	Bacteria	Patescibacteria	Saccharimonadia	Nanogingivalaceae	Nanogingivalis	Nanogingivalis sp900556165
MGS.133_11	Illeum	Bacteria	Patescibacteria	Saccharimonadia	Nanogingivalaceae	Nanogingivalis	Nanogingivalis sp900556165
MGS.133_12	Illeum	Bacteria	Patescibacteria	Saccharimonadia	Nanogingivalaceae	Nanogingivalis	Nanogingivalis sp900556165
MGS.133_13	Illeum	Bacteria	Patescibacteria	Saccharimonadia	Nanogingivalaceae	Nanogingivalis	Nanogingivalis sp900556165
MGS.133_14	Illeum	Bacteria	Patescibacteria	Saccharimonadia	Nanogingivalaceae	Nanogingivalis	Nanogingivalis sp900556165
MGS.133_15	Illeum	Bacteria	Patescibacteria	Saccharimonadia	Nanogingivalaceae	Nanogingivalis	Nanogingivalis sp900556165
MGS.133_16	Illeum	Bacteria	Patescibacteria	Saccharimonadia	Nanogingivalaceae	Nanogingivalis	Nanogingivalis sp900556165
MGS.133_17	Illeum	Bacteria	Patescibacteria	Saccharimonadia	Nanogingivalaceae	Nanogingivalis	Nanogingivalis sp900556165
MGS.133_18	Illeum	Bacteria	Patescibacteria	Saccharimonadia	Nanogingivalaceae	Nanogingivalis	Nanogingivalis sp900556165
MGS.133_19	Illeum	Bacteria	Patescibacteria	Saccharimonadia	Nanogingivalaceae	Nanogingivalis	Nanogingivalis sp900556165
MGS.133_2	Illeum	Bacteria	Patescibacteria	Saccharimonadia	Nanogingivalaceae	Nanogingivalis	Nanogingivalis sp900556165
MGS.133_20	Illeum	Bacteria	Patescibacteria	Saccharimonadia	Nanogingivalaceae	Nanogingivalis	Nanogingivalis sp900556165
MGS.133_21	Illeum	Bacteria	Patescibacteria	Saccharimonadia	Nanogingivalaceae	Nanogingivalis	Nanogingivalis sp900556165
MGS.133_22	Illeum	Bacteria	Patescibacteria	Saccharimonadia	Nanogingivalaceae	Nanogingivalis	Nanogingivalis sp900556165
MGS.133_23	Illeum	Bacteria	Patescibacteria	Saccharimonadia	Nanogingivalaceae	Nanogingivalis	Nanogingivalis sp900556165
MGS.133_24	Illeum	Bacteria	Patescibacteria	Saccharimonadia	Nanogingivalaceae	Nanogingivalis	Nanogingivalis sp900556165
MGS.133_25	Illeum	Bacteria	Patescibacteria	Saccharimonadia	Nanogingivalaceae	Nanogingivalis	Nanogingivalis sp900556165
MGS.133_3	Illeum	Bacteria	Patescibacteria	Saccharimonadia	Nanogingivalaceae	Nanogingivalis	Nanogingivalis sp900556165
MGS.133_4	Illeum	Bacteria	Patescibacteria	Saccharimonadia	Nanogingivalaceae	Nanogingivalis	Nanogingivalis sp900556165
MGS.133_5	Illeum	Bacteria	Patescibacteria	Saccharimonadia	Nanogingivalaceae	Nanogingivalis	Nanogingivalis sp900556165
MGS.133_6	Illeum	Bacteria	Patescibacteria	Saccharimonadia	Nanogingivalaceae	Nanogingivalis	Nanogingivalis sp900556165
MGS.133_7	Illeum	Bacteria	Patescibacteria	Saccharimonadia	Nanogingivalaceae	Nanogingivalis	Nanogingivalis sp900556165
MGS.133_8	Illeum	Bacteria	Patescibacteria	Saccharimonadia	Nanogingivalaceae	Nanogingivalis	Nanogingivalis sp900556165
MGS.133_9	Illeum	Bacteria	Patescibacteria	Saccharimonadia	Nanogingivalaceae	Nanogingivalis	Nanogingivalis sp900556165
MGS.134_1	Illeum	Bacteria	Proteobacteria	Gammaproteobacteria	Burkholderiaceae	Parasutterella	Parasutterella excrementihominis
MGS.134_3	Illeum	Bacteria	Proteobacteria	Gammaproteobacteria	Burkholderiaceae	Parasutterella	Parasutterella excrementihominis
MGS.135_10	Illeum	Bacteria	Patescibacteria	Saccharimonadia	Nanosyncoccaceae	Nanosyncoccus	?
MGS.135_2	Illeum	Bacteria	Patescibacteria	Saccharimonadia	Nanosyncoccaceae	Nanosyncoccus	?
MGS.135_3	Illeum	Bacteria	Patescibacteria	Saccharimonadia	Nanosyncoccaceae	Nanosyncoccus	?
MGS.136_1	Illeum	Bacteria	Firmicutes_A	Clostridia	Clostridiaceae	Clostridium	Clostridium saudiense
MGS.136_2	Illeum	Bacteria	Firmicutes_A	Clostridia	Clostridiaceae	Clostridium	Clostridium saudiense
MGS.136_3	Illeum	Bacteria	Firmicutes_A	Clostridia	Clostridiaceae	Clostridium	Clostridium saudiense
MGS.137_10	Illeum	Bacteria	Proteobacteria	Gammaproteobacteria	Pasteurellaceae	Haemophilus_A	Haemophilus_A parahaemolyticus
MGS.137_11	Illeum	Bacteria	Proteobacteria	Gammaproteobacteria	Pasteurellaceae	Haemophilus_A	Haemophilus_A parahaemolyticus
MGS.137_12	Illeum	Bacteria	Proteobacteria	Gammaproteobacteria	Pasteurellaceae	Haemophilus_A	Haemophilus_A parahaemolyticus
MGS.137_13	Illeum	Bacteria	Proteobacteria	Gammaproteobacteria	Pasteurellaceae	Haemophilus_A	Haemophilus_A parahaemolyticus
MGS.137_14	Illeum	Bacteria	Proteobacteria	Gammaproteobacteria	Pasteurellaceae	Haemophilus_A	Haemophilus_A parahaemolyticus
MGS.137_16	Illeum	Bacteria	Proteobacteria	Gammaproteobacteria	Pasteurellaceae	Haemophilus_A	Haemophilus_A parahaemolyticus
MGS.137_17	Illeum	Bacteria	Proteobacteria	Gammaproteobacteria	Pasteurellaceae	Haemophilus_A	Haemophilus_A parahaemolyticus
MGS.137_18	Illeum	Bacteria	Proteobacteria	Gammaproteobacteria	Pasteurellaceae	Haemophilus_A	Haemophilus_A parahaemolyticus
MGS.137_19	Illeum	Bacteria	Proteobacteria	Gammaproteobacteria	Pasteurellaceae	Haemophilus_A	Haemophilus_A parahaemolyticus
MGS.137_20	Illeum	Bacteria	Proteobacteria	Gammaproteobacteria	Pasteurellaceae	Haemophilus_A	Haemophilus_A parahaemolyticus
MGS.137_21	Illeum	Bacteria	Proteobacteria	Gammaproteobacteria	Pasteurellaceae	Haemophilus_A	Haemophilus_A parahaemolyticus
MGS.137_22	Illeum	Bacteria	Proteobacteria	Gammaproteobacteria	Pasteurellaceae	Haemophilus_A	Haemophilus_A parahaemolyticus
MGS.137_23	Illeum	Bacteria	Proteobacteria	Gammaproteobacteria	Pasteurellaceae	Haemophilus_A	Haemophilus_A parahaemolyticus
MGS.137_24	Illeum	Bacteria	Proteobacteria	Gammaproteobacteria	Pasteurellaceae	Haemophilus_A	Haemophilus_A parahaemolyticus
MGS.137_25	Illeum	Bacteria	Proteobacteria	Gammaproteobacteria	Pasteurellaceae	Haemophilus_A	Haemophilus_A parahaemolyticus
MGS.137_26	Illeum	Bacteria	Proteobacteria	Gammaproteobacteria	Pasteurellaceae	Haemophilus_A	Haemophilus_A parahaemolyticus
MGS.137_27	Illeum	Bacteria	Proteobacteria	Gammaproteobacteria	Pasteurellaceae	Haemophilus_A	Haemophilus_A parahaemolyticus
MGS.137_28	Illeum	Bacteria	Proteobacteria	Gammaproteobacteria	Pasteurellaceae	Haemophilus_A	Haemophilus_A parahaemolyticus
MGS.137_29	Illeum	Bacteria	Proteobacteria	Gammaproteobacteria	Pasteurellaceae	Haemophilus_A	Haemophilus_A parahaemolyticus
MGS.137_30	Illeum	Bacteria	Proteobacteria	Gammaproteobacteria	Pasteurellaceae	Haemophilus_A	Haemophilus_A parahaemolyticus
MGS.137_31	Illeum	Bacteria	Proteobacteria	Gammaproteobacteria	Pasteurellaceae	Haemophilus_A	Haemophilus_A parahaemolyticus
MGS.137_32	Illeum	Bacteria	Proteobacteria	Gammaproteobacteria	Pasteurellaceae	Haemophilus_A	Haemophilus_A parahaemolyticus
MGS.137_33	Illeum	Bacteria	Proteobacteria	Gammaproteobacteria	Pasteurellaceae	Haemophilus_A	Haemophilus_A parahaemolyticus
MGS.137_34	Illeum	Bacteria	Proteobacteria	Gammaproteobacteria	Pasteurellaceae	Haemophilus_A	Haemophilus_A parahaemolyticus
MGS.137_35	Illeum	Bacteria	Proteobacteria	Gammaproteobacteria	Pasteurellaceae	Haemophilus_A	Haemophilus_A parahaemolyticus
MGS.137_36	Illeum	Bacteria	Proteobacteria	Gammaproteobacteria	Pasteurellaceae	Haemophilus_A	Haemophilus_A parahaemolyticus
MGS.137_37	Illeum	Bacteria	Proteobacteria	Gammaproteobacteria	Pasteurellaceae	Haemophilus_A	Haemophilus_A parahaemolyticus
MGS.137_38	Illeum	Bacteria	Proteobacteria	Gammaproteobacteria	Pasteurellaceae	Haemophilus_A	Haemophilus_A parahaemolyticus
MGS.137_39	Illeum	Bacteria	Proteobacteria	Gammaproteobacteria	Pasteurellaceae	Haemophilus_A	Haemophilus_A parahaemolyticus
MGS.137_4	Illeum	Bacteria	Proteobacteria	Gammaproteobacteria	Pasteurellaceae	Haemophilus_A	Haemophilus_A parahaemolyticus
MGS.137_5	Illeum	Bacteria	Proteobacteria	Gammaproteobacteria	Pasteurellaceae	Haemophilus_A	Haemophilus_A parahaemolyticus
MGS.137_6	Illeum	Bacteria	Proteobacteria	Gammaproteobacteria	Pasteurellaceae	Haemophilus_A	Haemophilus_A parahaemolyticus
MGS.137_7	Illeum	Bacteria	Proteobacteria	Gammaproteobacteria	Pasteurellaceae	Haemophilus_A	Haemophilus_A parahaemolyticus
MGS.137_8	Illeum	Bacteria	Proteobacteria	Gammaproteobacteria	Pasteurellaceae	Haemophilus_A	Haemophilus_A parahaemolyticus
MGS.137_9	Illeum	Bacteria	Proteobacteria	Gammaproteobacteria	Pasteurellaceae	Haemophilus_A	Haemophilus_A parahaemolyticus
MGS.138_1	Illeum	Bacteria	Proteobacteria	Gammaproteobacteria	Enterobacteriaceae	Citrobacter	Citrobacter freundii
MGS.138_10	Illeum	Bacteria	Proteobacteria	Gammaproteobacteria	Enterobacteriaceae	Citrobacter	Citrobacter freundii
MGS.138_11	Illeum	Bacteria	Proteobacteria	Gammaproteobacteria	Enterobacteriaceae	Citrobacter	Citrobacter freundii
MGS.138_12	Illeum	Bacteria	Proteobacteria	Gammaproteobacteria	Enterobacteriaceae	Citrobacter	Citrobacter freundii
MGS.138_13	Illeum	Bacteria	Proteobacteria	Gammaproteobacteria	Enterobacteriaceae	Citrobacter	Citrobacter freundii
MGS.138_2	Illeum	Bacteria	Proteobacteria	Gammaproteobacteria	Enterobacteriaceae	Citrobacter	Citrobacter freundii
MGS.138_3	Illeum	Bacteria	Proteobacteria	Gammaproteobacteria	Enterobacteriaceae	Citrobacter	Citrobacter freundii
MGS.138_4	Illeum	Bacteria	Proteobacteria	Gammaproteobacteria	Enterobacteriaceae	Citrobacter	Citrobacter freundii
MGS.138_5	Illeum	Bacteria	Proteobacteria	Gammaproteobacteria	Enterobacteriaceae	Citrobacter	Citrobacter freundii
MGS.138_6	Illeum	Bacteria	Proteobacteria	Gammaproteobacteria	Enterobacteriaceae	Citrobacter	Citrobacter freundii
MGS.138_7	Illeum	Bacteria	Proteobacteria	Gammaproteobacteria	Enterobacteriaceae	Citrobacter	Citrobacter freundii
MGS.138_8	Illeum	Bacteria	Proteobacteria	Gammaproteobacteria	Enterobacteriaceae	Citrobacter	Citrobacter freundii
MGS.138_9	Illeum	Bacteria	Proteobacteria	Gammaproteobacteria	Enterobacteriaceae	Citrobacter	Citrobacter freundii
MGS.139_1	Illeum	Bacteria	Firmicutes_A	Clostridia	Ruminococcaceae	Ruminococcus_C	Ruminococcus_C sp000433635
MGS.14_1	Illeum	Bacteria	Actinobacteriota	Actinomycetia	Mycobacteriaceae	Corynebacterium	Corynebacterium durum
MGS.14_13	Illeum	Bacteria	Actinobacteriota	Actinomycetia	Mycobacteriaceae	Corynebacterium	Corynebacterium durum
MGS.14_2	Illeum	Bacteria	Actinobacteriota	Actinomycetia	Mycobacteriaceae	Corynebacterium	Corynebacterium durum
MGS.14_6	Illeum	Bacteria	Actinobacteriota	Actinomycetia	Mycobacteriaceae	Corynebacterium	Corynebacterium durum
MGS.14_8	Illeum	Bacteria	Actinobacteriota	Actinomycetia	Mycobacteriaceae	Corynebacterium	Corynebacterium durum
MGS.142_1	Illeum	Bacteria	Firmicutes	Bacilli	Erysipelotrichaceae	Clostridium_AQ	Clostridium_AQ innocuum
MGS.143_1	Illeum	Bacteria	Firmicutes_A	Clostridia	Ruminococcaceae	Ruminococcus_D	Ruminococcus_D bicirculans
MGS.143_2	Illeum	Bacteria	Firmicutes_A	Clostridia	Ruminococcaceae	Ruminococcus_D	Ruminococcus_D bicirculans
MGS.144_1	Illeum	Bacteria	Firmicutes_C	Negativicutes	Megasphaeraceae	Megasphaera	Megasphaera elsdenii
MGS.149_1	Illeum	Bacteria	Firmicutes_A	Clostridia	Butyricicoccaceae	Agathobaculum	Agathobaculum butyriciproducens
MGS.149_2	Illeum	Bacteria	Firmicutes_A	Clostridia	Butyricicoccaceae	Agathobaculum	Agathobaculum butyriciproducens
MGS.149_3	Illeum	Bacteria	Firmicutes_A	Clostridia	Butyricicoccaceae	Agathobaculum	Agathobaculum butyriciproducens
MGS.149_5	Illeum	Bacteria	Firmicutes_A	Clostridia	Butyricicoccaceae	Agathobaculum	Agathobaculum butyriciproducens
MGS.149_7	Illeum	Bacteria	Firmicutes_A	Clostridia	Butyricicoccaceae	Agathobaculum	Agathobaculum butyriciproducens
MGS.15_1	Illeum	Bacteria	Firmicutes_A	Clostridia	Lachnospiraceae	F0428	F0428 sp003043955
MGS.15_10	Illeum	Bacteria	Firmicutes_A	Clostridia	Lachnospiraceae	F0428	F0428 sp003043955
MGS.15_11	Illeum	Bacteria	Firmicutes_A	Clostridia	Lachnospiraceae	F0428	F0428 sp003043955
MGS.15_12	Illeum	Bacteria	Firmicutes_A	Clostridia	Lachnospiraceae	F0428	F0428 sp003043955
MGS.15_13	Illeum	Bacteria	Firmicutes_A	Clostridia	Lachnospiraceae	F0428	F0428 sp003043955
MGS.15_14	Illeum	Bacteria	Firmicutes_A	Clostridia	Lachnospiraceae	F0428	F0428 sp003043955
MGS.15_15	Illeum	Bacteria	Firmicutes_A	Clostridia	Lachnospiraceae	F0428	F0428 sp003043955
MGS.15_17	Illeum	Bacteria	Firmicutes_A	Clostridia	Lachnospiraceae	F0428	F0428 sp003043955
MGS.15_18	Illeum	Bacteria	Firmicutes_A	Clostridia	Lachnospiraceae	F0428	F0428 sp003043955
MGS.15_2	Illeum	Bacteria	Firmicutes_A	Clostridia	Lachnospiraceae	F0428	F0428 sp003043955
MGS.15_22	Illeum	Bacteria	Firmicutes_A	Clostridia	Lachnospiraceae	F0428	F0428 sp003043955
MGS.15_23	Illeum	Bacteria	Firmicutes_A	Clostridia	Lachnospiraceae	F0428	F0428 sp003043955
MGS.15_27	Illeum	Bacteria	Firmicutes_A	Clostridia	Lachnospiraceae	F0428	F0428 sp003043955
MGS.15_29	Illeum	Bacteria	Firmicutes_A	Clostridia	Lachnospiraceae	F0428	F0428 sp003043955
MGS.15_3	Illeum	Bacteria	Firmicutes_A	Clostridia	Lachnospiraceae	F0428	F0428 sp003043955
MGS.15_4	Illeum	Bacteria	Firmicutes_A	Clostridia	Lachnospiraceae	F0428	F0428 sp003043955
MGS.15_5	Illeum	Bacteria	Firmicutes_A	Clostridia	Lachnospiraceae	F0428	F0428 sp003043955
MGS.15_6	Illeum	Bacteria	Firmicutes_A	Clostridia	Lachnospiraceae	F0428	F0428 sp003043955
MGS.15_7	Illeum	Bacteria	Firmicutes_A	Clostridia	Lachnospiraceae	F0428	F0428 sp003043955
MGS.15_8	Illeum	Bacteria	Firmicutes_A	Clostridia	Lachnospiraceae	F0428	F0428 sp003043955
MGS.15_9	Illeum	Bacteria	Firmicutes_A	Clostridia	Lachnospiraceae	F0428	F0428 sp003043955
MGS.151_12	Illeum	Bacteria	Proteobacteria	Gammaproteobacteria	Pasteurellaceae	Haemophilus_A	Haemophilus_A sputorum
MGS.151_14	Illeum	Bacteria	Proteobacteria	Gammaproteobacteria	Pasteurellaceae	Haemophilus_A	Haemophilus_A sputorum
MGS.151_15	Illeum	Bacteria	Proteobacteria	Gammaproteobacteria	Pasteurellaceae	Haemophilus_A	Haemophilus_A sputorum
MGS.151_16	Illeum	Bacteria	Proteobacteria	Gammaproteobacteria	Pasteurellaceae	Haemophilus_A	Haemophilus_A sputorum
MGS.151_18	Illeum	Bacteria	Proteobacteria	Gammaproteobacteria	Pasteurellaceae	Haemophilus_A	Haemophilus_A sputorum
MGS.151_19	Illeum	Bacteria	Proteobacteria	Gammaproteobacteria	Pasteurellaceae	Haemophilus_A	Haemophilus_A sputorum
MGS.152_1	Illeum	Bacteria	Firmicutes_A	Clostridia	Lachnospiraceae	Anaerobutyricum	Anaerobutyricum hallii
MGS.152_2	Illeum	Bacteria	Firmicutes_A	Clostridia	Lachnospiraceae	Anaerobutyricum	Anaerobutyricum hallii
MGS.152_3	Illeum	Bacteria	Firmicutes_A	Clostridia	Lachnospiraceae	Anaerobutyricum	Anaerobutyricum hallii
MGS.152_6	Illeum	Bacteria	Firmicutes_A	Clostridia	Lachnospiraceae	Anaerobutyricum	Anaerobutyricum hallii
MGS.152_7	Illeum	Bacteria	Firmicutes_A	Clostridia	Lachnospiraceae	Anaerobutyricum	Anaerobutyricum hallii
MGS.152_8	Illeum	Bacteria	Firmicutes_A	Clostridia	Lachnospiraceae	Anaerobutyricum	Anaerobutyricum hallii
MGS.153_2	Illeum	Bacteria	Firmicutes_A	Clostridia	Lachnospiraceae	Catonella	Catonella morbi
MGS.153_3	Illeum	Bacteria	Firmicutes_A	Clostridia	Lachnospiraceae	Catonella	Catonella morbi
MGS.154_1	Illeum	Bacteria	Firmicutes_A	Clostridia	Ruminococcaceae	Ruminococcus_C	Ruminococcus_C sp000980705
MGS.154_2	Illeum	Bacteria	Firmicutes_A	Clostridia	Ruminococcaceae	Ruminococcus_C	Ruminococcus_C sp000980705
MGS.154_4	Illeum	Bacteria	Firmicutes_A	Clostridia	Ruminococcaceae	Ruminococcus_C	Ruminococcus_C sp000980705
MGS.154_5	Illeum	Bacteria	Firmicutes_A	Clostridia	Ruminococcaceae	Ruminococcus_C	Ruminococcus_C sp000980705
MGS.154_6	Illeum	Bacteria	Firmicutes_A	Clostridia	Ruminococcaceae	Ruminococcus_C	Ruminococcus_C sp000980705
MGS.154_7	Illeum	Bacteria	Firmicutes_A	Clostridia	Ruminococcaceae	Ruminococcus_C	Ruminococcus_C sp000980705
MGS.154_8	Illeum	Bacteria	Firmicutes_A	Clostridia	Ruminococcaceae	Ruminococcus_C	Ruminococcus_C sp000980705
MGS.155_1	Illeum	Bacteria	Firmicutes_A	Clostridia	Ruminococcaceae	Gemmiger	Gemmiger formicilis
MGS.155_2	Illeum	Bacteria	Firmicutes_A	Clostridia	Ruminococcaceae	Gemmiger	Gemmiger formicilis
MGS.155_3	Illeum	Bacteria	Firmicutes_A	Clostridia	Ruminococcaceae	Gemmiger	Gemmiger formicilis
MGS.156_1	Illeum	Bacteria	Firmicutes_A	Clostridia	Lachnospiraceae	CAG-194	CAG-194 sp000432915
MGS.156_3	Illeum	Bacteria	Firmicutes_A	Clostridia	Lachnospiraceae	CAG-194	CAG-194 sp000432915
MGS.156_4	Illeum	Bacteria	Firmicutes_A	Clostridia	Lachnospiraceae	CAG-194	CAG-194 sp000432915
MGS.156_5	Illeum	Bacteria	Firmicutes_A	Clostridia	Lachnospiraceae	CAG-194	CAG-194 sp000432915
MGS.158_1	Illeum	Bacteria	Firmicutes	Bacilli	Lactobacillaceae	Lactobacillus	Lactobacillus acidophilus
MGS.16_1	Illeum	Bacteria	Firmicutes_A	Clostridia	Lachnospiraceae	Bacteroides_F	Bacteroides_F pectinophilus
MGS.16_4	Illeum	Bacteria	Firmicutes_A	Clostridia	Lachnospiraceae	Bacteroides_F	Bacteroides_F pectinophilus
MGS.16_5	Illeum	Bacteria	Firmicutes_A	Clostridia	Lachnospiraceae	Bacteroides_F	Bacteroides_F pectinophilus
MGS.160_1	Illeum	Bacteria	Firmicutes_A	Clostridia	Lachnospiraceae	Blautia_A	Blautia_A sp900066145
MGS.160_2	Illeum	Bacteria	Firmicutes_A	Clostridia	Lachnospiraceae	Blautia_A	Blautia_A sp900066145
MGS.160_3	Illeum	Bacteria	Firmicutes_A	Clostridia	Lachnospiraceae	Blautia_A	Blautia_A sp900066145
MGS.160_4	Illeum	Bacteria	Firmicutes_A	Clostridia	Lachnospiraceae	Blautia_A	Blautia_A sp900066145
MGS.160_6	Illeum	Bacteria	Firmicutes_A	Clostridia	Lachnospiraceae	Blautia_A	Blautia_A sp900066145
MGS.160_7	Illeum	Bacteria	Firmicutes_A	Clostridia	Lachnospiraceae	Blautia_A	Blautia_A sp900066145
MGS.162_1	Illeum	Bacteria	Actinobacteriota	Actinomycetia	Actinomycetaceae	Actinomyces	Actinomyces sp000220835
MGS.162_10	Illeum	Bacteria	Actinobacteriota	Actinomycetia	Actinomycetaceae	Actinomyces	Actinomyces sp000220835
MGS.162_11	Illeum	Bacteria	Actinobacteriota	Actinomycetia	Actinomycetaceae	Actinomyces	Actinomyces sp000220835
MGS.162_2	Illeum	Bacteria	Actinobacteriota	Actinomycetia	Actinomycetaceae	Actinomyces	Actinomyces sp000220835
MGS.162_4	Illeum	Bacteria	Actinobacteriota	Actinomycetia	Actinomycetaceae	Actinomyces	Actinomyces sp000220835
MGS.162_7	Illeum	Bacteria	Actinobacteriota	Actinomycetia	Actinomycetaceae	Actinomyces	Actinomyces sp000220835
MGS.162_8	Illeum	Bacteria	Actinobacteriota	Actinomycetia	Actinomycetaceae	Actinomyces	Actinomyces sp000220835
MGS.162_9	Illeum	Bacteria	Actinobacteriota	Actinomycetia	Actinomycetaceae	Actinomyces	Actinomyces sp000220835
MGS.163_10	Illeum	Bacteria	Firmicutes_A	Clostridia	Lachnospiraceae	Oribacterium	?
MGS.163_2	Illeum	Bacteria	Firmicutes_A	Clostridia	Lachnospiraceae	Oribacterium	?
MGS.163_3	Illeum	Bacteria	Firmicutes_A	Clostridia	Lachnospiraceae	Oribacterium	?
MGS.163_6	Illeum	Bacteria	Firmicutes_A	Clostridia	Lachnospiraceae	Oribacterium	?
MGS.164_1	Illeum	Bacteria	Firmicutes_A	Clostridia	Lachnospiraceae	UBA3402	UBA3402 sp003478355
MGS.167_1	Illeum	Bacteria	Firmicutes_A	Clostridia	Lachnospiraceae	Clostridium_Q	Clostridium_Q fessum
MGS.167_2	Illeum	Bacteria	Firmicutes_A	Clostridia	Lachnospiraceae	Clostridium_Q	Clostridium_Q fessum
MGS.167_3	Illeum	Bacteria	Firmicutes_A	Clostridia	Lachnospiraceae	Clostridium_Q	Clostridium_Q fessum
MGS.167_5	Illeum	Bacteria	Firmicutes_A	Clostridia	Lachnospiraceae	Clostridium_Q	Clostridium_Q fessum
MGS.168_1	Illeum	Bacteria	Firmicutes_A	Clostridia	Lachnospiraceae	Anaerostipes	Anaerostipes hadrus
MGS.168_10	Illeum	Bacteria	Firmicutes_A	Clostridia	Lachnospiraceae	Anaerostipes	Anaerostipes hadrus
MGS.168_12	Illeum	Bacteria	Firmicutes_A	Clostridia	Lachnospiraceae	Anaerostipes	Anaerostipes hadrus
MGS.168_13	Illeum	Bacteria	Firmicutes_A	Clostridia	Lachnospiraceae	Anaerostipes	Anaerostipes hadrus
MGS.168_3	Illeum	Bacteria	Firmicutes_A	Clostridia	Lachnospiraceae	Anaerostipes	Anaerostipes hadrus
MGS.168_4	Illeum	Bacteria	Firmicutes_A	Clostridia	Lachnospiraceae	Anaerostipes	Anaerostipes hadrus
MGS.168_5	Illeum	Bacteria	Firmicutes_A	Clostridia	Lachnospiraceae	Anaerostipes	Anaerostipes hadrus
MGS.168_6	Illeum	Bacteria	Firmicutes_A	Clostridia	Lachnospiraceae	Anaerostipes	Anaerostipes hadrus
MGS.168_7	Illeum	Bacteria	Firmicutes_A	Clostridia	Lachnospiraceae	Anaerostipes	Anaerostipes hadrus
MGS.168_9	Illeum	Bacteria	Firmicutes_A	Clostridia	Lachnospiraceae	Anaerostipes	Anaerostipes hadrus
MGS.169_1	Illeum	Bacteria	Actinobacteriota	Actinomycetia	Bifidobacteriaceae	Bifidobacterium	Bifidobacterium adolescentis
MGS.17_1	Illeum	Bacteria	Bacteroidota	Bacteroidia	Muribaculaceae	Limisoma	Limisoma sp000437795
MGS.17_2	Illeum	Bacteria	Bacteroidota	Bacteroidia	Muribaculaceae	Limisoma	Limisoma sp000437795
MGS.170_13	Illeum	Bacteria	Firmicutes	Bacilli	Gemellaceae	Gemella	Gemella sanguinis
MGS.170_14	Illeum	Bacteria	Firmicutes	Bacilli	Gemellaceae	Gemella	Gemella sanguinis
MGS.170_30	Illeum	Bacteria	Firmicutes	Bacilli	Gemellaceae	Gemella	Gemella sanguinis
MGS.171_1	Illeum	Bacteria	Actinobacteriota	Actinomycetia	Actinomycetaceae	Pauljensenia	Pauljensenia cardiffensis
MGS.171_2	Illeum	Bacteria	Actinobacteriota	Actinomycetia	Actinomycetaceae	Pauljensenia	Pauljensenia cardiffensis
MGS.171_3	Illeum	Bacteria	Actinobacteriota	Actinomycetia	Actinomycetaceae	Pauljensenia	Pauljensenia cardiffensis
MGS.172_1	Illeum	Bacteria	Firmicutes_A	Clostridia	Lachnospiraceae	Enterocloster	Enterocloster sp000431375
MGS.172_3	Illeum	Bacteria	Firmicutes_A	Clostridia	Lachnospiraceae	Enterocloster	Enterocloster sp000431375
MGS.172_4	Illeum	Bacteria	Firmicutes_A	Clostridia	Lachnospiraceae	Enterocloster	Enterocloster sp000431375
MGS.172_5	Illeum	Bacteria	Firmicutes_A	Clostridia	Lachnospiraceae	Enterocloster	Enterocloster sp000431375
MGS.173_22	Illeum	Bacteria	Fusobacteriota	Fusobacteriia	Leptotrichiaceae	JABCPH02	JABCPH02 sp013333235
MGS.173_23	Illeum	Bacteria	Fusobacteriota	Fusobacteriia	Leptotrichiaceae	JABCPH02	JABCPH02 sp013333235
MGS.173_3	Illeum	Bacteria	Fusobacteriota	Fusobacteriia	Leptotrichiaceae	JABCPH02	JABCPH02 sp013333235
MGS.173_4	Illeum	Bacteria	Fusobacteriota	Fusobacteriia	Leptotrichiaceae	JABCPH02	JABCPH02 sp013333235
MGS.173_5	Illeum	Bacteria	Fusobacteriota	Fusobacteriia	Leptotrichiaceae	JABCPH02	JABCPH02 sp013333235
MGS.173_6	Illeum	Bacteria	Fusobacteriota	Fusobacteriia	Leptotrichiaceae	JABCPH02	JABCPH02 sp013333235
MGS.173_9	Illeum	Bacteria	Fusobacteriota	Fusobacteriia	Leptotrichiaceae	JABCPH02	JABCPH02 sp013333235
MGS.174_1	Illeum	Bacteria	Firmicutes_A	Clostridia	Clostridiaceae	Clostridium	Clostridium sp001916075
MGS.174_10	Illeum	Bacteria	Firmicutes_A	Clostridia	Clostridiaceae	Clostridium	Clostridium sp001916075
MGS.174_11	Illeum	Bacteria	Firmicutes_A	Clostridia	Clostridiaceae	Clostridium	Clostridium sp001916075
MGS.174_12	Illeum	Bacteria	Firmicutes_A	Clostridia	Clostridiaceae	Clostridium	Clostridium sp001916075
MGS.174_2	Illeum	Bacteria	Firmicutes_A	Clostridia	Clostridiaceae	Clostridium	Clostridium sp001916075
MGS.174_3	Illeum	Bacteria	Firmicutes_A	Clostridia	Clostridiaceae	Clostridium	Clostridium sp001916075
MGS.174_4	Illeum	Bacteria	Firmicutes_A	Clostridia	Clostridiaceae	Clostridium	Clostridium sp001916075
MGS.174_6	Illeum	Bacteria	Firmicutes_A	Clostridia	Clostridiaceae	Clostridium	Clostridium sp001916075
MGS.174_7	Illeum	Bacteria	Firmicutes_A	Clostridia	Clostridiaceae	Clostridium	Clostridium sp001916075
MGS.174_8	Illeum	Bacteria	Firmicutes_A	Clostridia	Clostridiaceae	Clostridium	Clostridium sp001916075
MGS.174_9	Illeum	Bacteria	Firmicutes_A	Clostridia	Clostridiaceae	Clostridium	Clostridium sp001916075
MGS.175_2	Illeum	Bacteria	Fusobacteriota	Fusobacteriia	Leptotrichiaceae	Leptotrichia	Leptotrichia wadei_A
MGS.175_21	Illeum	Bacteria	Fusobacteriota	Fusobacteriia	Leptotrichiaceae	Leptotrichia	Leptotrichia wadei_A
MGS.175_33	Illeum	Bacteria	Fusobacteriota	Fusobacteriia	Leptotrichiaceae	Leptotrichia	Leptotrichia wadei_A
MGS.175_35	Illeum	Bacteria	Fusobacteriota	Fusobacteriia	Leptotrichiaceae	Leptotrichia	Leptotrichia wadei_A
MGS.175_40	Illeum	Bacteria	Fusobacteriota	Fusobacteriia	Leptotrichiaceae	Leptotrichia	Leptotrichia wadei_A
MGS.175_41	Illeum	Bacteria	Fusobacteriota	Fusobacteriia	Leptotrichiaceae	Leptotrichia	Leptotrichia wadei_A
MGS.175_42	Illeum	Bacteria	Fusobacteriota	Fusobacteriia	Leptotrichiaceae	Leptotrichia	Leptotrichia wadei_A
MGS.176_1	Illeum	Bacteria	Firmicutes_A	Clostridia	Lachnospiraceae	Butyribacter	?
MGS.176_2	Illeum	Bacteria	Firmicutes_A	Clostridia	Lachnospiraceae	Butyribacter	?
MGS.176_4	Illeum	Bacteria	Firmicutes_A	Clostridia	Lachnospiraceae	Butyribacter	?
MGS.177_1	Illeum	Bacteria	Proteobacteria	Gammaproteobacteria	Burkholderiaceae	Lautropia	Lautropia mirabilis
MGS.178_10	Illeum	Bacteria	Firmicutes_A	Clostridia	Borkfalkiaceae	UBA7597	UBA7597 sp003448195
MGS.178_2	Illeum	Bacteria	Firmicutes_A	Clostridia	Borkfalkiaceae	UBA7597	UBA7597 sp003448195
MGS.178_3	Illeum	Bacteria	Firmicutes_A	Clostridia	Borkfalkiaceae	UBA7597	UBA7597 sp003448195
MGS.178_4	Illeum	Bacteria	Firmicutes_A	Clostridia	Borkfalkiaceae	UBA7597	UBA7597 sp003448195
MGS.178_5	Illeum	Bacteria	Firmicutes_A	Clostridia	Borkfalkiaceae	UBA7597	UBA7597 sp003448195
MGS.178_6	Illeum	Bacteria	Firmicutes_A	Clostridia	Borkfalkiaceae	UBA7597	UBA7597 sp003448195
MGS.178_8	Illeum	Bacteria	Firmicutes_A	Clostridia	Borkfalkiaceae	UBA7597	UBA7597 sp003448195
MGS.178_9	Illeum	Bacteria	Firmicutes_A	Clostridia	Borkfalkiaceae	UBA7597	UBA7597 sp003448195
MGS.179_1	Illeum	Bacteria	Firmicutes_A	Clostridia	Oscillospiraceae	Faecousia	Faecousia sp900549705
MGS.18_13	Illeum	Bacteria	Firmicutes_A	Clostridia	Lachnospiraceae	Catonella	Catonella massiliensis
MGS.18_5	Illeum	Bacteria	Firmicutes_A	Clostridia	Lachnospiraceae	Catonella	Catonella massiliensis
MGS.18_6	Illeum	Bacteria	Firmicutes_A	Clostridia	Lachnospiraceae	Catonella	Catonella massiliensis
MGS.18_7	Illeum	Bacteria	Firmicutes_A	Clostridia	Lachnospiraceae	Catonella	Catonella massiliensis
MGS.18_8	Illeum	Bacteria	Firmicutes_A	Clostridia	Lachnospiraceae	Catonella	Catonella massiliensis
MGS.18_9	Illeum	Bacteria	Firmicutes_A	Clostridia	Lachnospiraceae	Catonella	Catonella massiliensis
MGS.180_1	Illeum	Bacteria	Firmicutes	Bacilli	Lactobacillaceae	Lacticaseibacillus	Lacticaseibacillus paracasei
MGS.180_2	Illeum	Bacteria	Firmicutes	Bacilli	Lactobacillaceae	Lacticaseibacillus	Lacticaseibacillus paracasei
MGS.180_3	Illeum	Bacteria	Firmicutes	Bacilli	Lactobacillaceae	Lacticaseibacillus	Lacticaseibacillus paracasei
MGS.180_4	Illeum	Bacteria	Firmicutes	Bacilli	Lactobacillaceae	Lacticaseibacillus	Lacticaseibacillus paracasei
MGS.181_1	Illeum	Bacteria	Firmicutes_A	Clostridia	Ruminococcaceae	Angelakisella	Angelakisella sp900547385
MGS.181_3	Illeum	Bacteria	Firmicutes_A	Clostridia	Ruminococcaceae	Angelakisella	Angelakisella sp900547385
MGS.182_1	Illeum	Bacteria	Proteobacteria	Gammaproteobacteria	Enterobacteriaceae	Escherichia	Escherichia coli
MGS.182_2	Illeum	Bacteria	Proteobacteria	Gammaproteobacteria	Enterobacteriaceae	Escherichia	Escherichia coli
MGS.182_3	Illeum	Bacteria	Proteobacteria	Gammaproteobacteria	Enterobacteriaceae	Escherichia	Escherichia coli
MGS.182_4	Illeum	Bacteria	Proteobacteria	Gammaproteobacteria	Enterobacteriaceae	Escherichia	Escherichia coli
MGS.182_5	Illeum	Bacteria	Proteobacteria	Gammaproteobacteria	Enterobacteriaceae	Escherichia	Escherichia coli
MGS.182_6	Illeum	Bacteria	Proteobacteria	Gammaproteobacteria	Enterobacteriaceae	Escherichia	Escherichia coli
MGS.182_7	Illeum	Bacteria	Proteobacteria	Gammaproteobacteria	Enterobacteriaceae	Escherichia	Escherichia coli
MGS.182_8	Illeum	Bacteria	Proteobacteria	Gammaproteobacteria	Enterobacteriaceae	Escherichia	Escherichia coli
MGS.182_9	Illeum	Bacteria	Proteobacteria	Gammaproteobacteria	Enterobacteriaceae	Escherichia	Escherichia coli
MGS.184_1	Illeum	Bacteria	Firmicutes_A	Clostridia	Lachnospiraceae	Blautia_A	Blautia_A sp000436615
MGS.184_10	Illeum	Bacteria	Firmicutes_A	Clostridia	Lachnospiraceae	Blautia_A	Blautia_A sp000436615
MGS.184_2	Illeum	Bacteria	Firmicutes_A	Clostridia	Lachnospiraceae	Blautia_A	Blautia_A sp000436615
MGS.184_3	Illeum	Bacteria	Firmicutes_A	Clostridia	Lachnospiraceae	Blautia_A	Blautia_A sp000436615
MGS.184_4	Illeum	Bacteria	Firmicutes_A	Clostridia	Lachnospiraceae	Blautia_A	Blautia_A sp000436615
MGS.184_5	Illeum	Bacteria	Firmicutes_A	Clostridia	Lachnospiraceae	Blautia_A	Blautia_A sp000436615
MGS.184_7	Illeum	Bacteria	Firmicutes_A	Clostridia	Lachnospiraceae	Blautia_A	Blautia_A sp000436615
MGS.185_1	Illeum	Bacteria	Firmicutes_A	Clostridia	Lachnospiraceae	Dorea_A	Dorea_A longicatena_B
MGS.185_3	Illeum	Bacteria	Firmicutes_A	Clostridia	Lachnospiraceae	Dorea_A	Dorea_A longicatena_B
MGS.185_4	Illeum	Bacteria	Firmicutes_A	Clostridia	Lachnospiraceae	Dorea_A	Dorea_A longicatena_B
MGS.186_1	Illeum	Bacteria	Bacteroidota	Bacteroidia	Bacteroidaceae	Phocaeicola	?
MGS.186_3	Illeum	Bacteria	Bacteroidota	Bacteroidia	Bacteroidaceae	Phocaeicola	?
MGS.186_4	Illeum	Bacteria	Bacteroidota	Bacteroidia	Bacteroidaceae	Phocaeicola	?
MGS.188_2	Illeum	Bacteria	Firmicutes_A	Clostridia	Lachnospiraceae	Oliverpabstia	Oliverpabstia intestinalis
MGS.188_3	Illeum	Bacteria	Firmicutes_A	Clostridia	Lachnospiraceae	Oliverpabstia	Oliverpabstia intestinalis
MGS.188_4	Illeum	Bacteria	Firmicutes_A	Clostridia	Lachnospiraceae	Oliverpabstia	Oliverpabstia intestinalis
MGS.188_5	Illeum	Bacteria	Firmicutes_A	Clostridia	Lachnospiraceae	Oliverpabstia	Oliverpabstia intestinalis
MGS.188_6	Illeum	Bacteria	Firmicutes_A	Clostridia	Lachnospiraceae	Oliverpabstia	Oliverpabstia intestinalis
MGS.188_8	Illeum	Bacteria	Firmicutes_A	Clostridia	Lachnospiraceae	Oliverpabstia	Oliverpabstia intestinalis
MGS.188_9	Illeum	Bacteria	Firmicutes_A	Clostridia	Lachnospiraceae	Oliverpabstia	Oliverpabstia intestinalis
MGS.189_1	Illeum	Bacteria	Actinobacteriota	Coriobacteriia	Atopobiaceae	Lancefieldella	Lancefieldella sp000411555
MGS.189_2	Illeum	Bacteria	Actinobacteriota	Coriobacteriia	Atopobiaceae	Lancefieldella	Lancefieldella sp000411555
MGS.189_3	Illeum	Bacteria	Actinobacteriota	Coriobacteriia	Atopobiaceae	Lancefieldella	Lancefieldella sp000411555
MGS.189_4	Illeum	Bacteria	Actinobacteriota	Coriobacteriia	Atopobiaceae	Lancefieldella	Lancefieldella sp000411555
MGS.189_5	Illeum	Bacteria	Actinobacteriota	Coriobacteriia	Atopobiaceae	Lancefieldella	Lancefieldella sp000411555
MGS.19_1	Illeum	Bacteria	Proteobacteria	Gammaproteobacteria	Enterobacteriaceae	Proteus	Proteus mirabilis
MGS.19_2	Illeum	Bacteria	Proteobacteria	Gammaproteobacteria	Enterobacteriaceae	Proteus	Proteus mirabilis
MGS.19_3	Illeum	Bacteria	Proteobacteria	Gammaproteobacteria	Enterobacteriaceae	Proteus	Proteus mirabilis
MGS.190_1	Illeum	Bacteria	Actinobacteriota	Actinomycetia	Micrococcaceae	Rothia	Rothia aeria
MGS.190_10	Illeum	Bacteria	Actinobacteriota	Actinomycetia	Micrococcaceae	Rothia	Rothia aeria
MGS.190_11	Illeum	Bacteria	Actinobacteriota	Actinomycetia	Micrococcaceae	Rothia	Rothia aeria
MGS.190_12	Illeum	Bacteria	Actinobacteriota	Actinomycetia	Micrococcaceae	Rothia	Rothia aeria
MGS.190_13	Illeum	Bacteria	Actinobacteriota	Actinomycetia	Micrococcaceae	Rothia	Rothia aeria
MGS.190_14	Illeum	Bacteria	Actinobacteriota	Actinomycetia	Micrococcaceae	Rothia	Rothia aeria
MGS.190_15	Illeum	Bacteria	Actinobacteriota	Actinomycetia	Micrococcaceae	Rothia	Rothia aeria
MGS.190_16	Illeum	Bacteria	Actinobacteriota	Actinomycetia	Micrococcaceae	Rothia	Rothia aeria
MGS.190_17	Illeum	Bacteria	Actinobacteriota	Actinomycetia	Micrococcaceae	Rothia	Rothia aeria
MGS.190_2	Illeum	Bacteria	Actinobacteriota	Actinomycetia	Micrococcaceae	Rothia	Rothia aeria
MGS.190_26	Illeum	Bacteria	Actinobacteriota	Actinomycetia	Micrococcaceae	Rothia	Rothia aeria
MGS.190_28	Illeum	Bacteria	Actinobacteriota	Actinomycetia	Micrococcaceae	Rothia	Rothia aeria
MGS.190_29	Illeum	Bacteria	Actinobacteriota	Actinomycetia	Micrococcaceae	Rothia	Rothia aeria
MGS.190_5	Illeum	Bacteria	Actinobacteriota	Actinomycetia	Micrococcaceae	Rothia	Rothia aeria
MGS.190_7	Illeum	Bacteria	Actinobacteriota	Actinomycetia	Micrococcaceae	Rothia	Rothia aeria
MGS.190_9	Illeum	Bacteria	Actinobacteriota	Actinomycetia	Micrococcaceae	Rothia	Rothia aeria
MGS.191_1	Illeum	Bacteria	Firmicutes	Bacilli	Streptococcaceae	Streptococcus	Streptococcus sobrinus
MGS.192_1	Illeum	Bacteria	Bacteroidota	Bacteroidia	Bacteroidaceae	Bacteroides	Bacteroides fragilis_A
MGS.192_3	Illeum	Bacteria	Bacteroidota	Bacteroidia	Bacteroidaceae	Bacteroides	Bacteroides fragilis_A
MGS.192_4	Illeum	Bacteria	Bacteroidota	Bacteroidia	Bacteroidaceae	Bacteroides	Bacteroides fragilis_A
MGS.194_1	Illeum	Bacteria	Proteobacteria	Gammaproteobacteria	Burkholderiaceae	Sutterella	Sutterella wadsworthensis
MGS.195_1	Illeum	Bacteria	Firmicutes_A	Clostridia	Peptostreptococcaceae	Terrisporobacter	?
MGS.195_2	Illeum	Bacteria	Firmicutes_A	Clostridia	Peptostreptococcaceae	Terrisporobacter	?
MGS.198_1	Illeum	Bacteria	Firmicutes	Bacilli	Lactobacillaceae	Weissella	Weissella confusa
MGS.198_2	Illeum	Bacteria	Firmicutes	Bacilli	Lactobacillaceae	Weissella	Weissella confusa
MGS.198_3	Illeum	Bacteria	Firmicutes	Bacilli	Lactobacillaceae	Weissella	Weissella confusa
MGS.198_4	Illeum	Bacteria	Firmicutes	Bacilli	Lactobacillaceae	Weissella	Weissella confusa
MGS.199_1	Illeum	Bacteria	Bacteroidota	Bacteroidia	Bacteroidaceae	Bacteroides	Bacteroides stercoris
MGS.199_3	Illeum	Bacteria	Bacteroidota	Bacteroidia	Bacteroidaceae	Bacteroides	Bacteroides stercoris
MGS.199_4	Illeum	Bacteria	Bacteroidota	Bacteroidia	Bacteroidaceae	Bacteroides	Bacteroides stercoris
MGS.199_5	Illeum	Bacteria	Bacteroidota	Bacteroidia	Bacteroidaceae	Bacteroides	Bacteroides stercoris
MGS.199_6	Illeum	Bacteria	Bacteroidota	Bacteroidia	Bacteroidaceae	Bacteroides	Bacteroides stercoris
MGS.20_1	Illeum	Bacteria	Firmicutes_A	Clostridia	Lachnospiraceae	CAG-603	CAG-603 sp900066105
MGS.20_10	Illeum	Bacteria	Firmicutes_A	Clostridia	Lachnospiraceae	CAG-603	CAG-603 sp900066105
MGS.20_11	Illeum	Bacteria	Firmicutes_A	Clostridia	Lachnospiraceae	CAG-603	CAG-603 sp900066105
MGS.20_12	Illeum	Bacteria	Firmicutes_A	Clostridia	Lachnospiraceae	CAG-603	CAG-603 sp900066105
MGS.20_2	Illeum	Bacteria	Firmicutes_A	Clostridia	Lachnospiraceae	CAG-603	CAG-603 sp900066105
MGS.20_3	Illeum	Bacteria	Firmicutes_A	Clostridia	Lachnospiraceae	CAG-603	CAG-603 sp900066105
MGS.20_4	Illeum	Bacteria	Firmicutes_A	Clostridia	Lachnospiraceae	CAG-603	CAG-603 sp900066105
MGS.20_5	Illeum	Bacteria	Firmicutes_A	Clostridia	Lachnospiraceae	CAG-603	CAG-603 sp900066105
MGS.20_6	Illeum	Bacteria	Firmicutes_A	Clostridia	Lachnospiraceae	CAG-603	CAG-603 sp900066105
MGS.20_7	Illeum	Bacteria	Firmicutes_A	Clostridia	Lachnospiraceae	CAG-603	CAG-603 sp900066105
MGS.20_8	Illeum	Bacteria	Firmicutes_A	Clostridia	Lachnospiraceae	CAG-603	CAG-603 sp900066105
MGS.205_1	Illeum	Bacteria	Bacteroidota	Bacteroidia	Porphyromonadaceae	Porphyromonas	Porphyromonas pasteri
MGS.206_1	Illeum	Bacteria	Firmicutes_A	Clostridia	Lachnospiraceae	RUG115	RUG115 sp900066395
MGS.206_2	Illeum	Bacteria	Firmicutes_A	Clostridia	Lachnospiraceae	RUG115	RUG115 sp900066395
MGS.207_2	Illeum	Bacteria	Firmicutes_A	Clostridia	Lachnospiraceae	Lachnoanaerobaculum	Lachnoanaerobaculum orale
MGS.207_21	Illeum	Bacteria	Firmicutes_A	Clostridia	Lachnospiraceae	Lachnoanaerobaculum	Lachnoanaerobaculum orale
MGS.207_24	Illeum	Bacteria	Firmicutes_A	Clostridia	Lachnospiraceae	Lachnoanaerobaculum	Lachnoanaerobaculum orale
MGS.207_25	Illeum	Bacteria	Firmicutes_A	Clostridia	Lachnospiraceae	Lachnoanaerobaculum	Lachnoanaerobaculum orale
MGS.207_29	Illeum	Bacteria	Firmicutes_A	Clostridia	Lachnospiraceae	Lachnoanaerobaculum	Lachnoanaerobaculum orale
MGS.207_32	Illeum	Bacteria	Firmicutes_A	Clostridia	Lachnospiraceae	Lachnoanaerobaculum	Lachnoanaerobaculum orale
MGS.207_34	Illeum	Bacteria	Firmicutes_A	Clostridia	Lachnospiraceae	Lachnoanaerobaculum	Lachnoanaerobaculum orale
MGS.209_1	Illeum	Bacteria	Actinobacteriota	Coriobacteriia	Atopobiaceae	Fannyhessea	Fannyhessea vaginae
MGS.21_1	Illeum	Bacteria	Firmicutes	Bacilli	Lactobacillaceae	Limosilactobacillus	Limosilactobacillus fermentum
MGS.21_10	Illeum	Bacteria	Firmicutes	Bacilli	Lactobacillaceae	Limosilactobacillus	Limosilactobacillus fermentum
MGS.21_5	Illeum	Bacteria	Firmicutes	Bacilli	Lactobacillaceae	Limosilactobacillus	Limosilactobacillus fermentum
MGS.210_1	Illeum	Bacteria	Proteobacteria	Gammaproteobacteria	Enterobacteriaceae	Serratia	Serratia marcescens_K
MGS.212_1	Illeum	Bacteria	Firmicutes_A	Clostridia	Lachnospiraceae	Mediterraneibacter	Mediterraneibacter torques
MGS.213_10	Illeum	Bacteria	Bacteroidota	Bacteroidia	Bacteroidaceae	Prevotella	Prevotella jejuni
MGS.213_8	Illeum	Bacteria	Bacteroidota	Bacteroidia	Bacteroidaceae	Prevotella	Prevotella jejuni
MGS.214_5	Illeum	Bacteria	Bacteroidota	Bacteroidia	Bacteroidaceae	Prevotella	Prevotella aurantiaca
MGS.215_2	Illeum	Bacteria	Firmicutes_A	Clostridia	Lachnospiraceae	Ventrimonas	Ventrimonas sp900555625
MGS.215_3	Illeum	Bacteria	Firmicutes_A	Clostridia	Lachnospiraceae	Ventrimonas	Ventrimonas sp900555625
MGS.215_4	Illeum	Bacteria	Firmicutes_A	Clostridia	Lachnospiraceae	Ventrimonas	Ventrimonas sp900555625
MGS.215_5	Illeum	Bacteria	Firmicutes_A	Clostridia	Lachnospiraceae	Ventrimonas	Ventrimonas sp900555625
MGS.216_2	Illeum	Bacteria	Bacteroidota	Bacteroidia	Weeksellaceae	JABCPE02	JABCPE02 sp013333255
MGS.220_1	Illeum	Bacteria	Firmicutes_A	Clostridia	Clostridiaceae	Clostridium_P	Clostridium_P perfringens
MGS.220_2	Illeum	Bacteria	Firmicutes_A	Clostridia	Clostridiaceae	Clostridium_P	Clostridium_P perfringens
MGS.221_1	Illeum	Bacteria	Firmicutes_C	Negativicutes	Veillonellaceae	Veillonella	Veillonella sp900550455
MGS.222_1	Illeum	Bacteria	Bacteroidota	Bacteroidia	Bacteroidaceae	Phocaeicola	Phocaeicola vulgatus
MGS.222_10	Illeum	Bacteria	Bacteroidota	Bacteroidia	Bacteroidaceae	Phocaeicola	Phocaeicola vulgatus
MGS.222_11	Illeum	Bacteria	Bacteroidota	Bacteroidia	Bacteroidaceae	Phocaeicola	Phocaeicola vulgatus
MGS.222_12	Illeum	Bacteria	Bacteroidota	Bacteroidia	Bacteroidaceae	Phocaeicola	Phocaeicola vulgatus
MGS.222_13	Illeum	Bacteria	Bacteroidota	Bacteroidia	Bacteroidaceae	Phocaeicola	Phocaeicola vulgatus
MGS.222_14	Illeum	Bacteria	Bacteroidota	Bacteroidia	Bacteroidaceae	Phocaeicola	Phocaeicola vulgatus
MGS.222_3	Illeum	Bacteria	Bacteroidota	Bacteroidia	Bacteroidaceae	Phocaeicola	Phocaeicola vulgatus
MGS.222_4	Illeum	Bacteria	Bacteroidota	Bacteroidia	Bacteroidaceae	Phocaeicola	Phocaeicola vulgatus
MGS.222_6	Illeum	Bacteria	Bacteroidota	Bacteroidia	Bacteroidaceae	Phocaeicola	Phocaeicola vulgatus
MGS.222_8	Illeum	Bacteria	Bacteroidota	Bacteroidia	Bacteroidaceae	Phocaeicola	Phocaeicola vulgatus
MGS.222_9	Illeum	Bacteria	Bacteroidota	Bacteroidia	Bacteroidaceae	Phocaeicola	Phocaeicola vulgatus
MGS.223_1	Illeum	Bacteria	Firmicutes_A	Clostridia	Lachnospiraceae	Blautia_A	?
MGS.223_10	Illeum	Bacteria	Firmicutes_A	Clostridia	Lachnospiraceae	Blautia_A	?
MGS.223_11	Illeum	Bacteria	Firmicutes_A	Clostridia	Lachnospiraceae	Blautia_A	?
MGS.223_12	Illeum	Bacteria	Firmicutes_A	Clostridia	Lachnospiraceae	Blautia_A	?
MGS.223_13	Illeum	Bacteria	Firmicutes_A	Clostridia	Lachnospiraceae	Blautia_A	?
MGS.223_14	Illeum	Bacteria	Firmicutes_A	Clostridia	Lachnospiraceae	Blautia_A	?
MGS.223_16	Illeum	Bacteria	Firmicutes_A	Clostridia	Lachnospiraceae	Blautia_A	?
MGS.223_3	Illeum	Bacteria	Firmicutes_A	Clostridia	Lachnospiraceae	Blautia_A	?
MGS.223_4	Illeum	Bacteria	Firmicutes_A	Clostridia	Lachnospiraceae	Blautia_A	?
MGS.223_6	Illeum	Bacteria	Firmicutes_A	Clostridia	Lachnospiraceae	Blautia_A	?
MGS.223_7	Illeum	Bacteria	Firmicutes_A	Clostridia	Lachnospiraceae	Blautia_A	?
MGS.223_8	Illeum	Bacteria	Firmicutes_A	Clostridia	Lachnospiraceae	Blautia_A	?
MGS.224_1	Illeum	Bacteria	Actinobacteriota	Actinomycetia	Actinomycetaceae	Actinomyces	Actinomyces sp002999235
MGS.224_2	Illeum	Bacteria	Actinobacteriota	Actinomycetia	Actinomycetaceae	Actinomyces	Actinomyces sp002999235
MGS.225_1	Illeum	Bacteria	Bacteroidota	Bacteroidia	Bacteroidaceae	Bacteroides	Bacteroides clarus
MGS.225_3	Illeum	Bacteria	Bacteroidota	Bacteroidia	Bacteroidaceae	Bacteroides	Bacteroides clarus
MGS.226_1	Illeum	Bacteria	Firmicutes_A	Clostridia	Lachnospiraceae	KLE1615	KLE1615 sp900066985
MGS.226_5	Illeum	Bacteria	Firmicutes_A	Clostridia	Lachnospiraceae	KLE1615	KLE1615 sp900066985
MGS.226_6	Illeum	Bacteria	Firmicutes_A	Clostridia	Lachnospiraceae	KLE1615	KLE1615 sp900066985
MGS.226_7	Illeum	Bacteria	Firmicutes_A	Clostridia	Lachnospiraceae	KLE1615	KLE1615 sp900066985
MGS.228_1	Illeum	Bacteria	Firmicutes_A	Clostridia	Lachnospiraceae	Lachnospira	Lachnospira sp000437735
MGS.229_1	Illeum	Bacteria	Firmicutes_A	Clostridia	Lachnospiraceae	Lachnoanaerobaculum	Lachnoanaerobaculum sp000209465
MGS.229_2	Illeum	Bacteria	Firmicutes_A	Clostridia	Lachnospiraceae	Lachnoanaerobaculum	Lachnoanaerobaculum sp000209465
MGS.229_3	Illeum	Bacteria	Firmicutes_A	Clostridia	Lachnospiraceae	Lachnoanaerobaculum	Lachnoanaerobaculum sp000209465
MGS.229_6	Illeum	Bacteria	Firmicutes_A	Clostridia	Lachnospiraceae	Lachnoanaerobaculum	Lachnoanaerobaculum sp000209465
MGS.23_1	Illeum	Bacteria	Actinobacteriota	Coriobacteriia	Atopobiaceae	Lancefieldella	Lancefieldella rimae
MGS.23_11	Illeum	Bacteria	Actinobacteriota	Coriobacteriia	Atopobiaceae	Lancefieldella	Lancefieldella rimae
MGS.23_2	Illeum	Bacteria	Actinobacteriota	Coriobacteriia	Atopobiaceae	Lancefieldella	Lancefieldella rimae
MGS.23_4	Illeum	Bacteria	Actinobacteriota	Coriobacteriia	Atopobiaceae	Lancefieldella	Lancefieldella rimae
MGS.23_5	Illeum	Bacteria	Actinobacteriota	Coriobacteriia	Atopobiaceae	Lancefieldella	Lancefieldella rimae
MGS.23_8	Illeum	Bacteria	Actinobacteriota	Coriobacteriia	Atopobiaceae	Lancefieldella	Lancefieldella rimae
MGS.23_9	Illeum	Bacteria	Actinobacteriota	Coriobacteriia	Atopobiaceae	Lancefieldella	Lancefieldella rimae
MGS.231_1	Illeum	Bacteria	Firmicutes	Bacilli	Streptococcaceae	Streptococcus	Streptococcus infantarius
MGS.231_2	Illeum	Bacteria	Firmicutes	Bacilli	Streptococcaceae	Streptococcus	Streptococcus infantarius
MGS.231_5	Illeum	Bacteria	Firmicutes	Bacilli	Streptococcaceae	Streptococcus	Streptococcus infantarius
MGS.232_1	Illeum	Bacteria	Firmicutes_A	Clostridia	Clostridiaceae	Clostridium	Clostridium sp015555905
MGS.232_2	Illeum	Bacteria	Firmicutes_A	Clostridia	Clostridiaceae	Clostridium	Clostridium sp015555905
MGS.232_3	Illeum	Bacteria	Firmicutes_A	Clostridia	Clostridiaceae	Clostridium	Clostridium sp015555905
MGS.233_1	Illeum	Bacteria	Firmicutes_A	Clostridia	Ruminococcaceae	Faecalibacterium	Faecalibacterium prausnitzii_C
MGS.233_2	Illeum	Bacteria	Firmicutes_A	Clostridia	Ruminococcaceae	Faecalibacterium	Faecalibacterium prausnitzii_C
MGS.233_4	Illeum	Bacteria	Firmicutes_A	Clostridia	Ruminococcaceae	Faecalibacterium	Faecalibacterium prausnitzii_C
MGS.233_5	Illeum	Bacteria	Firmicutes_A	Clostridia	Ruminococcaceae	Faecalibacterium	Faecalibacterium prausnitzii_C
MGS.233_7	Illeum	Bacteria	Firmicutes_A	Clostridia	Ruminococcaceae	Faecalibacterium	Faecalibacterium prausnitzii_C
MGS.233_8	Illeum	Bacteria	Firmicutes_A	Clostridia	Ruminococcaceae	Faecalibacterium	Faecalibacterium prausnitzii_C
MGS.234_5	Illeum	Bacteria	Firmicutes_A	Clostridia	Lachnospiraceae	Lachnospira	Lachnospira sp000436535
MGS.234_6	Illeum	Bacteria	Firmicutes_A	Clostridia	Lachnospiraceae	Lachnospira	Lachnospira sp000436535
MGS.235_1	Illeum	Bacteria	Firmicutes_A	Clostridia	Lachnospiraceae	Catonella	?
MGS.235_2	Illeum	Bacteria	Firmicutes_A	Clostridia	Lachnospiraceae	Catonella	?
MGS.235_3	Illeum	Bacteria	Firmicutes_A	Clostridia	Lachnospiraceae	Catonella	?
MGS.235_5	Illeum	Bacteria	Firmicutes_A	Clostridia	Lachnospiraceae	Catonella	?
MGS.235_6	Illeum	Bacteria	Firmicutes_A	Clostridia	Lachnospiraceae	Catonella	?
MGS.235_7	Illeum	Bacteria	Firmicutes_A	Clostridia	Lachnospiraceae	Catonella	?
MGS.237_1	Illeum	Bacteria	Firmicutes_A	Clostridia	Acutalibacteraceae	CAG-177	?
MGS.238_10	Illeum	Bacteria	Firmicutes	Bacilli	Gemellaceae	Gemella	Gemella morbillorum
MGS.238_12	Illeum	Bacteria	Firmicutes	Bacilli	Gemellaceae	Gemella	Gemella morbillorum
MGS.238_13	Illeum	Bacteria	Firmicutes	Bacilli	Gemellaceae	Gemella	Gemella morbillorum
MGS.238_4	Illeum	Bacteria	Firmicutes	Bacilli	Gemellaceae	Gemella	Gemella morbillorum
MGS.238_6	Illeum	Bacteria	Firmicutes	Bacilli	Gemellaceae	Gemella	Gemella morbillorum
MGS.239_1	Illeum	Bacteria	Proteobacteria	Gammaproteobacteria	Neisseriaceae	Neisseria	Neisseria elongata
MGS.239_12	Illeum	Bacteria	Proteobacteria	Gammaproteobacteria	Neisseriaceae	Neisseria	Neisseria elongata
MGS.239_13	Illeum	Bacteria	Proteobacteria	Gammaproteobacteria	Neisseriaceae	Neisseria	Neisseria elongata
MGS.239_15	Illeum	Bacteria	Proteobacteria	Gammaproteobacteria	Neisseriaceae	Neisseria	Neisseria elongata
MGS.239_2	Illeum	Bacteria	Proteobacteria	Gammaproteobacteria	Neisseriaceae	Neisseria	Neisseria elongata
MGS.239_6	Illeum	Bacteria	Proteobacteria	Gammaproteobacteria	Neisseriaceae	Neisseria	Neisseria elongata
MGS.239_7	Illeum	Bacteria	Proteobacteria	Gammaproteobacteria	Neisseriaceae	Neisseria	Neisseria elongata
MGS.24_1	Illeum	Bacteria	Proteobacteria	Gammaproteobacteria	Moraxellaceae	Acinetobacter	Acinetobacter beijerinckii
MGS.24_2	Illeum	Bacteria	Proteobacteria	Gammaproteobacteria	Moraxellaceae	Acinetobacter	Acinetobacter beijerinckii
MGS.24_3	Illeum	Bacteria	Proteobacteria	Gammaproteobacteria	Moraxellaceae	Acinetobacter	Acinetobacter beijerinckii
MGS.24_4	Illeum	Bacteria	Proteobacteria	Gammaproteobacteria	Moraxellaceae	Acinetobacter	Acinetobacter beijerinckii
MGS.240_1	Illeum	Bacteria	Firmicutes_A	Clostridia	Lachnospiraceae	CAG-882	CAG-882 sp000435595
MGS.241_14	Illeum	Bacteria	Proteobacteria	Gammaproteobacteria	Pasteurellaceae	Aggregatibacter	Aggregatibacter segnis
MGS.241_15	Illeum	Bacteria	Proteobacteria	Gammaproteobacteria	Pasteurellaceae	Aggregatibacter	Aggregatibacter segnis
MGS.241_18	Illeum	Bacteria	Proteobacteria	Gammaproteobacteria	Pasteurellaceae	Aggregatibacter	Aggregatibacter segnis
MGS.241_19	Illeum	Bacteria	Proteobacteria	Gammaproteobacteria	Pasteurellaceae	Aggregatibacter	Aggregatibacter segnis
MGS.241_3	Illeum	Bacteria	Proteobacteria	Gammaproteobacteria	Pasteurellaceae	Aggregatibacter	Aggregatibacter segnis
MGS.241_6	Illeum	Bacteria	Proteobacteria	Gammaproteobacteria	Pasteurellaceae	Aggregatibacter	Aggregatibacter segnis
MGS.242_1	Illeum	Bacteria	Firmicutes_A	Clostridia	Lachnospiraceae	Dorea_A	Dorea_A longicatena
MGS.242_2	Illeum	Bacteria	Firmicutes_A	Clostridia	Lachnospiraceae	Dorea_A	Dorea_A longicatena
MGS.242_4	Illeum	Bacteria	Firmicutes_A	Clostridia	Lachnospiraceae	Dorea_A	Dorea_A longicatena
MGS.243_1	Illeum	Bacteria	Firmicutes	Bacilli	Gemellaceae	Gemella	Gemella massiliensis
MGS.244_1	Illeum	Bacteria	Actinobacteriota	Actinomycetia	Actinomycetaceae	Actinomyces	Actinomyces gerencseriae
MGS.244_10	Illeum	Bacteria	Actinobacteriota	Actinomycetia	Actinomycetaceae	Actinomyces	Actinomyces gerencseriae
MGS.244_11	Illeum	Bacteria	Actinobacteriota	Actinomycetia	Actinomycetaceae	Actinomyces	Actinomyces gerencseriae
MGS.244_12	Illeum	Bacteria	Actinobacteriota	Actinomycetia	Actinomycetaceae	Actinomyces	Actinomyces gerencseriae
MGS.244_13	Illeum	Bacteria	Actinobacteriota	Actinomycetia	Actinomycetaceae	Actinomyces	Actinomyces gerencseriae
MGS.244_14	Illeum	Bacteria	Actinobacteriota	Actinomycetia	Actinomycetaceae	Actinomyces	Actinomyces gerencseriae
MGS.244_15	Illeum	Bacteria	Actinobacteriota	Actinomycetia	Actinomycetaceae	Actinomyces	Actinomyces gerencseriae
MGS.244_16	Illeum	Bacteria	Actinobacteriota	Actinomycetia	Actinomycetaceae	Actinomyces	Actinomyces gerencseriae
MGS.244_17	Illeum	Bacteria	Actinobacteriota	Actinomycetia	Actinomycetaceae	Actinomyces	Actinomyces gerencseriae
MGS.244_18	Illeum	Bacteria	Actinobacteriota	Actinomycetia	Actinomycetaceae	Actinomyces	Actinomyces gerencseriae
MGS.244_19	Illeum	Bacteria	Actinobacteriota	Actinomycetia	Actinomycetaceae	Actinomyces	Actinomyces gerencseriae
MGS.244_2	Illeum	Bacteria	Actinobacteriota	Actinomycetia	Actinomycetaceae	Actinomyces	Actinomyces gerencseriae
MGS.244_20	Illeum	Bacteria	Actinobacteriota	Actinomycetia	Actinomycetaceae	Actinomyces	Actinomyces gerencseriae
MGS.244_21	Illeum	Bacteria	Actinobacteriota	Actinomycetia	Actinomycetaceae	Actinomyces	Actinomyces gerencseriae
MGS.244_22	Illeum	Bacteria	Actinobacteriota	Actinomycetia	Actinomycetaceae	Actinomyces	Actinomyces gerencseriae
MGS.244_23	Illeum	Bacteria	Actinobacteriota	Actinomycetia	Actinomycetaceae	Actinomyces	Actinomyces gerencseriae
MGS.244_24	Illeum	Bacteria	Actinobacteriota	Actinomycetia	Actinomycetaceae	Actinomyces	Actinomyces gerencseriae
MGS.244_25	Illeum	Bacteria	Actinobacteriota	Actinomycetia	Actinomycetaceae	Actinomyces	Actinomyces gerencseriae
MGS.244_26	Illeum	Bacteria	Actinobacteriota	Actinomycetia	Actinomycetaceae	Actinomyces	Actinomyces gerencseriae
MGS.244_27	Illeum	Bacteria	Actinobacteriota	Actinomycetia	Actinomycetaceae	Actinomyces	Actinomyces gerencseriae
MGS.244_28	Illeum	Bacteria	Actinobacteriota	Actinomycetia	Actinomycetaceae	Actinomyces	Actinomyces gerencseriae
MGS.244_29	Illeum	Bacteria	Actinobacteriota	Actinomycetia	Actinomycetaceae	Actinomyces	Actinomyces gerencseriae
MGS.244_3	Illeum	Bacteria	Actinobacteriota	Actinomycetia	Actinomycetaceae	Actinomyces	Actinomyces gerencseriae
MGS.244_30	Illeum	Bacteria	Actinobacteriota	Actinomycetia	Actinomycetaceae	Actinomyces	Actinomyces gerencseriae
MGS.244_31	Illeum	Bacteria	Actinobacteriota	Actinomycetia	Actinomycetaceae	Actinomyces	Actinomyces gerencseriae
MGS.244_32	Illeum	Bacteria	Actinobacteriota	Actinomycetia	Actinomycetaceae	Actinomyces	Actinomyces gerencseriae
MGS.244_33	Illeum	Bacteria	Actinobacteriota	Actinomycetia	Actinomycetaceae	Actinomyces	Actinomyces gerencseriae
MGS.244_34	Illeum	Bacteria	Actinobacteriota	Actinomycetia	Actinomycetaceae	Actinomyces	Actinomyces gerencseriae
MGS.244_35	Illeum	Bacteria	Actinobacteriota	Actinomycetia	Actinomycetaceae	Actinomyces	Actinomyces gerencseriae
MGS.244_36	Illeum	Bacteria	Actinobacteriota	Actinomycetia	Actinomycetaceae	Actinomyces	Actinomyces gerencseriae
MGS.244_38	Illeum	Bacteria	Actinobacteriota	Actinomycetia	Actinomycetaceae	Actinomyces	Actinomyces gerencseriae
MGS.244_39	Illeum	Bacteria	Actinobacteriota	Actinomycetia	Actinomycetaceae	Actinomyces	Actinomyces gerencseriae
MGS.244_4	Illeum	Bacteria	Actinobacteriota	Actinomycetia	Actinomycetaceae	Actinomyces	Actinomyces gerencseriae
MGS.244_40	Illeum	Bacteria	Actinobacteriota	Actinomycetia	Actinomycetaceae	Actinomyces	Actinomyces gerencseriae
MGS.244_41	Illeum	Bacteria	Actinobacteriota	Actinomycetia	Actinomycetaceae	Actinomyces	Actinomyces gerencseriae
MGS.244_42	Illeum	Bacteria	Actinobacteriota	Actinomycetia	Actinomycetaceae	Actinomyces	Actinomyces gerencseriae
MGS.244_43	Illeum	Bacteria	Actinobacteriota	Actinomycetia	Actinomycetaceae	Actinomyces	Actinomyces gerencseriae
MGS.244_44	Illeum	Bacteria	Actinobacteriota	Actinomycetia	Actinomycetaceae	Actinomyces	Actinomyces gerencseriae
MGS.244_45	Illeum	Bacteria	Actinobacteriota	Actinomycetia	Actinomycetaceae	Actinomyces	Actinomyces gerencseriae
MGS.244_46	Illeum	Bacteria	Actinobacteriota	Actinomycetia	Actinomycetaceae	Actinomyces	Actinomyces gerencseriae
MGS.244_47	Illeum	Bacteria	Actinobacteriota	Actinomycetia	Actinomycetaceae	Actinomyces	Actinomyces gerencseriae
MGS.244_48	Illeum	Bacteria	Actinobacteriota	Actinomycetia	Actinomycetaceae	Actinomyces	Actinomyces gerencseriae
MGS.244_49	Illeum	Bacteria	Actinobacteriota	Actinomycetia	Actinomycetaceae	Actinomyces	Actinomyces gerencseriae
MGS.244_5	Illeum	Bacteria	Actinobacteriota	Actinomycetia	Actinomycetaceae	Actinomyces	Actinomyces gerencseriae
MGS.244_50	Illeum	Bacteria	Actinobacteriota	Actinomycetia	Actinomycetaceae	Actinomyces	Actinomyces gerencseriae
MGS.244_6	Illeum	Bacteria	Actinobacteriota	Actinomycetia	Actinomycetaceae	Actinomyces	Actinomyces gerencseriae
MGS.244_7	Illeum	Bacteria	Actinobacteriota	Actinomycetia	Actinomycetaceae	Actinomyces	Actinomyces gerencseriae
MGS.244_8	Illeum	Bacteria	Actinobacteriota	Actinomycetia	Actinomycetaceae	Actinomyces	Actinomyces gerencseriae
MGS.244_9	Illeum	Bacteria	Actinobacteriota	Actinomycetia	Actinomycetaceae	Actinomyces	Actinomyces gerencseriae
MGS.245_1	Illeum	Bacteria	Firmicutes_A	Clostridia	Peptostreptococcaceae	Peptostreptococcus	Peptostreptococcus stomatis
MGS.245_11	Illeum	Bacteria	Firmicutes_A	Clostridia	Peptostreptococcaceae	Peptostreptococcus	Peptostreptococcus stomatis
MGS.245_13	Illeum	Bacteria	Firmicutes_A	Clostridia	Peptostreptococcaceae	Peptostreptococcus	Peptostreptococcus stomatis
MGS.245_14	Illeum	Bacteria	Firmicutes_A	Clostridia	Peptostreptococcaceae	Peptostreptococcus	Peptostreptococcus stomatis
MGS.245_15	Illeum	Bacteria	Firmicutes_A	Clostridia	Peptostreptococcaceae	Peptostreptococcus	Peptostreptococcus stomatis
MGS.245_2	Illeum	Bacteria	Firmicutes_A	Clostridia	Peptostreptococcaceae	Peptostreptococcus	Peptostreptococcus stomatis
MGS.245_3	Illeum	Bacteria	Firmicutes_A	Clostridia	Peptostreptococcaceae	Peptostreptococcus	Peptostreptococcus stomatis
MGS.245_4	Illeum	Bacteria	Firmicutes_A	Clostridia	Peptostreptococcaceae	Peptostreptococcus	Peptostreptococcus stomatis
MGS.245_5	Illeum	Bacteria	Firmicutes_A	Clostridia	Peptostreptococcaceae	Peptostreptococcus	Peptostreptococcus stomatis
MGS.245_6	Illeum	Bacteria	Firmicutes_A	Clostridia	Peptostreptococcaceae	Peptostreptococcus	Peptostreptococcus stomatis
MGS.245_7	Illeum	Bacteria	Firmicutes_A	Clostridia	Peptostreptococcaceae	Peptostreptococcus	Peptostreptococcus stomatis
MGS.245_8	Illeum	Bacteria	Firmicutes_A	Clostridia	Peptostreptococcaceae	Peptostreptococcus	Peptostreptococcus stomatis
MGS.245_9	Illeum	Bacteria	Firmicutes_A	Clostridia	Peptostreptococcaceae	Peptostreptococcus	Peptostreptococcus stomatis
MGS.246_1	Illeum	Bacteria	Firmicutes_A	Clostridia	Lachnospiraceae	UMGS1375	UMGS1375 sp900066615
MGS.246_2	Illeum	Bacteria	Firmicutes_A	Clostridia	Lachnospiraceae	UMGS1375	UMGS1375 sp900066615
MGS.246_3	Illeum	Bacteria	Firmicutes_A	Clostridia	Lachnospiraceae	UMGS1375	UMGS1375 sp900066615
MGS.248_7	Illeum	Bacteria	Bacteroidota	Bacteroidia	Bacteroidaceae	Prevotella	Prevotella sp000257925
MGS.248_8	Illeum	Bacteria	Bacteroidota	Bacteroidia	Bacteroidaceae	Prevotella	Prevotella sp000257925
MGS.249_2	Illeum	Bacteria	Proteobacteria	Gammaproteobacteria	Enterobacteriaceae	Klebsiella	Klebsiella michiganensis
MGS.249_3	Illeum	Bacteria	Proteobacteria	Gammaproteobacteria	Enterobacteriaceae	Klebsiella	Klebsiella michiganensis
MGS.25_10	Illeum	Bacteria	Actinobacteriota	Actinomycetia	Micrococcaceae	Rothia	Rothia dentocariosa
MGS.25_15	Illeum	Bacteria	Actinobacteriota	Actinomycetia	Micrococcaceae	Rothia	Rothia dentocariosa
MGS.25_16	Illeum	Bacteria	Actinobacteriota	Actinomycetia	Micrococcaceae	Rothia	Rothia dentocariosa
MGS.25_18	Illeum	Bacteria	Actinobacteriota	Actinomycetia	Micrococcaceae	Rothia	Rothia dentocariosa
MGS.25_23	Illeum	Bacteria	Actinobacteriota	Actinomycetia	Micrococcaceae	Rothia	Rothia dentocariosa
MGS.25_9	Illeum	Bacteria	Actinobacteriota	Actinomycetia	Micrococcaceae	Rothia	Rothia dentocariosa
MGS.250_4	Illeum	Bacteria	Bacteroidota	Bacteroidia	Bacteroidaceae	Alloprevotella	Alloprevotella tannerae_B
MGS.251_1	Illeum	Bacteria	Actinobacteriota	Actinomycetia	Micrococcaceae	Rothia	Rothia mucilaginosa_A
MGS.252_1	Illeum	Bacteria	Firmicutes_A	Clostridia	Lachnospiraceae	Enterocloster	Enterocloster sp900541315
MGS.252_2	Illeum	Bacteria	Firmicutes_A	Clostridia	Lachnospiraceae	Enterocloster	Enterocloster sp900541315
MGS.252_3	Illeum	Bacteria	Firmicutes_A	Clostridia	Lachnospiraceae	Enterocloster	Enterocloster sp900541315
MGS.253_1	Illeum	Bacteria	Firmicutes_A	Clostridia	Lachnospiraceae	Bariatricus	Bariatricus comes
MGS.253_3	Illeum	Bacteria	Firmicutes_A	Clostridia	Lachnospiraceae	Bariatricus	Bariatricus comes
MGS.253_4	Illeum	Bacteria	Firmicutes_A	Clostridia	Lachnospiraceae	Bariatricus	Bariatricus comes
MGS.254_2	Illeum	Bacteria	Bacteroidota	Bacteroidia	Bacteroidaceae	Prevotella	Prevotella copri_A
MGS.254_7	Illeum	Bacteria	Bacteroidota	Bacteroidia	Bacteroidaceae	Prevotella	Prevotella copri_A
MGS.255_1	Illeum	Bacteria	Actinobacteriota	Actinomycetia	Actinomycetaceae	Pauljensenia	Pauljensenia bouchesdurhonensis
MGS.255_2	Illeum	Bacteria	Actinobacteriota	Actinomycetia	Actinomycetaceae	Pauljensenia	Pauljensenia bouchesdurhonensis
MGS.255_3	Illeum	Bacteria	Actinobacteriota	Actinomycetia	Actinomycetaceae	Pauljensenia	Pauljensenia bouchesdurhonensis
MGS.255_4	Illeum	Bacteria	Actinobacteriota	Actinomycetia	Actinomycetaceae	Pauljensenia	Pauljensenia bouchesdurhonensis
MGS.256_1	Illeum	Bacteria	Firmicutes_A	Clostridia	Lachnospiraceae	Blautia_A	Blautia_A sp900066335
MGS.256_3	Illeum	Bacteria	Firmicutes_A	Clostridia	Lachnospiraceae	Blautia_A	Blautia_A sp900066335
MGS.256_6	Illeum	Bacteria	Firmicutes_A	Clostridia	Lachnospiraceae	Blautia_A	Blautia_A sp900066335
MGS.256_7	Illeum	Bacteria	Firmicutes_A	Clostridia	Lachnospiraceae	Blautia_A	Blautia_A sp900066335
MGS.256_8	Illeum	Bacteria	Firmicutes_A	Clostridia	Lachnospiraceae	Blautia_A	Blautia_A sp900066335
MGS.257_1	Illeum	Bacteria	Firmicutes_A	Clostridia	Lachnospiraceae	Blautia_A	Blautia_A sp000285855
MGS.257_2	Illeum	Bacteria	Firmicutes_A	Clostridia	Lachnospiraceae	Blautia_A	Blautia_A sp000285855
MGS.258_1	Illeum	Bacteria	Proteobacteria	Gammaproteobacteria	Pasteurellaceae	Haemophilus_D	Haemophilus_D pittmaniae
MGS.258_11	Illeum	Bacteria	Proteobacteria	Gammaproteobacteria	Pasteurellaceae	Haemophilus_D	Haemophilus_D pittmaniae
MGS.258_12	Illeum	Bacteria	Proteobacteria	Gammaproteobacteria	Pasteurellaceae	Haemophilus_D	Haemophilus_D pittmaniae
MGS.258_13	Illeum	Bacteria	Proteobacteria	Gammaproteobacteria	Pasteurellaceae	Haemophilus_D	Haemophilus_D pittmaniae
MGS.258_14	Illeum	Bacteria	Proteobacteria	Gammaproteobacteria	Pasteurellaceae	Haemophilus_D	Haemophilus_D pittmaniae
MGS.258_15	Illeum	Bacteria	Proteobacteria	Gammaproteobacteria	Pasteurellaceae	Haemophilus_D	Haemophilus_D pittmaniae
MGS.258_17	Illeum	Bacteria	Proteobacteria	Gammaproteobacteria	Pasteurellaceae	Haemophilus_D	Haemophilus_D pittmaniae
MGS.258_2	Illeum	Bacteria	Proteobacteria	Gammaproteobacteria	Pasteurellaceae	Haemophilus_D	Haemophilus_D pittmaniae
MGS.258_3	Illeum	Bacteria	Proteobacteria	Gammaproteobacteria	Pasteurellaceae	Haemophilus_D	Haemophilus_D pittmaniae
MGS.258_4	Illeum	Bacteria	Proteobacteria	Gammaproteobacteria	Pasteurellaceae	Haemophilus_D	Haemophilus_D pittmaniae
MGS.258_5	Illeum	Bacteria	Proteobacteria	Gammaproteobacteria	Pasteurellaceae	Haemophilus_D	Haemophilus_D pittmaniae
MGS.258_6	Illeum	Bacteria	Proteobacteria	Gammaproteobacteria	Pasteurellaceae	Haemophilus_D	Haemophilus_D pittmaniae
MGS.258_7	Illeum	Bacteria	Proteobacteria	Gammaproteobacteria	Pasteurellaceae	Haemophilus_D	Haemophilus_D pittmaniae
MGS.258_8	Illeum	Bacteria	Proteobacteria	Gammaproteobacteria	Pasteurellaceae	Haemophilus_D	Haemophilus_D pittmaniae
MGS.258_9	Illeum	Bacteria	Proteobacteria	Gammaproteobacteria	Pasteurellaceae	Haemophilus_D	Haemophilus_D pittmaniae
MGS.26_1	Illeum	Bacteria	Firmicutes	Bacilli	Bacillaceae	Bacillus	Bacillus subtilis
MGS.260_11	Illeum	Bacteria	Firmicutes_C	Negativicutes	Veillonellaceae	F0422	F0422 sp001553345
MGS.260_12	Illeum	Bacteria	Firmicutes_C	Negativicutes	Veillonellaceae	F0422	F0422 sp001553345
MGS.260_3	Illeum	Bacteria	Firmicutes_C	Negativicutes	Veillonellaceae	F0422	F0422 sp001553345
MGS.260_5	Illeum	Bacteria	Firmicutes_C	Negativicutes	Veillonellaceae	F0422	F0422 sp001553345
MGS.260_9	Illeum	Bacteria	Firmicutes_C	Negativicutes	Veillonellaceae	F0422	F0422 sp001553345
MGS.261_1	Illeum	Bacteria	Actinobacteriota	Actinomycetia	Actinomycetaceae	Pauljensenia	Pauljensenia sp000758755
MGS.261_17	Illeum	Bacteria	Actinobacteriota	Actinomycetia	Actinomycetaceae	Pauljensenia	Pauljensenia sp000758755
MGS.261_2	Illeum	Bacteria	Actinobacteriota	Actinomycetia	Actinomycetaceae	Pauljensenia	Pauljensenia sp000758755
MGS.261_3	Illeum	Bacteria	Actinobacteriota	Actinomycetia	Actinomycetaceae	Pauljensenia	Pauljensenia sp000758755
MGS.261_9	Illeum	Bacteria	Actinobacteriota	Actinomycetia	Actinomycetaceae	Pauljensenia	Pauljensenia sp000758755
MGS.262_10	Illeum	Bacteria	Proteobacteria	Gammaproteobacteria	Enterobacteriaceae	Citrobacter_B	Citrobacter_B koseri
MGS.262_11	Illeum	Bacteria	Proteobacteria	Gammaproteobacteria	Enterobacteriaceae	Citrobacter_B	Citrobacter_B koseri
MGS.262_2	Illeum	Bacteria	Proteobacteria	Gammaproteobacteria	Enterobacteriaceae	Citrobacter_B	Citrobacter_B koseri
MGS.262_7	Illeum	Bacteria	Proteobacteria	Gammaproteobacteria	Enterobacteriaceae	Citrobacter_B	Citrobacter_B koseri
MGS.262_8	Illeum	Bacteria	Proteobacteria	Gammaproteobacteria	Enterobacteriaceae	Citrobacter_B	Citrobacter_B koseri
MGS.263_1	Illeum	Bacteria	Patescibacteria	Saccharimonadia	Saccharimonadaceae	Saccharimonas	Saccharimonas sp018127705
MGS.263_2	Illeum	Bacteria	Patescibacteria	Saccharimonadia	Saccharimonadaceae	Saccharimonas	Saccharimonas sp018127705
MGS.263_4	Illeum	Bacteria	Patescibacteria	Saccharimonadia	Saccharimonadaceae	Saccharimonas	Saccharimonas sp018127705
MGS.264_1	Illeum	Bacteria	Firmicutes_C	Negativicutes	Veillonellaceae	Veillonella	Veillonella tobetsuensis
MGS.264_10	Illeum	Bacteria	Firmicutes_C	Negativicutes	Veillonellaceae	Veillonella	Veillonella tobetsuensis
MGS.264_12	Illeum	Bacteria	Firmicutes_C	Negativicutes	Veillonellaceae	Veillonella	Veillonella tobetsuensis
MGS.264_13	Illeum	Bacteria	Firmicutes_C	Negativicutes	Veillonellaceae	Veillonella	Veillonella tobetsuensis
MGS.264_14	Illeum	Bacteria	Firmicutes_C	Negativicutes	Veillonellaceae	Veillonella	Veillonella tobetsuensis
MGS.264_2	Illeum	Bacteria	Firmicutes_C	Negativicutes	Veillonellaceae	Veillonella	Veillonella tobetsuensis
MGS.264_4	Illeum	Bacteria	Firmicutes_C	Negativicutes	Veillonellaceae	Veillonella	Veillonella tobetsuensis
MGS.264_5	Illeum	Bacteria	Firmicutes_C	Negativicutes	Veillonellaceae	Veillonella	Veillonella tobetsuensis
MGS.264_9	Illeum	Bacteria	Firmicutes_C	Negativicutes	Veillonellaceae	Veillonella	Veillonella tobetsuensis
MGS.265_10	Illeum	Bacteria	Actinobacteriota	Actinomycetia	Actinomycetaceae	Pauljensenia	Pauljensenia sp000278725
MGS.265_11	Illeum	Bacteria	Actinobacteriota	Actinomycetia	Actinomycetaceae	Pauljensenia	Pauljensenia sp000278725
MGS.265_12	Illeum	Bacteria	Actinobacteriota	Actinomycetia	Actinomycetaceae	Pauljensenia	Pauljensenia sp000278725
MGS.265_13	Illeum	Bacteria	Actinobacteriota	Actinomycetia	Actinomycetaceae	Pauljensenia	Pauljensenia sp000278725
MGS.265_14	Illeum	Bacteria	Actinobacteriota	Actinomycetia	Actinomycetaceae	Pauljensenia	Pauljensenia sp000278725
MGS.265_20	Illeum	Bacteria	Actinobacteriota	Actinomycetia	Actinomycetaceae	Pauljensenia	Pauljensenia sp000278725
MGS.265_21	Illeum	Bacteria	Actinobacteriota	Actinomycetia	Actinomycetaceae	Pauljensenia	Pauljensenia sp000278725
MGS.265_25	Illeum	Bacteria	Actinobacteriota	Actinomycetia	Actinomycetaceae	Pauljensenia	Pauljensenia sp000278725
MGS.265_29	Illeum	Bacteria	Actinobacteriota	Actinomycetia	Actinomycetaceae	Pauljensenia	Pauljensenia sp000278725
MGS.265_30	Illeum	Bacteria	Actinobacteriota	Actinomycetia	Actinomycetaceae	Pauljensenia	Pauljensenia sp000278725
MGS.265_32	Illeum	Bacteria	Actinobacteriota	Actinomycetia	Actinomycetaceae	Pauljensenia	Pauljensenia sp000278725
MGS.265_33	Illeum	Bacteria	Actinobacteriota	Actinomycetia	Actinomycetaceae	Pauljensenia	Pauljensenia sp000278725
MGS.265_34	Illeum	Bacteria	Actinobacteriota	Actinomycetia	Actinomycetaceae	Pauljensenia	Pauljensenia sp000278725
MGS.265_35	Illeum	Bacteria	Actinobacteriota	Actinomycetia	Actinomycetaceae	Pauljensenia	Pauljensenia sp000278725
MGS.265_37	Illeum	Bacteria	Actinobacteriota	Actinomycetia	Actinomycetaceae	Pauljensenia	Pauljensenia sp000278725
MGS.265_7	Illeum	Bacteria	Actinobacteriota	Actinomycetia	Actinomycetaceae	Pauljensenia	Pauljensenia sp000278725
MGS.265_8	Illeum	Bacteria	Actinobacteriota	Actinomycetia	Actinomycetaceae	Pauljensenia	Pauljensenia sp000278725
MGS.265_9	Illeum	Bacteria	Actinobacteriota	Actinomycetia	Actinomycetaceae	Pauljensenia	Pauljensenia sp000278725
MGS.266_1	Illeum	Bacteria	Bacteroidota	Bacteroidia	Bacteroidaceae	Bacteroides	Bacteroides thetaiotaomicron
MGS.269_1	Illeum	Bacteria	Firmicutes_A	Clostridia	Peptostreptococcaceae	Peptostreptococcus	Peptostreptococcus sp000758885
MGS.270_1	Illeum	Bacteria	Patescibacteria	Saccharimonadia	Nanosynbacteraceae	Nanosynbacter	?
MGS.270_10	Illeum	Bacteria	Patescibacteria	Saccharimonadia	Nanosynbacteraceae	Nanosynbacter	?
MGS.270_2	Illeum	Bacteria	Patescibacteria	Saccharimonadia	Nanosynbacteraceae	Nanosynbacter	?
MGS.270_3	Illeum	Bacteria	Patescibacteria	Saccharimonadia	Nanosynbacteraceae	Nanosynbacter	?
MGS.270_4	Illeum	Bacteria	Patescibacteria	Saccharimonadia	Nanosynbacteraceae	Nanosynbacter	?
MGS.270_5	Illeum	Bacteria	Patescibacteria	Saccharimonadia	Nanosynbacteraceae	Nanosynbacter	?
MGS.270_6	Illeum	Bacteria	Patescibacteria	Saccharimonadia	Nanosynbacteraceae	Nanosynbacter	?
MGS.270_7	Illeum	Bacteria	Patescibacteria	Saccharimonadia	Nanosynbacteraceae	Nanosynbacter	?
MGS.270_8	Illeum	Bacteria	Patescibacteria	Saccharimonadia	Nanosynbacteraceae	Nanosynbacter	?
MGS.270_9	Illeum	Bacteria	Patescibacteria	Saccharimonadia	Nanosynbacteraceae	Nanosynbacter	?
MGS.271_1	Illeum	Bacteria	Actinobacteriota	Actinomycetia	Actinomycetaceae	Pauljensenia	Pauljensenia sp000308055
MGS.271_10	Illeum	Bacteria	Actinobacteriota	Actinomycetia	Actinomycetaceae	Pauljensenia	Pauljensenia sp000308055
MGS.271_11	Illeum	Bacteria	Actinobacteriota	Actinomycetia	Actinomycetaceae	Pauljensenia	Pauljensenia sp000308055
MGS.271_12	Illeum	Bacteria	Actinobacteriota	Actinomycetia	Actinomycetaceae	Pauljensenia	Pauljensenia sp000308055
MGS.271_14	Illeum	Bacteria	Actinobacteriota	Actinomycetia	Actinomycetaceae	Pauljensenia	Pauljensenia sp000308055
MGS.271_20	Illeum	Bacteria	Actinobacteriota	Actinomycetia	Actinomycetaceae	Pauljensenia	Pauljensenia sp000308055
MGS.271_3	Illeum	Bacteria	Actinobacteriota	Actinomycetia	Actinomycetaceae	Pauljensenia	Pauljensenia sp000308055
MGS.271_5	Illeum	Bacteria	Actinobacteriota	Actinomycetia	Actinomycetaceae	Pauljensenia	Pauljensenia sp000308055
MGS.272_1	Illeum	Bacteria	Firmicutes_C	Negativicutes	Veillonellaceae	F0422	F0422 sp003999875
MGS.272_2	Illeum	Bacteria	Firmicutes_C	Negativicutes	Veillonellaceae	F0422	F0422 sp003999875
MGS.272_3	Illeum	Bacteria	Firmicutes_C	Negativicutes	Veillonellaceae	F0422	F0422 sp003999875
MGS.272_4	Illeum	Bacteria	Firmicutes_C	Negativicutes	Veillonellaceae	F0422	F0422 sp003999875
MGS.272_5	Illeum	Bacteria	Firmicutes_C	Negativicutes	Veillonellaceae	F0422	F0422 sp003999875
MGS.273_1	Illeum	Bacteria	Firmicutes_A	Clostridia	Ruminococcaceae	Faecalibacterium	Faecalibacterium prausnitzii_I
MGS.273_3	Illeum	Bacteria	Firmicutes_A	Clostridia	Ruminococcaceae	Faecalibacterium	Faecalibacterium prausnitzii_I
MGS.273_5	Illeum	Bacteria	Firmicutes_A	Clostridia	Ruminococcaceae	Faecalibacterium	Faecalibacterium prausnitzii_I
MGS.275_1	Illeum	Bacteria	Firmicutes_A	Clostridia	Lachnospiraceae	Anaerostipes	Anaerostipes hadrus_A
MGS.275_2	Illeum	Bacteria	Firmicutes_A	Clostridia	Lachnospiraceae	Anaerostipes	Anaerostipes hadrus_A
MGS.275_3	Illeum	Bacteria	Firmicutes_A	Clostridia	Lachnospiraceae	Anaerostipes	Anaerostipes hadrus_A
MGS.276_1	Illeum	Bacteria	Firmicutes_A	Clostridia	Lachnospiraceae	UMGS1375	UMGS1375 sp900551235
MGS.276_2	Illeum	Bacteria	Firmicutes_A	Clostridia	Lachnospiraceae	UMGS1375	UMGS1375 sp900551235
MGS.276_4	Illeum	Bacteria	Firmicutes_A	Clostridia	Lachnospiraceae	UMGS1375	UMGS1375 sp900551235
MGS.276_5	Illeum	Bacteria	Firmicutes_A	Clostridia	Lachnospiraceae	UMGS1375	UMGS1375 sp900551235
MGS.276_6	Illeum	Bacteria	Firmicutes_A	Clostridia	Lachnospiraceae	UMGS1375	UMGS1375 sp900551235
MGS.276_7	Illeum	Bacteria	Firmicutes_A	Clostridia	Lachnospiraceae	UMGS1375	UMGS1375 sp900551235
MGS.276_8	Illeum	Bacteria	Firmicutes_A	Clostridia	Lachnospiraceae	UMGS1375	UMGS1375 sp900551235
MGS.276_9	Illeum	Bacteria	Firmicutes_A	Clostridia	Lachnospiraceae	UMGS1375	UMGS1375 sp900551235
MGS.277_10	Illeum	Bacteria	Proteobacteria	Gammaproteobacteria	Pasteurellaceae	Haemophilus	?
MGS.277_11	Illeum	Bacteria	Proteobacteria	Gammaproteobacteria	Pasteurellaceae	Haemophilus	?
MGS.277_13	Illeum	Bacteria	Proteobacteria	Gammaproteobacteria	Pasteurellaceae	Haemophilus	?
MGS.277_15	Illeum	Bacteria	Proteobacteria	Gammaproteobacteria	Pasteurellaceae	Haemophilus	?
MGS.277_16	Illeum	Bacteria	Proteobacteria	Gammaproteobacteria	Pasteurellaceae	Haemophilus	?
MGS.277_5	Illeum	Bacteria	Proteobacteria	Gammaproteobacteria	Pasteurellaceae	Haemophilus	?
MGS.277_6	Illeum	Bacteria	Proteobacteria	Gammaproteobacteria	Pasteurellaceae	Haemophilus	?
MGS.278_12	Illeum	Bacteria	Firmicutes	Bacilli	Streptococcaceae	Streptococcus	Streptococcus sanguinis_H
MGS.278_18	Illeum	Bacteria	Firmicutes	Bacilli	Streptococcaceae	Streptococcus	Streptococcus sanguinis_H
MGS.278_19	Illeum	Bacteria	Firmicutes	Bacilli	Streptococcaceae	Streptococcus	Streptococcus sanguinis_H
MGS.278_26	Illeum	Bacteria	Firmicutes	Bacilli	Streptococcaceae	Streptococcus	Streptococcus sanguinis_H
MGS.278_29	Illeum	Bacteria	Firmicutes	Bacilli	Streptococcaceae	Streptococcus	Streptococcus sanguinis_H
MGS.278_32	Illeum	Bacteria	Firmicutes	Bacilli	Streptococcaceae	Streptococcus	Streptococcus sanguinis_H
MGS.282_1	Illeum	Bacteria	Bacteroidota	Bacteroidia	Bacteroidaceae	Bacteroides	Bacteroides finegoldii
MGS.283_3	Illeum	Bacteria	Proteobacteria	Gammaproteobacteria	Pasteurellaceae	Aggregatibacter	Aggregatibacter aphrophilus
MGS.283_4	Illeum	Bacteria	Proteobacteria	Gammaproteobacteria	Pasteurellaceae	Aggregatibacter	Aggregatibacter aphrophilus
MGS.283_8	Illeum	Bacteria	Proteobacteria	Gammaproteobacteria	Pasteurellaceae	Aggregatibacter	Aggregatibacter aphrophilus
MGS.283_9	Illeum	Bacteria	Proteobacteria	Gammaproteobacteria	Pasteurellaceae	Aggregatibacter	Aggregatibacter aphrophilus
MGS.284_1	Illeum	Bacteria	Proteobacteria	Gammaproteobacteria	Neisseriaceae	Neisseria	Neisseria sp000186165
MGS.284_10	Illeum	Bacteria	Proteobacteria	Gammaproteobacteria	Neisseriaceae	Neisseria	Neisseria sp000186165
MGS.284_11	Illeum	Bacteria	Proteobacteria	Gammaproteobacteria	Neisseriaceae	Neisseria	Neisseria sp000186165
MGS.284_12	Illeum	Bacteria	Proteobacteria	Gammaproteobacteria	Neisseriaceae	Neisseria	Neisseria sp000186165
MGS.284_13	Illeum	Bacteria	Proteobacteria	Gammaproteobacteria	Neisseriaceae	Neisseria	Neisseria sp000186165
MGS.284_14	Illeum	Bacteria	Proteobacteria	Gammaproteobacteria	Neisseriaceae	Neisseria	Neisseria sp000186165
MGS.284_15	Illeum	Bacteria	Proteobacteria	Gammaproteobacteria	Neisseriaceae	Neisseria	Neisseria sp000186165
MGS.284_18	Illeum	Bacteria	Proteobacteria	Gammaproteobacteria	Neisseriaceae	Neisseria	Neisseria sp000186165
MGS.284_19	Illeum	Bacteria	Proteobacteria	Gammaproteobacteria	Neisseriaceae	Neisseria	Neisseria sp000186165
MGS.284_2	Illeum	Bacteria	Proteobacteria	Gammaproteobacteria	Neisseriaceae	Neisseria	Neisseria sp000186165
MGS.284_20	Illeum	Bacteria	Proteobacteria	Gammaproteobacteria	Neisseriaceae	Neisseria	Neisseria sp000186165
MGS.284_21	Illeum	Bacteria	Proteobacteria	Gammaproteobacteria	Neisseriaceae	Neisseria	Neisseria sp000186165
MGS.284_22	Illeum	Bacteria	Proteobacteria	Gammaproteobacteria	Neisseriaceae	Neisseria	Neisseria sp000186165
MGS.284_23	Illeum	Bacteria	Proteobacteria	Gammaproteobacteria	Neisseriaceae	Neisseria	Neisseria sp000186165
MGS.284_24	Illeum	Bacteria	Proteobacteria	Gammaproteobacteria	Neisseriaceae	Neisseria	Neisseria sp000186165
MGS.284_26	Illeum	Bacteria	Proteobacteria	Gammaproteobacteria	Neisseriaceae	Neisseria	Neisseria sp000186165
MGS.284_27	Illeum	Bacteria	Proteobacteria	Gammaproteobacteria	Neisseriaceae	Neisseria	Neisseria sp000186165
MGS.284_28	Illeum	Bacteria	Proteobacteria	Gammaproteobacteria	Neisseriaceae	Neisseria	Neisseria sp000186165
MGS.284_29	Illeum	Bacteria	Proteobacteria	Gammaproteobacteria	Neisseriaceae	Neisseria	Neisseria sp000186165
MGS.284_3	Illeum	Bacteria	Proteobacteria	Gammaproteobacteria	Neisseriaceae	Neisseria	Neisseria sp000186165
MGS.284_31	Illeum	Bacteria	Proteobacteria	Gammaproteobacteria	Neisseriaceae	Neisseria	Neisseria sp000186165
MGS.284_35	Illeum	Bacteria	Proteobacteria	Gammaproteobacteria	Neisseriaceae	Neisseria	Neisseria sp000186165
MGS.284_38	Illeum	Bacteria	Proteobacteria	Gammaproteobacteria	Neisseriaceae	Neisseria	Neisseria sp000186165
MGS.284_39	Illeum	Bacteria	Proteobacteria	Gammaproteobacteria	Neisseriaceae	Neisseria	Neisseria sp000186165
MGS.284_4	Illeum	Bacteria	Proteobacteria	Gammaproteobacteria	Neisseriaceae	Neisseria	Neisseria sp000186165
MGS.284_41	Illeum	Bacteria	Proteobacteria	Gammaproteobacteria	Neisseriaceae	Neisseria	Neisseria sp000186165
MGS.284_44	Illeum	Bacteria	Proteobacteria	Gammaproteobacteria	Neisseriaceae	Neisseria	Neisseria sp000186165
MGS.284_46	Illeum	Bacteria	Proteobacteria	Gammaproteobacteria	Neisseriaceae	Neisseria	Neisseria sp000186165
MGS.284_49	Illeum	Bacteria	Proteobacteria	Gammaproteobacteria	Neisseriaceae	Neisseria	Neisseria sp000186165
MGS.284_5	Illeum	Bacteria	Proteobacteria	Gammaproteobacteria	Neisseriaceae	Neisseria	Neisseria sp000186165
MGS.284_50	Illeum	Bacteria	Proteobacteria	Gammaproteobacteria	Neisseriaceae	Neisseria	Neisseria sp000186165
MGS.284_51	Illeum	Bacteria	Proteobacteria	Gammaproteobacteria	Neisseriaceae	Neisseria	Neisseria sp000186165
MGS.284_52	Illeum	Bacteria	Proteobacteria	Gammaproteobacteria	Neisseriaceae	Neisseria	Neisseria sp000186165
MGS.284_6	Illeum	Bacteria	Proteobacteria	Gammaproteobacteria	Neisseriaceae	Neisseria	Neisseria sp000186165
MGS.284_7	Illeum	Bacteria	Proteobacteria	Gammaproteobacteria	Neisseriaceae	Neisseria	Neisseria sp000186165
MGS.284_8	Illeum	Bacteria	Proteobacteria	Gammaproteobacteria	Neisseriaceae	Neisseria	Neisseria sp000186165
MGS.284_9	Illeum	Bacteria	Proteobacteria	Gammaproteobacteria	Neisseriaceae	Neisseria	Neisseria sp000186165
MGS.285_15	Illeum	Bacteria	Patescibacteria	Saccharimonadia	Nanogingivalaceae	Nanogingivalis	Nanogingivalis sp900555945
MGS.285_16	Illeum	Bacteria	Patescibacteria	Saccharimonadia	Nanogingivalaceae	Nanogingivalis	Nanogingivalis sp900555945
MGS.285_2	Illeum	Bacteria	Patescibacteria	Saccharimonadia	Nanogingivalaceae	Nanogingivalis	Nanogingivalis sp900555945
MGS.285_22	Illeum	Bacteria	Patescibacteria	Saccharimonadia	Nanogingivalaceae	Nanogingivalis	Nanogingivalis sp900555945
MGS.285_4	Illeum	Bacteria	Patescibacteria	Saccharimonadia	Nanogingivalaceae	Nanogingivalis	Nanogingivalis sp900555945
MGS.286_1	Illeum	Bacteria	Firmicutes	Bacilli	Aerococcaceae	Abiotrophia	Abiotrophia defectiva
MGS.286_13	Illeum	Bacteria	Firmicutes	Bacilli	Aerococcaceae	Abiotrophia	Abiotrophia defectiva
MGS.286_14	Illeum	Bacteria	Firmicutes	Bacilli	Aerococcaceae	Abiotrophia	Abiotrophia defectiva
MGS.286_2	Illeum	Bacteria	Firmicutes	Bacilli	Aerococcaceae	Abiotrophia	Abiotrophia defectiva
MGS.286_4	Illeum	Bacteria	Firmicutes	Bacilli	Aerococcaceae	Abiotrophia	Abiotrophia defectiva
MGS.286_5	Illeum	Bacteria	Firmicutes	Bacilli	Aerococcaceae	Abiotrophia	Abiotrophia defectiva
MGS.286_6	Illeum	Bacteria	Firmicutes	Bacilli	Aerococcaceae	Abiotrophia	Abiotrophia defectiva
MGS.286_7	Illeum	Bacteria	Firmicutes	Bacilli	Aerococcaceae	Abiotrophia	Abiotrophia defectiva
MGS.286_8	Illeum	Bacteria	Firmicutes	Bacilli	Aerococcaceae	Abiotrophia	Abiotrophia defectiva
MGS.287_2	Illeum	Bacteria	Patescibacteria	JAEDAM01	UBA2023	GN02-873	GN02-873 sp003260345
MGS.288_1	Illeum	Bacteria	Firmicutes_A	Clostridia	Lachnospiraceae	Lachnoanaerobaculum	Lachnoanaerobaculum sp000287675
MGS.288_14	Illeum	Bacteria	Firmicutes_A	Clostridia	Lachnospiraceae	Lachnoanaerobaculum	Lachnoanaerobaculum sp000287675
MGS.288_3	Illeum	Bacteria	Firmicutes_A	Clostridia	Lachnospiraceae	Lachnoanaerobaculum	Lachnoanaerobaculum sp000287675
MGS.288_4	Illeum	Bacteria	Firmicutes_A	Clostridia	Lachnospiraceae	Lachnoanaerobaculum	Lachnoanaerobaculum sp000287675
MGS.288_6	Illeum	Bacteria	Firmicutes_A	Clostridia	Lachnospiraceae	Lachnoanaerobaculum	Lachnoanaerobaculum sp000287675
MGS.288_7	Illeum	Bacteria	Firmicutes_A	Clostridia	Lachnospiraceae	Lachnoanaerobaculum	Lachnoanaerobaculum sp000287675
MGS.288_8	Illeum	Bacteria	Firmicutes_A	Clostridia	Lachnospiraceae	Lachnoanaerobaculum	Lachnoanaerobaculum sp000287675
MGS.288_9	Illeum	Bacteria	Firmicutes_A	Clostridia	Lachnospiraceae	Lachnoanaerobaculum	Lachnoanaerobaculum sp000287675
MGS.289_1	Illeum	Bacteria	Bacteroidota	Bacteroidia	Bacteroidaceae	Prevotella	Prevotella melaninogenica
MGS.289_10	Illeum	Bacteria	Bacteroidota	Bacteroidia	Bacteroidaceae	Prevotella	Prevotella melaninogenica
MGS.289_15	Illeum	Bacteria	Bacteroidota	Bacteroidia	Bacteroidaceae	Prevotella	Prevotella melaninogenica
MGS.289_4	Illeum	Bacteria	Bacteroidota	Bacteroidia	Bacteroidaceae	Prevotella	Prevotella melaninogenica
MGS.290_1	Illeum	Bacteria	Proteobacteria	Gammaproteobacteria	Pasteurellaceae	Haemophilus_A	Haemophilus_A paraphrohaemolyticus
MGS.290_2	Illeum	Bacteria	Proteobacteria	Gammaproteobacteria	Pasteurellaceae	Haemophilus_A	Haemophilus_A paraphrohaemolyticus
MGS.292_1	Illeum	Bacteria	Firmicutes_A	Clostridia	Ruminococcaceae	Faecalibacterium	Faecalibacterium prausnitzii_G
MGS.292_2	Illeum	Bacteria	Firmicutes_A	Clostridia	Ruminococcaceae	Faecalibacterium	Faecalibacterium prausnitzii_G
MGS.292_4	Illeum	Bacteria	Firmicutes_A	Clostridia	Ruminococcaceae	Faecalibacterium	Faecalibacterium prausnitzii_G
MGS.292_6	Illeum	Bacteria	Firmicutes_A	Clostridia	Ruminococcaceae	Faecalibacterium	Faecalibacterium prausnitzii_G
MGS.293_1	Illeum	Bacteria	Actinobacteriota	Actinomycetia	Actinomycetaceae	Actinomyces	Actinomyces sp900323545
MGS.293_10	Illeum	Bacteria	Actinobacteriota	Actinomycetia	Actinomycetaceae	Actinomyces	Actinomyces sp900323545
MGS.293_11	Illeum	Bacteria	Actinobacteriota	Actinomycetia	Actinomycetaceae	Actinomyces	Actinomyces sp900323545
MGS.293_12	Illeum	Bacteria	Actinobacteriota	Actinomycetia	Actinomycetaceae	Actinomyces	Actinomyces sp900323545
MGS.293_13	Illeum	Bacteria	Actinobacteriota	Actinomycetia	Actinomycetaceae	Actinomyces	Actinomyces sp900323545
MGS.293_14	Illeum	Bacteria	Actinobacteriota	Actinomycetia	Actinomycetaceae	Actinomyces	Actinomyces sp900323545
MGS.293_4	Illeum	Bacteria	Actinobacteriota	Actinomycetia	Actinomycetaceae	Actinomyces	Actinomyces sp900323545
MGS.293_5	Illeum	Bacteria	Actinobacteriota	Actinomycetia	Actinomycetaceae	Actinomyces	Actinomyces sp900323545
MGS.293_6	Illeum	Bacteria	Actinobacteriota	Actinomycetia	Actinomycetaceae	Actinomyces	Actinomyces sp900323545
MGS.293_7	Illeum	Bacteria	Actinobacteriota	Actinomycetia	Actinomycetaceae	Actinomyces	Actinomyces sp900323545
MGS.293_8	Illeum	Bacteria	Actinobacteriota	Actinomycetia	Actinomycetaceae	Actinomyces	Actinomyces sp900323545
MGS.293_9	Illeum	Bacteria	Actinobacteriota	Actinomycetia	Actinomycetaceae	Actinomyces	Actinomyces sp900323545
MGS.294_18	Illeum	Bacteria	Firmicutes	Bacilli	Streptococcaceae	Streptococcus	Streptococcus anginosus_C
MGS.294_2	Illeum	Bacteria	Firmicutes	Bacilli	Streptococcaceae	Streptococcus	Streptococcus anginosus_C
MGS.294_20	Illeum	Bacteria	Firmicutes	Bacilli	Streptococcaceae	Streptococcus	Streptococcus anginosus_C
MGS.294_21	Illeum	Bacteria	Firmicutes	Bacilli	Streptococcaceae	Streptococcus	Streptococcus anginosus_C
MGS.294_3	Illeum	Bacteria	Firmicutes	Bacilli	Streptococcaceae	Streptococcus	Streptococcus anginosus_C
MGS.294_5	Illeum	Bacteria	Firmicutes	Bacilli	Streptococcaceae	Streptococcus	Streptococcus anginosus_C
MGS.294_7	Illeum	Bacteria	Firmicutes	Bacilli	Streptococcaceae	Streptococcus	Streptococcus anginosus_C
MGS.295_26	Illeum	Bacteria	Firmicutes	Bacilli	Gemellaceae	Gemella	Gemella haemolysans_B
MGS.295_30	Illeum	Bacteria	Firmicutes	Bacilli	Gemellaceae	Gemella	Gemella haemolysans_B
MGS.295_31	Illeum	Bacteria	Firmicutes	Bacilli	Gemellaceae	Gemella	Gemella haemolysans_B
MGS.295_32	Illeum	Bacteria	Firmicutes	Bacilli	Gemellaceae	Gemella	Gemella haemolysans_B
MGS.295_37	Illeum	Bacteria	Firmicutes	Bacilli	Gemellaceae	Gemella	Gemella haemolysans_B
MGS.295_40	Illeum	Bacteria	Firmicutes	Bacilli	Gemellaceae	Gemella	Gemella haemolysans_B
MGS.295_6	Illeum	Bacteria	Firmicutes	Bacilli	Gemellaceae	Gemella	Gemella haemolysans_B
MGS.297_1	Illeum	Bacteria	Proteobacteria	Gammaproteobacteria	Enterobacteriaceae	Klebsiella	Klebsiella variicola
MGS.297_10	Illeum	Bacteria	Proteobacteria	Gammaproteobacteria	Enterobacteriaceae	Klebsiella	Klebsiella variicola
MGS.297_11	Illeum	Bacteria	Proteobacteria	Gammaproteobacteria	Enterobacteriaceae	Klebsiella	Klebsiella variicola
MGS.297_12	Illeum	Bacteria	Proteobacteria	Gammaproteobacteria	Enterobacteriaceae	Klebsiella	Klebsiella variicola
MGS.297_13	Illeum	Bacteria	Proteobacteria	Gammaproteobacteria	Enterobacteriaceae	Klebsiella	Klebsiella variicola
MGS.297_14	Illeum	Bacteria	Proteobacteria	Gammaproteobacteria	Enterobacteriaceae	Klebsiella	Klebsiella variicola
MGS.297_15	Illeum	Bacteria	Proteobacteria	Gammaproteobacteria	Enterobacteriaceae	Klebsiella	Klebsiella variicola
MGS.297_16	Illeum	Bacteria	Proteobacteria	Gammaproteobacteria	Enterobacteriaceae	Klebsiella	Klebsiella variicola
MGS.297_17	Illeum	Bacteria	Proteobacteria	Gammaproteobacteria	Enterobacteriaceae	Klebsiella	Klebsiella variicola
MGS.297_18	Illeum	Bacteria	Proteobacteria	Gammaproteobacteria	Enterobacteriaceae	Klebsiella	Klebsiella variicola
MGS.297_19	Illeum	Bacteria	Proteobacteria	Gammaproteobacteria	Enterobacteriaceae	Klebsiella	Klebsiella variicola
MGS.297_2	Illeum	Bacteria	Proteobacteria	Gammaproteobacteria	Enterobacteriaceae	Klebsiella	Klebsiella variicola
MGS.297_20	Illeum	Bacteria	Proteobacteria	Gammaproteobacteria	Enterobacteriaceae	Klebsiella	Klebsiella variicola
MGS.297_21	Illeum	Bacteria	Proteobacteria	Gammaproteobacteria	Enterobacteriaceae	Klebsiella	Klebsiella variicola
MGS.297_22	Illeum	Bacteria	Proteobacteria	Gammaproteobacteria	Enterobacteriaceae	Klebsiella	Klebsiella variicola
MGS.297_23	Illeum	Bacteria	Proteobacteria	Gammaproteobacteria	Enterobacteriaceae	Klebsiella	Klebsiella variicola
MGS.297_24	Illeum	Bacteria	Proteobacteria	Gammaproteobacteria	Enterobacteriaceae	Klebsiella	Klebsiella variicola
MGS.297_25	Illeum	Bacteria	Proteobacteria	Gammaproteobacteria	Enterobacteriaceae	Klebsiella	Klebsiella variicola
MGS.297_3	Illeum	Bacteria	Proteobacteria	Gammaproteobacteria	Enterobacteriaceae	Klebsiella	Klebsiella variicola
MGS.297_4	Illeum	Bacteria	Proteobacteria	Gammaproteobacteria	Enterobacteriaceae	Klebsiella	Klebsiella variicola
MGS.297_5	Illeum	Bacteria	Proteobacteria	Gammaproteobacteria	Enterobacteriaceae	Klebsiella	Klebsiella variicola
MGS.297_6	Illeum	Bacteria	Proteobacteria	Gammaproteobacteria	Enterobacteriaceae	Klebsiella	Klebsiella variicola
MGS.297_7	Illeum	Bacteria	Proteobacteria	Gammaproteobacteria	Enterobacteriaceae	Klebsiella	Klebsiella variicola
MGS.297_8	Illeum	Bacteria	Proteobacteria	Gammaproteobacteria	Enterobacteriaceae	Klebsiella	Klebsiella variicola
MGS.297_9	Illeum	Bacteria	Proteobacteria	Gammaproteobacteria	Enterobacteriaceae	Klebsiella	Klebsiella variicola
MGS.298_1	Illeum	Bacteria	Patescibacteria	Saccharimonadia	Saccharimonadaceae	Saccharimonas	Saccharimonas sp905365145
MGS.298_10	Illeum	Bacteria	Patescibacteria	Saccharimonadia	Saccharimonadaceae	Saccharimonas	Saccharimonas sp905365145
MGS.298_11	Illeum	Bacteria	Patescibacteria	Saccharimonadia	Saccharimonadaceae	Saccharimonas	Saccharimonas sp905365145
MGS.298_2	Illeum	Bacteria	Patescibacteria	Saccharimonadia	Saccharimonadaceae	Saccharimonas	Saccharimonas sp905365145
MGS.298_3	Illeum	Bacteria	Patescibacteria	Saccharimonadia	Saccharimonadaceae	Saccharimonas	Saccharimonas sp905365145
MGS.298_4	Illeum	Bacteria	Patescibacteria	Saccharimonadia	Saccharimonadaceae	Saccharimonas	Saccharimonas sp905365145
MGS.298_6	Illeum	Bacteria	Patescibacteria	Saccharimonadia	Saccharimonadaceae	Saccharimonas	Saccharimonas sp905365145
MGS.298_8	Illeum	Bacteria	Patescibacteria	Saccharimonadia	Saccharimonadaceae	Saccharimonas	Saccharimonas sp905365145
MGS.299_4	Illeum	Bacteria	Patescibacteria	JAEDAM01	X112	HOT-345	HOT-345 sp013333295
MGS.299_7	Illeum	Bacteria	Patescibacteria	JAEDAM01	X112	HOT-345	HOT-345 sp013333295
MGS.3_1	Illeum	Bacteria	Firmicutes	Bacilli	Turicibacteraceae	Turicibacter	Turicibacter sanguinis
MGS.3_2	Illeum	Bacteria	Firmicutes	Bacilli	Turicibacteraceae	Turicibacter	Turicibacter sanguinis
MGS.3_3	Illeum	Bacteria	Firmicutes	Bacilli	Turicibacteraceae	Turicibacter	Turicibacter sanguinis
MGS.3_6	Illeum	Bacteria	Firmicutes	Bacilli	Turicibacteraceae	Turicibacter	Turicibacter sanguinis
MGS.3_9	Illeum	Bacteria	Firmicutes	Bacilli	Turicibacteraceae	Turicibacter	Turicibacter sanguinis
MGS.300_1	Illeum	Bacteria	Proteobacteria	Gammaproteobacteria	Enterobacteriaceae	Escherichia	Escherichia marmotae
MGS.300_2	Illeum	Bacteria	Proteobacteria	Gammaproteobacteria	Enterobacteriaceae	Escherichia	Escherichia marmotae
MGS.300_3	Illeum	Bacteria	Proteobacteria	Gammaproteobacteria	Enterobacteriaceae	Escherichia	Escherichia marmotae
MGS.300_5	Illeum	Bacteria	Proteobacteria	Gammaproteobacteria	Enterobacteriaceae	Escherichia	Escherichia marmotae
MGS.300_6	Illeum	Bacteria	Proteobacteria	Gammaproteobacteria	Enterobacteriaceae	Escherichia	Escherichia marmotae
MGS.300_7	Illeum	Bacteria	Proteobacteria	Gammaproteobacteria	Enterobacteriaceae	Escherichia	Escherichia marmotae
MGS.31_11	Illeum	Bacteria	Firmicutes_A	Clostridia	Anaerovoracaceae	Mogibacterium	Mogibacterium diversum
MGS.31_13	Illeum	Bacteria	Firmicutes_A	Clostridia	Anaerovoracaceae	Mogibacterium	Mogibacterium diversum
MGS.31_3	Illeum	Bacteria	Firmicutes_A	Clostridia	Anaerovoracaceae	Mogibacterium	Mogibacterium diversum
MGS.31_8	Illeum	Bacteria	Firmicutes_A	Clostridia	Anaerovoracaceae	Mogibacterium	Mogibacterium diversum
MGS.34_1	Illeum	Bacteria	Proteobacteria	Gammaproteobacteria	Moraxellaceae	Acinetobacter	Acinetobacter baumannii
MGS.35_1	Illeum	Bacteria	Cyanobacteria	Vampirovibrionia	Gastranaerophilaceae	Zag111	Zag111 sp002102825
MGS.37_1	Illeum	Bacteria	Firmicutes_A	Clostridia	Anaerovoracaceae	Eubacterium_M	Eubacterium_M brachy
MGS.37_10	Illeum	Bacteria	Firmicutes_A	Clostridia	Anaerovoracaceae	Eubacterium_M	Eubacterium_M brachy
MGS.37_3	Illeum	Bacteria	Firmicutes_A	Clostridia	Anaerovoracaceae	Eubacterium_M	Eubacterium_M brachy
MGS.37_4	Illeum	Bacteria	Firmicutes_A	Clostridia	Anaerovoracaceae	Eubacterium_M	Eubacterium_M brachy
MGS.37_6	Illeum	Bacteria	Firmicutes_A	Clostridia	Anaerovoracaceae	Eubacterium_M	Eubacterium_M brachy
MGS.37_7	Illeum	Bacteria	Firmicutes_A	Clostridia	Anaerovoracaceae	Eubacterium_M	Eubacterium_M brachy
MGS.37_8	Illeum	Bacteria	Firmicutes_A	Clostridia	Anaerovoracaceae	Eubacterium_M	Eubacterium_M brachy
MGS.37_9	Illeum	Bacteria	Firmicutes_A	Clostridia	Anaerovoracaceae	Eubacterium_M	Eubacterium_M brachy
MGS.38_1	Illeum	Bacteria	Actinobacteriota	Actinomycetia	Bifidobacteriaceae	Bifidobacterium	Bifidobacterium animalis
MGS.38_10	Illeum	Bacteria	Actinobacteriota	Actinomycetia	Bifidobacteriaceae	Bifidobacterium	Bifidobacterium animalis
MGS.38_11	Illeum	Bacteria	Actinobacteriota	Actinomycetia	Bifidobacteriaceae	Bifidobacterium	Bifidobacterium animalis
MGS.38_12	Illeum	Bacteria	Actinobacteriota	Actinomycetia	Bifidobacteriaceae	Bifidobacterium	Bifidobacterium animalis
MGS.38_13	Illeum	Bacteria	Actinobacteriota	Actinomycetia	Bifidobacteriaceae	Bifidobacterium	Bifidobacterium animalis
MGS.38_14	Illeum	Bacteria	Actinobacteriota	Actinomycetia	Bifidobacteriaceae	Bifidobacterium	Bifidobacterium animalis
MGS.38_15	Illeum	Bacteria	Actinobacteriota	Actinomycetia	Bifidobacteriaceae	Bifidobacterium	Bifidobacterium animalis
MGS.38_16	Illeum	Bacteria	Actinobacteriota	Actinomycetia	Bifidobacteriaceae	Bifidobacterium	Bifidobacterium animalis
MGS.38_17	Illeum	Bacteria	Actinobacteriota	Actinomycetia	Bifidobacteriaceae	Bifidobacterium	Bifidobacterium animalis
MGS.38_18	Illeum	Bacteria	Actinobacteriota	Actinomycetia	Bifidobacteriaceae	Bifidobacterium	Bifidobacterium animalis
MGS.38_19	Illeum	Bacteria	Actinobacteriota	Actinomycetia	Bifidobacteriaceae	Bifidobacterium	Bifidobacterium animalis
MGS.38_2	Illeum	Bacteria	Actinobacteriota	Actinomycetia	Bifidobacteriaceae	Bifidobacterium	Bifidobacterium animalis
MGS.38_20	Illeum	Bacteria	Actinobacteriota	Actinomycetia	Bifidobacteriaceae	Bifidobacterium	Bifidobacterium animalis
MGS.38_21	Illeum	Bacteria	Actinobacteriota	Actinomycetia	Bifidobacteriaceae	Bifidobacterium	Bifidobacterium animalis
MGS.38_22	Illeum	Bacteria	Actinobacteriota	Actinomycetia	Bifidobacteriaceae	Bifidobacterium	Bifidobacterium animalis
MGS.38_23	Illeum	Bacteria	Actinobacteriota	Actinomycetia	Bifidobacteriaceae	Bifidobacterium	Bifidobacterium animalis
MGS.38_24	Illeum	Bacteria	Actinobacteriota	Actinomycetia	Bifidobacteriaceae	Bifidobacterium	Bifidobacterium animalis
MGS.38_25	Illeum	Bacteria	Actinobacteriota	Actinomycetia	Bifidobacteriaceae	Bifidobacterium	Bifidobacterium animalis
MGS.38_26	Illeum	Bacteria	Actinobacteriota	Actinomycetia	Bifidobacteriaceae	Bifidobacterium	Bifidobacterium animalis
MGS.38_27	Illeum	Bacteria	Actinobacteriota	Actinomycetia	Bifidobacteriaceae	Bifidobacterium	Bifidobacterium animalis
MGS.38_28	Illeum	Bacteria	Actinobacteriota	Actinomycetia	Bifidobacteriaceae	Bifidobacterium	Bifidobacterium animalis
MGS.38_29	Illeum	Bacteria	Actinobacteriota	Actinomycetia	Bifidobacteriaceae	Bifidobacterium	Bifidobacterium animalis
MGS.38_3	Illeum	Bacteria	Actinobacteriota	Actinomycetia	Bifidobacteriaceae	Bifidobacterium	Bifidobacterium animalis
MGS.38_30	Illeum	Bacteria	Actinobacteriota	Actinomycetia	Bifidobacteriaceae	Bifidobacterium	Bifidobacterium animalis
MGS.38_31	Illeum	Bacteria	Actinobacteriota	Actinomycetia	Bifidobacteriaceae	Bifidobacterium	Bifidobacterium animalis
MGS.38_32	Illeum	Bacteria	Actinobacteriota	Actinomycetia	Bifidobacteriaceae	Bifidobacterium	Bifidobacterium animalis
MGS.38_33	Illeum	Bacteria	Actinobacteriota	Actinomycetia	Bifidobacteriaceae	Bifidobacterium	Bifidobacterium animalis
MGS.38_34	Illeum	Bacteria	Actinobacteriota	Actinomycetia	Bifidobacteriaceae	Bifidobacterium	Bifidobacterium animalis
MGS.38_35	Illeum	Bacteria	Actinobacteriota	Actinomycetia	Bifidobacteriaceae	Bifidobacterium	Bifidobacterium animalis
MGS.38_36	Illeum	Bacteria	Actinobacteriota	Actinomycetia	Bifidobacteriaceae	Bifidobacterium	Bifidobacterium animalis
MGS.38_37	Illeum	Bacteria	Actinobacteriota	Actinomycetia	Bifidobacteriaceae	Bifidobacterium	Bifidobacterium animalis
MGS.38_38	Illeum	Bacteria	Actinobacteriota	Actinomycetia	Bifidobacteriaceae	Bifidobacterium	Bifidobacterium animalis
MGS.38_39	Illeum	Bacteria	Actinobacteriota	Actinomycetia	Bifidobacteriaceae	Bifidobacterium	Bifidobacterium animalis
MGS.38_4	Illeum	Bacteria	Actinobacteriota	Actinomycetia	Bifidobacteriaceae	Bifidobacterium	Bifidobacterium animalis
MGS.38_40	Illeum	Bacteria	Actinobacteriota	Actinomycetia	Bifidobacteriaceae	Bifidobacterium	Bifidobacterium animalis
MGS.38_41	Illeum	Bacteria	Actinobacteriota	Actinomycetia	Bifidobacteriaceae	Bifidobacterium	Bifidobacterium animalis
MGS.38_42	Illeum	Bacteria	Actinobacteriota	Actinomycetia	Bifidobacteriaceae	Bifidobacterium	Bifidobacterium animalis
MGS.38_43	Illeum	Bacteria	Actinobacteriota	Actinomycetia	Bifidobacteriaceae	Bifidobacterium	Bifidobacterium animalis
MGS.38_44	Illeum	Bacteria	Actinobacteriota	Actinomycetia	Bifidobacteriaceae	Bifidobacterium	Bifidobacterium animalis
MGS.38_45	Illeum	Bacteria	Actinobacteriota	Actinomycetia	Bifidobacteriaceae	Bifidobacterium	Bifidobacterium animalis
MGS.38_46	Illeum	Bacteria	Actinobacteriota	Actinomycetia	Bifidobacteriaceae	Bifidobacterium	Bifidobacterium animalis
MGS.38_47	Illeum	Bacteria	Actinobacteriota	Actinomycetia	Bifidobacteriaceae	Bifidobacterium	Bifidobacterium animalis
MGS.38_48	Illeum	Bacteria	Actinobacteriota	Actinomycetia	Bifidobacteriaceae	Bifidobacterium	Bifidobacterium animalis
MGS.38_49	Illeum	Bacteria	Actinobacteriota	Actinomycetia	Bifidobacteriaceae	Bifidobacterium	Bifidobacterium animalis
MGS.38_5	Illeum	Bacteria	Actinobacteriota	Actinomycetia	Bifidobacteriaceae	Bifidobacterium	Bifidobacterium animalis
MGS.38_50	Illeum	Bacteria	Actinobacteriota	Actinomycetia	Bifidobacteriaceae	Bifidobacterium	Bifidobacterium animalis
MGS.38_51	Illeum	Bacteria	Actinobacteriota	Actinomycetia	Bifidobacteriaceae	Bifidobacterium	Bifidobacterium animalis
MGS.38_52	Illeum	Bacteria	Actinobacteriota	Actinomycetia	Bifidobacteriaceae	Bifidobacterium	Bifidobacterium animalis
MGS.38_53	Illeum	Bacteria	Actinobacteriota	Actinomycetia	Bifidobacteriaceae	Bifidobacterium	Bifidobacterium animalis
MGS.38_54	Illeum	Bacteria	Actinobacteriota	Actinomycetia	Bifidobacteriaceae	Bifidobacterium	Bifidobacterium animalis
MGS.38_55	Illeum	Bacteria	Actinobacteriota	Actinomycetia	Bifidobacteriaceae	Bifidobacterium	Bifidobacterium animalis
MGS.38_56	Illeum	Bacteria	Actinobacteriota	Actinomycetia	Bifidobacteriaceae	Bifidobacterium	Bifidobacterium animalis
MGS.38_57	Illeum	Bacteria	Actinobacteriota	Actinomycetia	Bifidobacteriaceae	Bifidobacterium	Bifidobacterium animalis
MGS.38_58	Illeum	Bacteria	Actinobacteriota	Actinomycetia	Bifidobacteriaceae	Bifidobacterium	Bifidobacterium animalis
MGS.38_59	Illeum	Bacteria	Actinobacteriota	Actinomycetia	Bifidobacteriaceae	Bifidobacterium	Bifidobacterium animalis
MGS.38_6	Illeum	Bacteria	Actinobacteriota	Actinomycetia	Bifidobacteriaceae	Bifidobacterium	Bifidobacterium animalis
MGS.38_60	Illeum	Bacteria	Actinobacteriota	Actinomycetia	Bifidobacteriaceae	Bifidobacterium	Bifidobacterium animalis
MGS.38_61	Illeum	Bacteria	Actinobacteriota	Actinomycetia	Bifidobacteriaceae	Bifidobacterium	Bifidobacterium animalis
MGS.38_62	Illeum	Bacteria	Actinobacteriota	Actinomycetia	Bifidobacteriaceae	Bifidobacterium	Bifidobacterium animalis
MGS.38_63	Illeum	Bacteria	Actinobacteriota	Actinomycetia	Bifidobacteriaceae	Bifidobacterium	Bifidobacterium animalis
MGS.38_64	Illeum	Bacteria	Actinobacteriota	Actinomycetia	Bifidobacteriaceae	Bifidobacterium	Bifidobacterium animalis
MGS.38_65	Illeum	Bacteria	Actinobacteriota	Actinomycetia	Bifidobacteriaceae	Bifidobacterium	Bifidobacterium animalis
MGS.38_66	Illeum	Bacteria	Actinobacteriota	Actinomycetia	Bifidobacteriaceae	Bifidobacterium	Bifidobacterium animalis
MGS.38_67	Illeum	Bacteria	Actinobacteriota	Actinomycetia	Bifidobacteriaceae	Bifidobacterium	Bifidobacterium animalis
MGS.38_68	Illeum	Bacteria	Actinobacteriota	Actinomycetia	Bifidobacteriaceae	Bifidobacterium	Bifidobacterium animalis
MGS.38_69	Illeum	Bacteria	Actinobacteriota	Actinomycetia	Bifidobacteriaceae	Bifidobacterium	Bifidobacterium animalis
MGS.38_7	Illeum	Bacteria	Actinobacteriota	Actinomycetia	Bifidobacteriaceae	Bifidobacterium	Bifidobacterium animalis
MGS.38_70	Illeum	Bacteria	Actinobacteriota	Actinomycetia	Bifidobacteriaceae	Bifidobacterium	Bifidobacterium animalis
MGS.38_71	Illeum	Bacteria	Actinobacteriota	Actinomycetia	Bifidobacteriaceae	Bifidobacterium	Bifidobacterium animalis
MGS.38_72	Illeum	Bacteria	Actinobacteriota	Actinomycetia	Bifidobacteriaceae	Bifidobacterium	Bifidobacterium animalis
MGS.38_73	Illeum	Bacteria	Actinobacteriota	Actinomycetia	Bifidobacteriaceae	Bifidobacterium	Bifidobacterium animalis
MGS.38_74	Illeum	Bacteria	Actinobacteriota	Actinomycetia	Bifidobacteriaceae	Bifidobacterium	Bifidobacterium animalis
MGS.38_75	Illeum	Bacteria	Actinobacteriota	Actinomycetia	Bifidobacteriaceae	Bifidobacterium	Bifidobacterium animalis
MGS.38_76	Illeum	Bacteria	Actinobacteriota	Actinomycetia	Bifidobacteriaceae	Bifidobacterium	Bifidobacterium animalis
MGS.38_8	Illeum	Bacteria	Actinobacteriota	Actinomycetia	Bifidobacteriaceae	Bifidobacterium	Bifidobacterium animalis
MGS.38_9	Illeum	Bacteria	Actinobacteriota	Actinomycetia	Bifidobacteriaceae	Bifidobacterium	Bifidobacterium animalis
MGS.39_1	Illeum	Bacteria	Bacteroidota	Bacteroidia	Barnesiellaceae	Barnesiella	Barnesiella intestinihominis
MGS.4_2	Illeum	Bacteria	Fusobacteriota	Fusobacteriia	Leptotrichiaceae	Leptotrichia_A	Leptotrichia_A sp000469505
MGS.42_1	Illeum	Bacteria	Firmicutes_A	Clostridia	Peptoniphilaceae	Peptoniphilus_A	Peptoniphilus_A lacrimalis
MGS.42_2	Illeum	Bacteria	Firmicutes_A	Clostridia	Peptoniphilaceae	Peptoniphilus_A	Peptoniphilus_A lacrimalis
MGS.44_1	Illeum	Bacteria	Bacteroidota	Bacteroidia	Tannerellaceae	Parabacteroides	Parabacteroides merdae
MGS.44_3	Illeum	Bacteria	Bacteroidota	Bacteroidia	Tannerellaceae	Parabacteroides	Parabacteroides merdae
MGS.44_4	Illeum	Bacteria	Bacteroidota	Bacteroidia	Tannerellaceae	Parabacteroides	Parabacteroides merdae
MGS.44_5	Illeum	Bacteria	Bacteroidota	Bacteroidia	Tannerellaceae	Parabacteroides	Parabacteroides merdae
MGS.44_6	Illeum	Bacteria	Bacteroidota	Bacteroidia	Tannerellaceae	Parabacteroides	Parabacteroides merdae
MGS.44_8	Illeum	Bacteria	Bacteroidota	Bacteroidia	Tannerellaceae	Parabacteroides	Parabacteroides merdae
MGS.44_9	Illeum	Bacteria	Bacteroidota	Bacteroidia	Tannerellaceae	Parabacteroides	Parabacteroides merdae
MGS.46_1	Illeum	Bacteria	Firmicutes_A	Clostridia	Lachnospiraceae	CAG-303	CAG-303 sp000437755
MGS.47_2	Illeum	Bacteria	Actinobacteriota	Actinomycetia	Actinomycetaceae	Peptidiphaga	Peptidiphaga sp000466165
MGS.47_20	Illeum	Bacteria	Actinobacteriota	Actinomycetia	Actinomycetaceae	Peptidiphaga	Peptidiphaga sp000466165
MGS.47_22	Illeum	Bacteria	Actinobacteriota	Actinomycetia	Actinomycetaceae	Peptidiphaga	Peptidiphaga sp000466165
MGS.47_23	Illeum	Bacteria	Actinobacteriota	Actinomycetia	Actinomycetaceae	Peptidiphaga	Peptidiphaga sp000466165
MGS.47_24	Illeum	Bacteria	Actinobacteriota	Actinomycetia	Actinomycetaceae	Peptidiphaga	Peptidiphaga sp000466165
MGS.47_27	Illeum	Bacteria	Actinobacteriota	Actinomycetia	Actinomycetaceae	Peptidiphaga	Peptidiphaga sp000466165
MGS.47_28	Illeum	Bacteria	Actinobacteriota	Actinomycetia	Actinomycetaceae	Peptidiphaga	Peptidiphaga sp000466165
MGS.47_4	Illeum	Bacteria	Actinobacteriota	Actinomycetia	Actinomycetaceae	Peptidiphaga	Peptidiphaga sp000466165
MGS.47_5	Illeum	Bacteria	Actinobacteriota	Actinomycetia	Actinomycetaceae	Peptidiphaga	Peptidiphaga sp000466165
MGS.47_8	Illeum	Bacteria	Actinobacteriota	Actinomycetia	Actinomycetaceae	Peptidiphaga	Peptidiphaga sp000466165
MGS.48_1	Illeum	Bacteria	Bacteroidota	Bacteroidia	Rikenellaceae	Alistipes	Alistipes putredinis
MGS.48_10	Illeum	Bacteria	Bacteroidota	Bacteroidia	Rikenellaceae	Alistipes	Alistipes putredinis
MGS.48_11	Illeum	Bacteria	Bacteroidota	Bacteroidia	Rikenellaceae	Alistipes	Alistipes putredinis
MGS.48_2	Illeum	Bacteria	Bacteroidota	Bacteroidia	Rikenellaceae	Alistipes	Alistipes putredinis
MGS.48_3	Illeum	Bacteria	Bacteroidota	Bacteroidia	Rikenellaceae	Alistipes	Alistipes putredinis
MGS.48_5	Illeum	Bacteria	Bacteroidota	Bacteroidia	Rikenellaceae	Alistipes	Alistipes putredinis
MGS.48_6	Illeum	Bacteria	Bacteroidota	Bacteroidia	Rikenellaceae	Alistipes	Alistipes putredinis
MGS.48_7	Illeum	Bacteria	Bacteroidota	Bacteroidia	Rikenellaceae	Alistipes	Alistipes putredinis
MGS.48_8	Illeum	Bacteria	Bacteroidota	Bacteroidia	Rikenellaceae	Alistipes	Alistipes putredinis
MGS.48_9	Illeum	Bacteria	Bacteroidota	Bacteroidia	Rikenellaceae	Alistipes	Alistipes putredinis
MGS.5_1	Illeum	Bacteria	Firmicutes	Bacilli	Enterococcaceae	Enterococcus	Enterococcus faecalis
MGS.5_2	Illeum	Bacteria	Firmicutes	Bacilli	Enterococcaceae	Enterococcus	Enterococcus faecalis
MGS.50_10	Illeum	Bacteria	Firmicutes_A	Clostridia	Anaerovoracaceae	Eubacterium_B	Eubacterium_B sulci
MGS.50_11	Illeum	Bacteria	Firmicutes_A	Clostridia	Anaerovoracaceae	Eubacterium_B	Eubacterium_B sulci
MGS.50_12	Illeum	Bacteria	Firmicutes_A	Clostridia	Anaerovoracaceae	Eubacterium_B	Eubacterium_B sulci
MGS.50_14	Illeum	Bacteria	Firmicutes_A	Clostridia	Anaerovoracaceae	Eubacterium_B	Eubacterium_B sulci
MGS.50_15	Illeum	Bacteria	Firmicutes_A	Clostridia	Anaerovoracaceae	Eubacterium_B	Eubacterium_B sulci
MGS.50_16	Illeum	Bacteria	Firmicutes_A	Clostridia	Anaerovoracaceae	Eubacterium_B	Eubacterium_B sulci
MGS.50_18	Illeum	Bacteria	Firmicutes_A	Clostridia	Anaerovoracaceae	Eubacterium_B	Eubacterium_B sulci
MGS.50_19	Illeum	Bacteria	Firmicutes_A	Clostridia	Anaerovoracaceae	Eubacterium_B	Eubacterium_B sulci
MGS.50_20	Illeum	Bacteria	Firmicutes_A	Clostridia	Anaerovoracaceae	Eubacterium_B	Eubacterium_B sulci
MGS.50_21	Illeum	Bacteria	Firmicutes_A	Clostridia	Anaerovoracaceae	Eubacterium_B	Eubacterium_B sulci
MGS.50_22	Illeum	Bacteria	Firmicutes_A	Clostridia	Anaerovoracaceae	Eubacterium_B	Eubacterium_B sulci
MGS.50_23	Illeum	Bacteria	Firmicutes_A	Clostridia	Anaerovoracaceae	Eubacterium_B	Eubacterium_B sulci
MGS.50_24	Illeum	Bacteria	Firmicutes_A	Clostridia	Anaerovoracaceae	Eubacterium_B	Eubacterium_B sulci
MGS.50_25	Illeum	Bacteria	Firmicutes_A	Clostridia	Anaerovoracaceae	Eubacterium_B	Eubacterium_B sulci
MGS.50_26	Illeum	Bacteria	Firmicutes_A	Clostridia	Anaerovoracaceae	Eubacterium_B	Eubacterium_B sulci
MGS.50_27	Illeum	Bacteria	Firmicutes_A	Clostridia	Anaerovoracaceae	Eubacterium_B	Eubacterium_B sulci
MGS.50_28	Illeum	Bacteria	Firmicutes_A	Clostridia	Anaerovoracaceae	Eubacterium_B	Eubacterium_B sulci
MGS.50_29	Illeum	Bacteria	Firmicutes_A	Clostridia	Anaerovoracaceae	Eubacterium_B	Eubacterium_B sulci
MGS.50_30	Illeum	Bacteria	Firmicutes_A	Clostridia	Anaerovoracaceae	Eubacterium_B	Eubacterium_B sulci
MGS.50_31	Illeum	Bacteria	Firmicutes_A	Clostridia	Anaerovoracaceae	Eubacterium_B	Eubacterium_B sulci
MGS.50_32	Illeum	Bacteria	Firmicutes_A	Clostridia	Anaerovoracaceae	Eubacterium_B	Eubacterium_B sulci
MGS.50_35	Illeum	Bacteria	Firmicutes_A	Clostridia	Anaerovoracaceae	Eubacterium_B	Eubacterium_B sulci
MGS.50_55	Illeum	Bacteria	Firmicutes_A	Clostridia	Anaerovoracaceae	Eubacterium_B	Eubacterium_B sulci
MGS.50_56	Illeum	Bacteria	Firmicutes_A	Clostridia	Anaerovoracaceae	Eubacterium_B	Eubacterium_B sulci
MGS.50_7	Illeum	Bacteria	Firmicutes_A	Clostridia	Anaerovoracaceae	Eubacterium_B	Eubacterium_B sulci
MGS.50_8	Illeum	Bacteria	Firmicutes_A	Clostridia	Anaerovoracaceae	Eubacterium_B	Eubacterium_B sulci
MGS.50_9	Illeum	Bacteria	Firmicutes_A	Clostridia	Anaerovoracaceae	Eubacterium_B	Eubacterium_B sulci
MGS.51_1	Illeum	Bacteria	Firmicutes	Bacilli	Erysipelotrichaceae	Bulleidia	Bulleidia extructa
MGS.51_10	Illeum	Bacteria	Firmicutes	Bacilli	Erysipelotrichaceae	Bulleidia	Bulleidia extructa
MGS.51_11	Illeum	Bacteria	Firmicutes	Bacilli	Erysipelotrichaceae	Bulleidia	Bulleidia extructa
MGS.51_12	Illeum	Bacteria	Firmicutes	Bacilli	Erysipelotrichaceae	Bulleidia	Bulleidia extructa
MGS.51_13	Illeum	Bacteria	Firmicutes	Bacilli	Erysipelotrichaceae	Bulleidia	Bulleidia extructa
MGS.51_14	Illeum	Bacteria	Firmicutes	Bacilli	Erysipelotrichaceae	Bulleidia	Bulleidia extructa
MGS.51_15	Illeum	Bacteria	Firmicutes	Bacilli	Erysipelotrichaceae	Bulleidia	Bulleidia extructa
MGS.51_16	Illeum	Bacteria	Firmicutes	Bacilli	Erysipelotrichaceae	Bulleidia	Bulleidia extructa
MGS.51_17	Illeum	Bacteria	Firmicutes	Bacilli	Erysipelotrichaceae	Bulleidia	Bulleidia extructa
MGS.51_18	Illeum	Bacteria	Firmicutes	Bacilli	Erysipelotrichaceae	Bulleidia	Bulleidia extructa
MGS.51_19	Illeum	Bacteria	Firmicutes	Bacilli	Erysipelotrichaceae	Bulleidia	Bulleidia extructa
MGS.51_2	Illeum	Bacteria	Firmicutes	Bacilli	Erysipelotrichaceae	Bulleidia	Bulleidia extructa
MGS.51_20	Illeum	Bacteria	Firmicutes	Bacilli	Erysipelotrichaceae	Bulleidia	Bulleidia extructa
MGS.51_21	Illeum	Bacteria	Firmicutes	Bacilli	Erysipelotrichaceae	Bulleidia	Bulleidia extructa
MGS.51_22	Illeum	Bacteria	Firmicutes	Bacilli	Erysipelotrichaceae	Bulleidia	Bulleidia extructa
MGS.51_23	Illeum	Bacteria	Firmicutes	Bacilli	Erysipelotrichaceae	Bulleidia	Bulleidia extructa
MGS.51_3	Illeum	Bacteria	Firmicutes	Bacilli	Erysipelotrichaceae	Bulleidia	Bulleidia extructa
MGS.51_4	Illeum	Bacteria	Firmicutes	Bacilli	Erysipelotrichaceae	Bulleidia	Bulleidia extructa
MGS.51_5	Illeum	Bacteria	Firmicutes	Bacilli	Erysipelotrichaceae	Bulleidia	Bulleidia extructa
MGS.51_6	Illeum	Bacteria	Firmicutes	Bacilli	Erysipelotrichaceae	Bulleidia	Bulleidia extructa
MGS.51_7	Illeum	Bacteria	Firmicutes	Bacilli	Erysipelotrichaceae	Bulleidia	Bulleidia extructa
MGS.51_8	Illeum	Bacteria	Firmicutes	Bacilli	Erysipelotrichaceae	Bulleidia	Bulleidia extructa
MGS.51_9	Illeum	Bacteria	Firmicutes	Bacilli	Erysipelotrichaceae	Bulleidia	Bulleidia extructa
MGS.52_1	Illeum	Bacteria	Firmicutes_A	Clostridia	Peptostreptococcaceae	Peptostreptococcus	Peptostreptococcus sp900759325
MGS.52_10	Illeum	Bacteria	Firmicutes_A	Clostridia	Peptostreptococcaceae	Peptostreptococcus	Peptostreptococcus sp900759325
MGS.52_11	Illeum	Bacteria	Firmicutes_A	Clostridia	Peptostreptococcaceae	Peptostreptococcus	Peptostreptococcus sp900759325
MGS.52_12	Illeum	Bacteria	Firmicutes_A	Clostridia	Peptostreptococcaceae	Peptostreptococcus	Peptostreptococcus sp900759325
MGS.52_13	Illeum	Bacteria	Firmicutes_A	Clostridia	Peptostreptococcaceae	Peptostreptococcus	Peptostreptococcus sp900759325
MGS.52_14	Illeum	Bacteria	Firmicutes_A	Clostridia	Peptostreptococcaceae	Peptostreptococcus	Peptostreptococcus sp900759325
MGS.52_15	Illeum	Bacteria	Firmicutes_A	Clostridia	Peptostreptococcaceae	Peptostreptococcus	Peptostreptococcus sp900759325
MGS.52_18	Illeum	Bacteria	Firmicutes_A	Clostridia	Peptostreptococcaceae	Peptostreptococcus	Peptostreptococcus sp900759325
MGS.52_19	Illeum	Bacteria	Firmicutes_A	Clostridia	Peptostreptococcaceae	Peptostreptococcus	Peptostreptococcus sp900759325
MGS.52_2	Illeum	Bacteria	Firmicutes_A	Clostridia	Peptostreptococcaceae	Peptostreptococcus	Peptostreptococcus sp900759325
MGS.52_20	Illeum	Bacteria	Firmicutes_A	Clostridia	Peptostreptococcaceae	Peptostreptococcus	Peptostreptococcus sp900759325
MGS.52_21	Illeum	Bacteria	Firmicutes_A	Clostridia	Peptostreptococcaceae	Peptostreptococcus	Peptostreptococcus sp900759325
MGS.52_22	Illeum	Bacteria	Firmicutes_A	Clostridia	Peptostreptococcaceae	Peptostreptococcus	Peptostreptococcus sp900759325
MGS.52_23	Illeum	Bacteria	Firmicutes_A	Clostridia	Peptostreptococcaceae	Peptostreptococcus	Peptostreptococcus sp900759325
MGS.52_24	Illeum	Bacteria	Firmicutes_A	Clostridia	Peptostreptococcaceae	Peptostreptococcus	Peptostreptococcus sp900759325
MGS.52_25	Illeum	Bacteria	Firmicutes_A	Clostridia	Peptostreptococcaceae	Peptostreptococcus	Peptostreptococcus sp900759325
MGS.52_26	Illeum	Bacteria	Firmicutes_A	Clostridia	Peptostreptococcaceae	Peptostreptococcus	Peptostreptococcus sp900759325
MGS.52_27	Illeum	Bacteria	Firmicutes_A	Clostridia	Peptostreptococcaceae	Peptostreptococcus	Peptostreptococcus sp900759325
MGS.52_28	Illeum	Bacteria	Firmicutes_A	Clostridia	Peptostreptococcaceae	Peptostreptococcus	Peptostreptococcus sp900759325
MGS.52_29	Illeum	Bacteria	Firmicutes_A	Clostridia	Peptostreptococcaceae	Peptostreptococcus	Peptostreptococcus sp900759325
MGS.52_30	Illeum	Bacteria	Firmicutes_A	Clostridia	Peptostreptococcaceae	Peptostreptococcus	Peptostreptococcus sp900759325
MGS.52_34	Illeum	Bacteria	Firmicutes_A	Clostridia	Peptostreptococcaceae	Peptostreptococcus	Peptostreptococcus sp900759325
MGS.52_35	Illeum	Bacteria	Firmicutes_A	Clostridia	Peptostreptococcaceae	Peptostreptococcus	Peptostreptococcus sp900759325
MGS.52_36	Illeum	Bacteria	Firmicutes_A	Clostridia	Peptostreptococcaceae	Peptostreptococcus	Peptostreptococcus sp900759325
MGS.52_37	Illeum	Bacteria	Firmicutes_A	Clostridia	Peptostreptococcaceae	Peptostreptococcus	Peptostreptococcus sp900759325
MGS.52_38	Illeum	Bacteria	Firmicutes_A	Clostridia	Peptostreptococcaceae	Peptostreptococcus	Peptostreptococcus sp900759325
MGS.52_39	Illeum	Bacteria	Firmicutes_A	Clostridia	Peptostreptococcaceae	Peptostreptococcus	Peptostreptococcus sp900759325
MGS.52_4	Illeum	Bacteria	Firmicutes_A	Clostridia	Peptostreptococcaceae	Peptostreptococcus	Peptostreptococcus sp900759325
MGS.52_40	Illeum	Bacteria	Firmicutes_A	Clostridia	Peptostreptococcaceae	Peptostreptococcus	Peptostreptococcus sp900759325
MGS.52_41	Illeum	Bacteria	Firmicutes_A	Clostridia	Peptostreptococcaceae	Peptostreptococcus	Peptostreptococcus sp900759325
MGS.52_42	Illeum	Bacteria	Firmicutes_A	Clostridia	Peptostreptococcaceae	Peptostreptococcus	Peptostreptococcus sp900759325
MGS.52_43	Illeum	Bacteria	Firmicutes_A	Clostridia	Peptostreptococcaceae	Peptostreptococcus	Peptostreptococcus sp900759325
MGS.52_44	Illeum	Bacteria	Firmicutes_A	Clostridia	Peptostreptococcaceae	Peptostreptococcus	Peptostreptococcus sp900759325
MGS.52_45	Illeum	Bacteria	Firmicutes_A	Clostridia	Peptostreptococcaceae	Peptostreptococcus	Peptostreptococcus sp900759325
MGS.52_8	Illeum	Bacteria	Firmicutes_A	Clostridia	Peptostreptococcaceae	Peptostreptococcus	Peptostreptococcus sp900759325
MGS.52_9	Illeum	Bacteria	Firmicutes_A	Clostridia	Peptostreptococcaceae	Peptostreptococcus	Peptostreptococcus sp900759325
MGS.53_1	Illeum	Bacteria	Firmicutes_A	Clostridia	Lachnospiraceae	Fusicatenibacter	Fusicatenibacter saccharivorans
MGS.53_11	Illeum	Bacteria	Firmicutes_A	Clostridia	Lachnospiraceae	Fusicatenibacter	Fusicatenibacter saccharivorans
MGS.53_3	Illeum	Bacteria	Firmicutes_A	Clostridia	Lachnospiraceae	Fusicatenibacter	Fusicatenibacter saccharivorans
MGS.53_4	Illeum	Bacteria	Firmicutes_A	Clostridia	Lachnospiraceae	Fusicatenibacter	Fusicatenibacter saccharivorans
MGS.53_5	Illeum	Bacteria	Firmicutes_A	Clostridia	Lachnospiraceae	Fusicatenibacter	Fusicatenibacter saccharivorans
MGS.53_6	Illeum	Bacteria	Firmicutes_A	Clostridia	Lachnospiraceae	Fusicatenibacter	Fusicatenibacter saccharivorans
MGS.53_8	Illeum	Bacteria	Firmicutes_A	Clostridia	Lachnospiraceae	Fusicatenibacter	Fusicatenibacter saccharivorans
MGS.53_9	Illeum	Bacteria	Firmicutes_A	Clostridia	Lachnospiraceae	Fusicatenibacter	Fusicatenibacter saccharivorans
MGS.56_2	Illeum	Bacteria	Firmicutes_A	Clostridia	Lachnospiraceae	Lachnospira	Lachnospira rogosae_A
MGS.56_3	Illeum	Bacteria	Firmicutes_A	Clostridia	Lachnospiraceae	Lachnospira	Lachnospira rogosae_A
MGS.56_4	Illeum	Bacteria	Firmicutes_A	Clostridia	Lachnospiraceae	Lachnospira	Lachnospira rogosae_A
MGS.56_5	Illeum	Bacteria	Firmicutes_A	Clostridia	Lachnospiraceae	Lachnospira	Lachnospira rogosae_A
MGS.56_6	Illeum	Bacteria	Firmicutes_A	Clostridia	Lachnospiraceae	Lachnospira	Lachnospira rogosae_A
MGS.56_7	Illeum	Bacteria	Firmicutes_A	Clostridia	Lachnospiraceae	Lachnospira	Lachnospira rogosae_A
MGS.57_1	Illeum	Bacteria	Firmicutes	Bacilli	Lactobacillaceae	Lactobacillus	Lactobacillus helveticus
MGS.57_10	Illeum	Bacteria	Firmicutes	Bacilli	Lactobacillaceae	Lactobacillus	Lactobacillus helveticus
MGS.57_11	Illeum	Bacteria	Firmicutes	Bacilli	Lactobacillaceae	Lactobacillus	Lactobacillus helveticus
MGS.57_13	Illeum	Bacteria	Firmicutes	Bacilli	Lactobacillaceae	Lactobacillus	Lactobacillus helveticus
MGS.57_2	Illeum	Bacteria	Firmicutes	Bacilli	Lactobacillaceae	Lactobacillus	Lactobacillus helveticus
MGS.57_3	Illeum	Bacteria	Firmicutes	Bacilli	Lactobacillaceae	Lactobacillus	Lactobacillus helveticus
MGS.57_4	Illeum	Bacteria	Firmicutes	Bacilli	Lactobacillaceae	Lactobacillus	Lactobacillus helveticus
MGS.57_5	Illeum	Bacteria	Firmicutes	Bacilli	Lactobacillaceae	Lactobacillus	Lactobacillus helveticus
MGS.57_6	Illeum	Bacteria	Firmicutes	Bacilli	Lactobacillaceae	Lactobacillus	Lactobacillus helveticus
MGS.57_7	Illeum	Bacteria	Firmicutes	Bacilli	Lactobacillaceae	Lactobacillus	Lactobacillus helveticus
MGS.57_8	Illeum	Bacteria	Firmicutes	Bacilli	Lactobacillaceae	Lactobacillus	Lactobacillus helveticus
MGS.57_9	Illeum	Bacteria	Firmicutes	Bacilli	Lactobacillaceae	Lactobacillus	Lactobacillus helveticus
MGS.58_1	Illeum	Bacteria	Actinobacteriota	Actinomycetia	Bifidobacteriaceae	Bifidobacterium	Bifidobacterium pseudocatenulatum
MGS.58_2	Illeum	Bacteria	Actinobacteriota	Actinomycetia	Bifidobacteriaceae	Bifidobacterium	Bifidobacterium pseudocatenulatum
MGS.58_3	Illeum	Bacteria	Actinobacteriota	Actinomycetia	Bifidobacteriaceae	Bifidobacterium	Bifidobacterium pseudocatenulatum
MGS.58_4	Illeum	Bacteria	Actinobacteriota	Actinomycetia	Bifidobacteriaceae	Bifidobacterium	Bifidobacterium pseudocatenulatum
MGS.58_6	Illeum	Bacteria	Actinobacteriota	Actinomycetia	Bifidobacteriaceae	Bifidobacterium	Bifidobacterium pseudocatenulatum
MGS.58_7	Illeum	Bacteria	Actinobacteriota	Actinomycetia	Bifidobacteriaceae	Bifidobacterium	Bifidobacterium pseudocatenulatum
MGS.59_1	Illeum	Bacteria	Bacteroidota	Bacteroidia	Rikenellaceae	Alistipes	Alistipes shahii
MGS.6_1	Illeum	Bacteria	Firmicutes_C	Negativicutes	Dialisteraceae	Dialister	Dialister hominis
MGS.6_2	Illeum	Bacteria	Firmicutes_C	Negativicutes	Dialisteraceae	Dialister	Dialister hominis
MGS.6_4	Illeum	Bacteria	Firmicutes_C	Negativicutes	Dialisteraceae	Dialister	Dialister hominis
MGS.60_1	Illeum	Bacteria	Firmicutes_A	Clostridia	Lachnospiraceae	Stomatobaculum	Stomatobaculum longum
MGS.60_2	Illeum	Bacteria	Firmicutes_A	Clostridia	Lachnospiraceae	Stomatobaculum	Stomatobaculum longum
MGS.60_4	Illeum	Bacteria	Firmicutes_A	Clostridia	Lachnospiraceae	Stomatobaculum	Stomatobaculum longum
MGS.60_6	Illeum	Bacteria	Firmicutes_A	Clostridia	Lachnospiraceae	Stomatobaculum	Stomatobaculum longum
MGS.60_8	Illeum	Bacteria	Firmicutes_A	Clostridia	Lachnospiraceae	Stomatobaculum	Stomatobaculum longum
MGS.61_1	Illeum	Bacteria	Firmicutes	Bacilli	Lactobacillaceae	Lactobacillus	Lactobacillus paragasseri
MGS.61_2	Illeum	Bacteria	Firmicutes	Bacilli	Lactobacillaceae	Lactobacillus	Lactobacillus paragasseri
MGS.62_1	Illeum	Bacteria	Actinobacteriota	Coriobacteriia	Coriobacteriaceae	Collinsella	Collinsella intestinalis
MGS.63_10	Illeum	Bacteria	Firmicutes_A	Clostridia	Clostridiaceae	Clostridium	Clostridium sp900540255
MGS.63_11	Illeum	Bacteria	Firmicutes_A	Clostridia	Clostridiaceae	Clostridium	Clostridium sp900540255
MGS.63_12	Illeum	Bacteria	Firmicutes_A	Clostridia	Clostridiaceae	Clostridium	Clostridium sp900540255
MGS.63_3	Illeum	Bacteria	Firmicutes_A	Clostridia	Clostridiaceae	Clostridium	Clostridium sp900540255
MGS.63_5	Illeum	Bacteria	Firmicutes_A	Clostridia	Clostridiaceae	Clostridium	Clostridium sp900540255
MGS.63_6	Illeum	Bacteria	Firmicutes_A	Clostridia	Clostridiaceae	Clostridium	Clostridium sp900540255
MGS.63_8	Illeum	Bacteria	Firmicutes_A	Clostridia	Clostridiaceae	Clostridium	Clostridium sp900540255
MGS.63_9	Illeum	Bacteria	Firmicutes_A	Clostridia	Clostridiaceae	Clostridium	Clostridium sp900540255
MGS.64_1	Illeum	Bacteria	Actinobacteriota	Coriobacteriia	Eggerthellaceae	CAG-1427	CAG-1427 sp000436075
MGS.64_2	Illeum	Bacteria	Actinobacteriota	Coriobacteriia	Eggerthellaceae	CAG-1427	CAG-1427 sp000436075
MGS.64_3	Illeum	Bacteria	Actinobacteriota	Coriobacteriia	Eggerthellaceae	CAG-1427	CAG-1427 sp000436075
MGS.65_1	Illeum	Bacteria	Bacteroidota	Bacteroidia	Bacteroidaceae	Paraprevotella	Paraprevotella clara
MGS.65_2	Illeum	Bacteria	Bacteroidota	Bacteroidia	Bacteroidaceae	Paraprevotella	Paraprevotella clara
MGS.65_3	Illeum	Bacteria	Bacteroidota	Bacteroidia	Bacteroidaceae	Paraprevotella	Paraprevotella clara
MGS.65_4	Illeum	Bacteria	Bacteroidota	Bacteroidia	Bacteroidaceae	Paraprevotella	Paraprevotella clara
MGS.65_5	Illeum	Bacteria	Bacteroidota	Bacteroidia	Bacteroidaceae	Paraprevotella	Paraprevotella clara
MGS.66_1	Illeum	Bacteria	Patescibacteria	Saccharimonadia	UBA10027	SDRW01	SDRW01 sp007845485
MGS.66_10	Illeum	Bacteria	Patescibacteria	Saccharimonadia	UBA10027	SDRW01	SDRW01 sp007845485
MGS.66_14	Illeum	Bacteria	Patescibacteria	Saccharimonadia	UBA10027	SDRW01	SDRW01 sp007845485
MGS.66_29	Illeum	Bacteria	Patescibacteria	Saccharimonadia	UBA10027	SDRW01	SDRW01 sp007845485
MGS.66_32	Illeum	Bacteria	Patescibacteria	Saccharimonadia	UBA10027	SDRW01	SDRW01 sp007845485
MGS.66_33	Illeum	Bacteria	Patescibacteria	Saccharimonadia	UBA10027	SDRW01	SDRW01 sp007845485
MGS.67_1	Illeum	Bacteria	Patescibacteria	Saccharimonadia	Nanogingivalaceae	Nanogingivalis	Nanogingivalis gingivitcus
MGS.68_10	Illeum	Bacteria	Patescibacteria	Saccharimonadia	Nanogingivalaceae	Nanogingivalis	Nanogingivalis sp015257795
MGS.68_11	Illeum	Bacteria	Patescibacteria	Saccharimonadia	Nanogingivalaceae	Nanogingivalis	Nanogingivalis sp015257795
MGS.68_2	Illeum	Bacteria	Patescibacteria	Saccharimonadia	Nanogingivalaceae	Nanogingivalis	Nanogingivalis sp015257795
MGS.68_7	Illeum	Bacteria	Patescibacteria	Saccharimonadia	Nanogingivalaceae	Nanogingivalis	Nanogingivalis sp015257795
MGS.68_9	Illeum	Bacteria	Patescibacteria	Saccharimonadia	Nanogingivalaceae	Nanogingivalis	Nanogingivalis sp015257795
MGS.69_10	Illeum	Bacteria	Patescibacteria	Saccharimonadia	Nanosyncoccaceae	Nanosyncoccus	?
MGS.69_4	Illeum	Bacteria	Patescibacteria	Saccharimonadia	Nanosyncoccaceae	Nanosyncoccus	?
MGS.69_5	Illeum	Bacteria	Patescibacteria	Saccharimonadia	Nanosyncoccaceae	Nanosyncoccus	?
MGS.69_6	Illeum	Bacteria	Patescibacteria	Saccharimonadia	Nanosyncoccaceae	Nanosyncoccus	?
MGS.69_7	Illeum	Bacteria	Patescibacteria	Saccharimonadia	Nanosyncoccaceae	Nanosyncoccus	?
MGS.69_8	Illeum	Bacteria	Patescibacteria	Saccharimonadia	Nanosyncoccaceae	Nanosyncoccus	?
MGS.69_9	Illeum	Bacteria	Patescibacteria	Saccharimonadia	Nanosyncoccaceae	Nanosyncoccus	?
MGS.7_1	Illeum	Bacteria	Proteobacteria	Gammaproteobacteria	Burkholderiaceae	Sutterella	Sutterella wadsworthensis_A
MGS.7_2	Illeum	Bacteria	Proteobacteria	Gammaproteobacteria	Burkholderiaceae	Sutterella	Sutterella wadsworthensis_A
MGS.70_1	Illeum	Bacteria	Patescibacteria	Saccharimonadia	Nanosyncoccaceae	Nanosyncoccus	?
MGS.70_2	Illeum	Bacteria	Patescibacteria	Saccharimonadia	Nanosyncoccaceae	Nanosyncoccus	?
MGS.70_4	Illeum	Bacteria	Patescibacteria	Saccharimonadia	Nanosyncoccaceae	Nanosyncoccus	?
MGS.71_1	Illeum	Bacteria	Firmicutes_A	Clostridia	Lachnospiraceae	Ruminococcus_B	Ruminococcus_B gnavus
MGS.71_2	Illeum	Bacteria	Firmicutes_A	Clostridia	Lachnospiraceae	Ruminococcus_B	Ruminococcus_B gnavus
MGS.71_3	Illeum	Bacteria	Firmicutes_A	Clostridia	Lachnospiraceae	Ruminococcus_B	Ruminococcus_B gnavus
MGS.71_4	Illeum	Bacteria	Firmicutes_A	Clostridia	Lachnospiraceae	Ruminococcus_B	Ruminococcus_B gnavus
MGS.71_5	Illeum	Bacteria	Firmicutes_A	Clostridia	Lachnospiraceae	Ruminococcus_B	Ruminococcus_B gnavus
MGS.71_6	Illeum	Bacteria	Firmicutes_A	Clostridia	Lachnospiraceae	Ruminococcus_B	Ruminococcus_B gnavus
MGS.71_7	Illeum	Bacteria	Firmicutes_A	Clostridia	Lachnospiraceae	Ruminococcus_B	Ruminococcus_B gnavus
MGS.72_1	Illeum	Bacteria	Firmicutes_C	Negativicutes	Megasphaeraceae	Anaeroglobus	Anaeroglobus micronuciformis
MGS.72_25	Illeum	Bacteria	Firmicutes_C	Negativicutes	Megasphaeraceae	Anaeroglobus	Anaeroglobus micronuciformis
MGS.72_7	Illeum	Bacteria	Firmicutes_C	Negativicutes	Megasphaeraceae	Anaeroglobus	Anaeroglobus micronuciformis
MGS.75_1	Illeum	Bacteria	Firmicutes_A	Clostridia	Anaerovoracaceae	Hornefia	Hornefia nodata
MGS.75_10	Illeum	Bacteria	Firmicutes_A	Clostridia	Anaerovoracaceae	Hornefia	Hornefia nodata
MGS.75_11	Illeum	Bacteria	Firmicutes_A	Clostridia	Anaerovoracaceae	Hornefia	Hornefia nodata
MGS.75_12	Illeum	Bacteria	Firmicutes_A	Clostridia	Anaerovoracaceae	Hornefia	Hornefia nodata
MGS.75_13	Illeum	Bacteria	Firmicutes_A	Clostridia	Anaerovoracaceae	Hornefia	Hornefia nodata
MGS.75_2	Illeum	Bacteria	Firmicutes_A	Clostridia	Anaerovoracaceae	Hornefia	Hornefia nodata
MGS.75_3	Illeum	Bacteria	Firmicutes_A	Clostridia	Anaerovoracaceae	Hornefia	Hornefia nodata
MGS.75_4	Illeum	Bacteria	Firmicutes_A	Clostridia	Anaerovoracaceae	Hornefia	Hornefia nodata
MGS.75_5	Illeum	Bacteria	Firmicutes_A	Clostridia	Anaerovoracaceae	Hornefia	Hornefia nodata
MGS.75_6	Illeum	Bacteria	Firmicutes_A	Clostridia	Anaerovoracaceae	Hornefia	Hornefia nodata
MGS.75_8	Illeum	Bacteria	Firmicutes_A	Clostridia	Anaerovoracaceae	Hornefia	Hornefia nodata
MGS.75_9	Illeum	Bacteria	Firmicutes_A	Clostridia	Anaerovoracaceae	Hornefia	Hornefia nodata
MGS.77_1	Illeum	Bacteria	Firmicutes_A	Clostridia	Lachnospiraceae	Blautia	Blautia stercoris
MGS.77_2	Illeum	Bacteria	Firmicutes_A	Clostridia	Lachnospiraceae	Blautia	Blautia stercoris
MGS.79_1	Illeum	Bacteria	Firmicutes_C	Negativicutes	Acidaminococcaceae	Phascolarctobacterium	Phascolarctobacterium faecium
MGS.79_2	Illeum	Bacteria	Firmicutes_C	Negativicutes	Acidaminococcaceae	Phascolarctobacterium	Phascolarctobacterium faecium
MGS.79_5	Illeum	Bacteria	Firmicutes_C	Negativicutes	Acidaminococcaceae	Phascolarctobacterium	Phascolarctobacterium faecium
MGS.8_1	Illeum	Bacteria	Firmicutes	Bacilli	Staphylococcaceae	Staphylococcus	Staphylococcus aureus
MGS.8_10	Illeum	Bacteria	Firmicutes	Bacilli	Staphylococcaceae	Staphylococcus	Staphylococcus aureus
MGS.8_11	Illeum	Bacteria	Firmicutes	Bacilli	Staphylococcaceae	Staphylococcus	Staphylococcus aureus
MGS.8_12	Illeum	Bacteria	Firmicutes	Bacilli	Staphylococcaceae	Staphylococcus	Staphylococcus aureus
MGS.8_13	Illeum	Bacteria	Firmicutes	Bacilli	Staphylococcaceae	Staphylococcus	Staphylococcus aureus
MGS.8_14	Illeum	Bacteria	Firmicutes	Bacilli	Staphylococcaceae	Staphylococcus	Staphylococcus aureus
MGS.8_15	Illeum	Bacteria	Firmicutes	Bacilli	Staphylococcaceae	Staphylococcus	Staphylococcus aureus
MGS.8_16	Illeum	Bacteria	Firmicutes	Bacilli	Staphylococcaceae	Staphylococcus	Staphylococcus aureus
MGS.8_17	Illeum	Bacteria	Firmicutes	Bacilli	Staphylococcaceae	Staphylococcus	Staphylococcus aureus
MGS.8_18	Illeum	Bacteria	Firmicutes	Bacilli	Staphylococcaceae	Staphylococcus	Staphylococcus aureus
MGS.8_19	Illeum	Bacteria	Firmicutes	Bacilli	Staphylococcaceae	Staphylococcus	Staphylococcus aureus
MGS.8_2	Illeum	Bacteria	Firmicutes	Bacilli	Staphylococcaceae	Staphylococcus	Staphylococcus aureus
MGS.8_20	Illeum	Bacteria	Firmicutes	Bacilli	Staphylococcaceae	Staphylococcus	Staphylococcus aureus
MGS.8_21	Illeum	Bacteria	Firmicutes	Bacilli	Staphylococcaceae	Staphylococcus	Staphylococcus aureus
MGS.8_22	Illeum	Bacteria	Firmicutes	Bacilli	Staphylococcaceae	Staphylococcus	Staphylococcus aureus
MGS.8_23	Illeum	Bacteria	Firmicutes	Bacilli	Staphylococcaceae	Staphylococcus	Staphylococcus aureus
MGS.8_24	Illeum	Bacteria	Firmicutes	Bacilli	Staphylococcaceae	Staphylococcus	Staphylococcus aureus
MGS.8_25	Illeum	Bacteria	Firmicutes	Bacilli	Staphylococcaceae	Staphylococcus	Staphylococcus aureus
MGS.8_26	Illeum	Bacteria	Firmicutes	Bacilli	Staphylococcaceae	Staphylococcus	Staphylococcus aureus
MGS.8_27	Illeum	Bacteria	Firmicutes	Bacilli	Staphylococcaceae	Staphylococcus	Staphylococcus aureus
MGS.8_29	Illeum	Bacteria	Firmicutes	Bacilli	Staphylococcaceae	Staphylococcus	Staphylococcus aureus
MGS.8_3	Illeum	Bacteria	Firmicutes	Bacilli	Staphylococcaceae	Staphylococcus	Staphylococcus aureus
MGS.8_30	Illeum	Bacteria	Firmicutes	Bacilli	Staphylococcaceae	Staphylococcus	Staphylococcus aureus
MGS.8_31	Illeum	Bacteria	Firmicutes	Bacilli	Staphylococcaceae	Staphylococcus	Staphylococcus aureus
MGS.8_32	Illeum	Bacteria	Firmicutes	Bacilli	Staphylococcaceae	Staphylococcus	Staphylococcus aureus
MGS.8_4	Illeum	Bacteria	Firmicutes	Bacilli	Staphylococcaceae	Staphylococcus	Staphylococcus aureus
MGS.8_5	Illeum	Bacteria	Firmicutes	Bacilli	Staphylococcaceae	Staphylococcus	Staphylococcus aureus
MGS.8_6	Illeum	Bacteria	Firmicutes	Bacilli	Staphylococcaceae	Staphylococcus	Staphylococcus aureus
MGS.8_7	Illeum	Bacteria	Firmicutes	Bacilli	Staphylococcaceae	Staphylococcus	Staphylococcus aureus
MGS.8_8	Illeum	Bacteria	Firmicutes	Bacilli	Staphylococcaceae	Staphylococcus	Staphylococcus aureus
MGS.8_9	Illeum	Bacteria	Firmicutes	Bacilli	Staphylococcaceae	Staphylococcus	Staphylococcus aureus
MGS.80_13	Illeum	Bacteria	Firmicutes_A	Clostridia	Peptostreptococcaceae	Romboutsia	Romboutsia timonensis
MGS.80_18	Illeum	Bacteria	Firmicutes_A	Clostridia	Peptostreptococcaceae	Romboutsia	Romboutsia timonensis
MGS.80_19	Illeum	Bacteria	Firmicutes_A	Clostridia	Peptostreptococcaceae	Romboutsia	Romboutsia timonensis
MGS.80_22	Illeum	Bacteria	Firmicutes_A	Clostridia	Peptostreptococcaceae	Romboutsia	Romboutsia timonensis
MGS.80_24	Illeum	Bacteria	Firmicutes_A	Clostridia	Peptostreptococcaceae	Romboutsia	Romboutsia timonensis
MGS.80_4	Illeum	Bacteria	Firmicutes_A	Clostridia	Peptostreptococcaceae	Romboutsia	Romboutsia timonensis
MGS.80_6	Illeum	Bacteria	Firmicutes_A	Clostridia	Peptostreptococcaceae	Romboutsia	Romboutsia timonensis
MGS.80_7	Illeum	Bacteria	Firmicutes_A	Clostridia	Peptostreptococcaceae	Romboutsia	Romboutsia timonensis
MGS.80_8	Illeum	Bacteria	Firmicutes_A	Clostridia	Peptostreptococcaceae	Romboutsia	Romboutsia timonensis
MGS.81_1	Illeum	Bacteria	Actinobacteriota	Actinomycetia	Actinomycetaceae	Actinomyces	Actinomyces graevenitzii
MGS.81_11	Illeum	Bacteria	Actinobacteriota	Actinomycetia	Actinomycetaceae	Actinomyces	Actinomyces graevenitzii
MGS.81_13	Illeum	Bacteria	Actinobacteriota	Actinomycetia	Actinomycetaceae	Actinomyces	Actinomyces graevenitzii
MGS.81_14	Illeum	Bacteria	Actinobacteriota	Actinomycetia	Actinomycetaceae	Actinomyces	Actinomyces graevenitzii
MGS.81_17	Illeum	Bacteria	Actinobacteriota	Actinomycetia	Actinomycetaceae	Actinomyces	Actinomyces graevenitzii
MGS.81_18	Illeum	Bacteria	Actinobacteriota	Actinomycetia	Actinomycetaceae	Actinomyces	Actinomyces graevenitzii
MGS.81_19	Illeum	Bacteria	Actinobacteriota	Actinomycetia	Actinomycetaceae	Actinomyces	Actinomyces graevenitzii
MGS.81_22	Illeum	Bacteria	Actinobacteriota	Actinomycetia	Actinomycetaceae	Actinomyces	Actinomyces graevenitzii
MGS.81_26	Illeum	Bacteria	Actinobacteriota	Actinomycetia	Actinomycetaceae	Actinomyces	Actinomyces graevenitzii
MGS.81_29	Illeum	Bacteria	Actinobacteriota	Actinomycetia	Actinomycetaceae	Actinomyces	Actinomyces graevenitzii
MGS.81_3	Illeum	Bacteria	Actinobacteriota	Actinomycetia	Actinomycetaceae	Actinomyces	Actinomyces graevenitzii
MGS.81_30	Illeum	Bacteria	Actinobacteriota	Actinomycetia	Actinomycetaceae	Actinomyces	Actinomyces graevenitzii
MGS.81_31	Illeum	Bacteria	Actinobacteriota	Actinomycetia	Actinomycetaceae	Actinomyces	Actinomyces graevenitzii
MGS.81_32	Illeum	Bacteria	Actinobacteriota	Actinomycetia	Actinomycetaceae	Actinomyces	Actinomyces graevenitzii
MGS.81_33	Illeum	Bacteria	Actinobacteriota	Actinomycetia	Actinomycetaceae	Actinomyces	Actinomyces graevenitzii
MGS.81_4	Illeum	Bacteria	Actinobacteriota	Actinomycetia	Actinomycetaceae	Actinomyces	Actinomyces graevenitzii
MGS.81_5	Illeum	Bacteria	Actinobacteriota	Actinomycetia	Actinomycetaceae	Actinomyces	Actinomyces graevenitzii
MGS.81_6	Illeum	Bacteria	Actinobacteriota	Actinomycetia	Actinomycetaceae	Actinomyces	Actinomyces graevenitzii
MGS.82_1	Illeum	Bacteria	Firmicutes	Bacilli	Streptococcaceae	Lactococcus_A	Lactococcus_A plantarum
MGS.82_2	Illeum	Bacteria	Firmicutes	Bacilli	Streptococcaceae	Lactococcus_A	Lactococcus_A plantarum
MGS.82_3	Illeum	Bacteria	Firmicutes	Bacilli	Streptococcaceae	Lactococcus_A	Lactococcus_A plantarum
MGS.85_1	Illeum	Bacteria	Firmicutes_A	Clostridia	Acutalibacteraceae	Eubacterium_R	Eubacterium_R sp000434995
MGS.85_2	Illeum	Bacteria	Firmicutes_A	Clostridia	Acutalibacteraceae	Eubacterium_R	Eubacterium_R sp000434995
MGS.85_4	Illeum	Bacteria	Firmicutes_A	Clostridia	Acutalibacteraceae	Eubacterium_R	Eubacterium_R sp000434995
MGS.85_5	Illeum	Bacteria	Firmicutes_A	Clostridia	Acutalibacteraceae	Eubacterium_R	Eubacterium_R sp000434995
MGS.85_6	Illeum	Bacteria	Firmicutes_A	Clostridia	Acutalibacteraceae	Eubacterium_R	Eubacterium_R sp000434995
MGS.86_1	Illeum	Bacteria	Firmicutes_A	Clostridia	Peptostreptococcaceae	Paraclostridium	Paraclostridium sordellii
MGS.87_1	Illeum	Bacteria	Actinobacteriota	Actinomycetia	Propionibacteriaceae	Arachnia	Arachnia rubra
MGS.87_14	Illeum	Bacteria	Actinobacteriota	Actinomycetia	Propionibacteriaceae	Arachnia	Arachnia rubra
MGS.87_15	Illeum	Bacteria	Actinobacteriota	Actinomycetia	Propionibacteriaceae	Arachnia	Arachnia rubra
MGS.87_17	Illeum	Bacteria	Actinobacteriota	Actinomycetia	Propionibacteriaceae	Arachnia	Arachnia rubra
MGS.87_18	Illeum	Bacteria	Actinobacteriota	Actinomycetia	Propionibacteriaceae	Arachnia	Arachnia rubra
MGS.87_2	Illeum	Bacteria	Actinobacteriota	Actinomycetia	Propionibacteriaceae	Arachnia	Arachnia rubra
MGS.87_4	Illeum	Bacteria	Actinobacteriota	Actinomycetia	Propionibacteriaceae	Arachnia	Arachnia rubra
MGS.87_6	Illeum	Bacteria	Actinobacteriota	Actinomycetia	Propionibacteriaceae	Arachnia	Arachnia rubra
MGS.88_1	Illeum	Bacteria	Firmicutes_A	Clostridia	Oscillospiraceae	Faecousia	Faecousia sp900547405
MGS.89_10	Illeum	Bacteria	Firmicutes_A	Clostridia	Lachnospiraceae	Agathobacter	Agathobacter faecis
MGS.89_11	Illeum	Bacteria	Firmicutes_A	Clostridia	Lachnospiraceae	Agathobacter	Agathobacter faecis
MGS.89_12	Illeum	Bacteria	Firmicutes_A	Clostridia	Lachnospiraceae	Agathobacter	Agathobacter faecis
MGS.89_2	Illeum	Bacteria	Firmicutes_A	Clostridia	Lachnospiraceae	Agathobacter	Agathobacter faecis
MGS.89_3	Illeum	Bacteria	Firmicutes_A	Clostridia	Lachnospiraceae	Agathobacter	Agathobacter faecis
MGS.89_4	Illeum	Bacteria	Firmicutes_A	Clostridia	Lachnospiraceae	Agathobacter	Agathobacter faecis
MGS.89_5	Illeum	Bacteria	Firmicutes_A	Clostridia	Lachnospiraceae	Agathobacter	Agathobacter faecis
MGS.89_6	Illeum	Bacteria	Firmicutes_A	Clostridia	Lachnospiraceae	Agathobacter	Agathobacter faecis
MGS.89_8	Illeum	Bacteria	Firmicutes_A	Clostridia	Lachnospiraceae	Agathobacter	Agathobacter faecis
MGS.89_9	Illeum	Bacteria	Firmicutes_A	Clostridia	Lachnospiraceae	Agathobacter	Agathobacter faecis
MGS.9_9	Illeum	Bacteria	Actinobacteriota	Actinomycetia	Mycobacteriaceae	Corynebacterium	Corynebacterium matruchotii
MGS.90_1	Illeum	Bacteria	Firmicutes	Bacilli	Turicibacteraceae	Turicibacter	Turicibacter sp001543345
MGS.90_2	Illeum	Bacteria	Firmicutes	Bacilli	Turicibacteraceae	Turicibacter	Turicibacter sp001543345
MGS.90_3	Illeum	Bacteria	Firmicutes	Bacilli	Turicibacteraceae	Turicibacter	Turicibacter sp001543345
MGS.90_4	Illeum	Bacteria	Firmicutes	Bacilli	Turicibacteraceae	Turicibacter	Turicibacter sp001543345
MGS.90_5	Illeum	Bacteria	Firmicutes	Bacilli	Turicibacteraceae	Turicibacter	Turicibacter sp001543345
MGS.94_1	Illeum	Bacteria	Firmicutes_A	Clostridia	Lachnospiraceae	Coprococcus	Coprococcus eutactus_A
MGS.94_3	Illeum	Bacteria	Firmicutes_A	Clostridia	Lachnospiraceae	Coprococcus	Coprococcus eutactus_A
MGS.95_1	Illeum	Bacteria	Firmicutes_A	Clostridia	Lachnospiraceae	Marvinbryantia	Marvinbryantia sp014385005
MGS.96_1	Illeum	Bacteria	Firmicutes_A	Clostridia	Butyricicoccaceae	Agathobaculum	Agathobaculum sp003481705
MGS.98_1	Illeum	Bacteria	Actinobacteriota	Actinomycetia	Bifidobacteriaceae	Alloscardovia	Alloscardovia omnicolens
MGS.98_2	Illeum	Bacteria	Actinobacteriota	Actinomycetia	Bifidobacteriaceae	Alloscardovia	Alloscardovia omnicolens
MGS.98_3	Illeum	Bacteria	Actinobacteriota	Actinomycetia	Bifidobacteriaceae	Alloscardovia	Alloscardovia omnicolens
MGS.98_4	Illeum	Bacteria	Actinobacteriota	Actinomycetia	Bifidobacteriaceae	Alloscardovia	Alloscardovia omnicolens
MGS.98_5	Illeum	Bacteria	Actinobacteriota	Actinomycetia	Bifidobacteriaceae	Alloscardovia	Alloscardovia omnicolens
MGS.98_6	Illeum	Bacteria	Actinobacteriota	Actinomycetia	Bifidobacteriaceae	Alloscardovia	Alloscardovia omnicolens
MGS.98_7	Illeum	Bacteria	Actinobacteriota	Actinomycetia	Bifidobacteriaceae	Alloscardovia	Alloscardovia omnicolens
MGS.103_11	Shared	Bacteria	Firmicutes_A	Clostridia	Lachnospiraceae	Stomatobaculum	Stomatobaculum longum_A
MGS.103_7	Shared	Bacteria	Firmicutes_A	Clostridia	Lachnospiraceae	Stomatobaculum	Stomatobaculum longum_A
MGS.103_8	Shared	Bacteria	Firmicutes_A	Clostridia	Lachnospiraceae	Stomatobaculum	Stomatobaculum longum_A
MGS.110_1	Shared	Bacteria	Firmicutes_A	Clostridia	Anaerovoracaceae	Eubacterium_N	Eubacterium_N saphenum
MGS.111_1	Shared	Bacteria	Bacteroidota	Bacteroidia	Bacteroidaceae	Prevotella	Prevotella histicola
MGS.119_10	Shared	Bacteria	Firmicutes	Bacilli	Aerococcaceae	Granulicatella	?
MGS.119_18	Shared	Bacteria	Firmicutes	Bacilli	Aerococcaceae	Granulicatella	?
MGS.120_26	Shared	Bacteria	Firmicutes_A	Clostridia	Peptoniphilaceae	Parvimonas	Parvimonas sp015257355
MGS.120_4	Shared	Bacteria	Firmicutes_A	Clostridia	Peptoniphilaceae	Parvimonas	Parvimonas sp015257355
MGS.127_7	Shared	Bacteria	Firmicutes_A	Clostridia	Peptoniphilaceae	Parvimonas	Parvimonas micra
MGS.127_8	Shared	Bacteria	Firmicutes_A	Clostridia	Peptoniphilaceae	Parvimonas	Parvimonas micra
MGS.127_9	Shared	Bacteria	Firmicutes_A	Clostridia	Peptoniphilaceae	Parvimonas	Parvimonas micra
MGS.132_2	Shared	Bacteria	Firmicutes_A	Clostridia	CAG-508	CAG-793	CAG-793 sp013333035
MGS.137_15	Shared	Bacteria	Proteobacteria	Gammaproteobacteria	Pasteurellaceae	Haemophilus_A	Haemophilus_A parahaemolyticus
MGS.14_14	Shared	Bacteria	Actinobacteriota	Actinomycetia	Mycobacteriaceae	Corynebacterium	Corynebacterium durum
MGS.14_3	Shared	Bacteria	Actinobacteriota	Actinomycetia	Mycobacteriaceae	Corynebacterium	Corynebacterium durum
MGS.14_4	Shared	Bacteria	Actinobacteriota	Actinomycetia	Mycobacteriaceae	Corynebacterium	Corynebacterium durum
MGS.151_1	Shared	Bacteria	Proteobacteria	Gammaproteobacteria	Pasteurellaceae	Haemophilus_A	Haemophilus_A sputorum
MGS.151_2	Shared	Bacteria	Proteobacteria	Gammaproteobacteria	Pasteurellaceae	Haemophilus_A	Haemophilus_A sputorum
MGS.162_3	Shared	Bacteria	Actinobacteriota	Actinomycetia	Actinomycetaceae	Actinomyces	Actinomyces sp000220835
MGS.163_1	Shared	Bacteria	Firmicutes_A	Clostridia	Lachnospiraceae	Oribacterium	?
MGS.163_11	Shared	Bacteria	Firmicutes_A	Clostridia	Lachnospiraceae	Oribacterium	?
MGS.163_12	Shared	Bacteria	Firmicutes_A	Clostridia	Lachnospiraceae	Oribacterium	?
MGS.163_5	Shared	Bacteria	Firmicutes_A	Clostridia	Lachnospiraceae	Oribacterium	?
MGS.170_1	Shared	Bacteria	Firmicutes	Bacilli	Gemellaceae	Gemella	Gemella sanguinis
MGS.170_16	Shared	Bacteria	Firmicutes	Bacilli	Gemellaceae	Gemella	Gemella sanguinis
MGS.170_17	Shared	Bacteria	Firmicutes	Bacilli	Gemellaceae	Gemella	Gemella sanguinis
MGS.170_23	Shared	Bacteria	Firmicutes	Bacilli	Gemellaceae	Gemella	Gemella sanguinis
MGS.170_8	Shared	Bacteria	Firmicutes	Bacilli	Gemellaceae	Gemella	Gemella sanguinis
MGS.173_1	Shared	Bacteria	Fusobacteriota	Fusobacteriia	Leptotrichiaceae	JABCPH02	JABCPH02 sp013333235
MGS.173_2	Shared	Bacteria	Fusobacteriota	Fusobacteriia	Leptotrichiaceae	JABCPH02	JABCPH02 sp013333235
MGS.173_8	Shared	Bacteria	Fusobacteriota	Fusobacteriia	Leptotrichiaceae	JABCPH02	JABCPH02 sp013333235
MGS.175_17	Shared	Bacteria	Fusobacteriota	Fusobacteriia	Leptotrichiaceae	Leptotrichia	Leptotrichia wadei_A
MGS.175_22	Shared	Bacteria	Fusobacteriota	Fusobacteriia	Leptotrichiaceae	Leptotrichia	Leptotrichia wadei_A
MGS.175_31	Shared	Bacteria	Fusobacteriota	Fusobacteriia	Leptotrichiaceae	Leptotrichia	Leptotrichia wadei_A
MGS.175_8	Shared	Bacteria	Fusobacteriota	Fusobacteriia	Leptotrichiaceae	Leptotrichia	Leptotrichia wadei_A
MGS.18_1	Shared	Bacteria	Firmicutes_A	Clostridia	Lachnospiraceae	Catonella	Catonella massiliensis
MGS.18_10	Shared	Bacteria	Firmicutes_A	Clostridia	Lachnospiraceae	Catonella	Catonella massiliensis
MGS.18_12	Shared	Bacteria	Firmicutes_A	Clostridia	Lachnospiraceae	Catonella	Catonella massiliensis
MGS.18_2	Shared	Bacteria	Firmicutes_A	Clostridia	Lachnospiraceae	Catonella	Catonella massiliensis
MGS.183_1	Shared	Bacteria	Proteobacteria	Gammaproteobacteria	Burkholderiaceae	Lautropia	Lautropia dentalis
MGS.190_18	Shared	Bacteria	Actinobacteriota	Actinomycetia	Micrococcaceae	Rothia	Rothia aeria
MGS.190_21	Shared	Bacteria	Actinobacteriota	Actinomycetia	Micrococcaceae	Rothia	Rothia aeria
MGS.190_4	Shared	Bacteria	Actinobacteriota	Actinomycetia	Micrococcaceae	Rothia	Rothia aeria
MGS.201_5	Shared	Bacteria	Bacteroidota	Bacteroidia	Bacteroidaceae	Prevotella	Prevotella nigrescens
MGS.207_28	Shared	Bacteria	Firmicutes_A	Clostridia	Lachnospiraceae	Lachnoanaerobaculum	Lachnoanaerobaculum orale
MGS.207_33	Shared	Bacteria	Firmicutes_A	Clostridia	Lachnospiraceae	Lachnoanaerobaculum	Lachnoanaerobaculum orale
MGS.207_9	Shared	Bacteria	Firmicutes_A	Clostridia	Lachnospiraceae	Lachnoanaerobaculum	Lachnoanaerobaculum orale
MGS.216_4	Shared	Bacteria	Bacteroidota	Bacteroidia	Weeksellaceae	JABCPE02	JABCPE02 sp013333255
MGS.23_3	Shared	Bacteria	Actinobacteriota	Coriobacteriia	Atopobiaceae	Lancefieldella	Lancefieldella rimae
MGS.238_2	Shared	Bacteria	Firmicutes	Bacilli	Gemellaceae	Gemella	Gemella morbillorum
MGS.238_3	Shared	Bacteria	Firmicutes	Bacilli	Gemellaceae	Gemella	Gemella morbillorum
MGS.239_14	Shared	Bacteria	Proteobacteria	Gammaproteobacteria	Neisseriaceae	Neisseria	Neisseria elongata
MGS.239_8	Shared	Bacteria	Proteobacteria	Gammaproteobacteria	Neisseriaceae	Neisseria	Neisseria elongata
MGS.241_1	Shared	Bacteria	Proteobacteria	Gammaproteobacteria	Pasteurellaceae	Aggregatibacter	Aggregatibacter segnis
MGS.241_21	Shared	Bacteria	Proteobacteria	Gammaproteobacteria	Pasteurellaceae	Aggregatibacter	Aggregatibacter segnis
MGS.245_12	Shared	Bacteria	Firmicutes_A	Clostridia	Peptostreptococcaceae	Peptostreptococcus	Peptostreptococcus stomatis
MGS.25_1	Shared	Bacteria	Actinobacteriota	Actinomycetia	Micrococcaceae	Rothia	Rothia dentocariosa
MGS.25_14	Shared	Bacteria	Actinobacteriota	Actinomycetia	Micrococcaceae	Rothia	Rothia dentocariosa
MGS.25_17	Shared	Bacteria	Actinobacteriota	Actinomycetia	Micrococcaceae	Rothia	Rothia dentocariosa
MGS.25_19	Shared	Bacteria	Actinobacteriota	Actinomycetia	Micrococcaceae	Rothia	Rothia dentocariosa
MGS.25_20	Shared	Bacteria	Actinobacteriota	Actinomycetia	Micrococcaceae	Rothia	Rothia dentocariosa
MGS.250_5	Shared	Bacteria	Bacteroidota	Bacteroidia	Bacteroidaceae	Alloprevotella	Alloprevotella tannerae_B
MGS.261_18	Shared	Bacteria	Actinobacteriota	Actinomycetia	Actinomycetaceae	Pauljensenia	Pauljensenia sp000758755
MGS.261_20	Shared	Bacteria	Actinobacteriota	Actinomycetia	Actinomycetaceae	Pauljensenia	Pauljensenia sp000758755
MGS.261_4	Shared	Bacteria	Actinobacteriota	Actinomycetia	Actinomycetaceae	Pauljensenia	Pauljensenia sp000758755
MGS.265_1	Shared	Bacteria	Actinobacteriota	Actinomycetia	Actinomycetaceae	Pauljensenia	Pauljensenia sp000278725
MGS.271_9	Shared	Bacteria	Actinobacteriota	Actinomycetia	Actinomycetaceae	Pauljensenia	Pauljensenia sp000308055
MGS.277_17	Shared	Bacteria	Proteobacteria	Gammaproteobacteria	Pasteurellaceae	Haemophilus	?
MGS.277_4	Shared	Bacteria	Proteobacteria	Gammaproteobacteria	Pasteurellaceae	Haemophilus	?
MGS.278_20	Shared	Bacteria	Firmicutes	Bacilli	Streptococcaceae	Streptococcus	Streptococcus sanguinis_H
MGS.278_21	Shared	Bacteria	Firmicutes	Bacilli	Streptococcaceae	Streptococcus	Streptococcus sanguinis_H
MGS.278_27	Shared	Bacteria	Firmicutes	Bacilli	Streptococcaceae	Streptococcus	Streptococcus sanguinis_H
MGS.278_5	Shared	Bacteria	Firmicutes	Bacilli	Streptococcaceae	Streptococcus	Streptococcus sanguinis_H
MGS.284_53	Shared	Bacteria	Proteobacteria	Gammaproteobacteria	Neisseriaceae	Neisseria	Neisseria sp000186165
MGS.286_10	Shared	Bacteria	Firmicutes	Bacilli	Aerococcaceae	Abiotrophia	Abiotrophia defectiva
MGS.288_2	Shared	Bacteria	Firmicutes_A	Clostridia	Lachnospiraceae	Lachnoanaerobaculum	Lachnoanaerobaculum sp000287675
MGS.289_5	Shared	Bacteria	Bacteroidota	Bacteroidia	Bacteroidaceae	Prevotella	Prevotella melaninogenica
MGS.290_3	Shared	Bacteria	Proteobacteria	Gammaproteobacteria	Pasteurellaceae	Haemophilus_A	Haemophilus_A paraphrohaemolyticus
MGS.291_7	Shared	Bacteria	Patescibacteria	JAEDAM01	X112	HOT-345	HOT-345 sp013333605
MGS.295_34	Shared	Bacteria	Firmicutes	Bacilli	Gemellaceae	Gemella	Gemella haemolysans_B
MGS.31_10	Shared	Bacteria	Firmicutes_A	Clostridia	Anaerovoracaceae	Mogibacterium	Mogibacterium diversum
MGS.31_14	Shared	Bacteria	Firmicutes_A	Clostridia	Anaerovoracaceae	Mogibacterium	Mogibacterium diversum
MGS.31_17	Shared	Bacteria	Firmicutes_A	Clostridia	Anaerovoracaceae	Mogibacterium	Mogibacterium diversum
MGS.31_4	Shared	Bacteria	Firmicutes_A	Clostridia	Anaerovoracaceae	Mogibacterium	Mogibacterium diversum
MGS.31_5	Shared	Bacteria	Firmicutes_A	Clostridia	Anaerovoracaceae	Mogibacterium	Mogibacterium diversum
MGS.47_1	Shared	Bacteria	Actinobacteriota	Actinomycetia	Actinomycetaceae	Peptidiphaga	Peptidiphaga sp000466165
MGS.47_26	Shared	Bacteria	Actinobacteriota	Actinomycetia	Actinomycetaceae	Peptidiphaga	Peptidiphaga sp000466165
MGS.47_6	Shared	Bacteria	Actinobacteriota	Actinomycetia	Actinomycetaceae	Peptidiphaga	Peptidiphaga sp000466165
MGS.50_43	Shared	Bacteria	Firmicutes_A	Clostridia	Anaerovoracaceae	Eubacterium_B	Eubacterium_B sulci
MGS.50_48	Shared	Bacteria	Firmicutes_A	Clostridia	Anaerovoracaceae	Eubacterium_B	Eubacterium_B sulci
MGS.50_51	Shared	Bacteria	Firmicutes_A	Clostridia	Anaerovoracaceae	Eubacterium_B	Eubacterium_B sulci
MGS.60_5	Shared	Bacteria	Firmicutes_A	Clostridia	Lachnospiraceae	Stomatobaculum	Stomatobaculum longum
MGS.66_19	Shared	Bacteria	Patescibacteria	Saccharimonadia	UBA10027	SDRW01	SDRW01 sp007845485
MGS.66_34	Shared	Bacteria	Patescibacteria	Saccharimonadia	UBA10027	SDRW01	SDRW01 sp007845485
MGS.68_1	Shared	Bacteria	Patescibacteria	Saccharimonadia	Nanogingivalaceae	Nanogingivalis	Nanogingivalis sp015257795
MGS.68_3	Shared	Bacteria	Patescibacteria	Saccharimonadia	Nanogingivalaceae	Nanogingivalis	Nanogingivalis sp015257795
MGS.69_1	Shared	Bacteria	Patescibacteria	Saccharimonadia	Nanosyncoccaceae	Nanosyncoccus	?
MGS.72_10	Shared	Bacteria	Firmicutes_C	Negativicutes	Megasphaeraceae	Anaeroglobus	Anaeroglobus micronuciformis
MGS.72_11	Shared	Bacteria	Firmicutes_C	Negativicutes	Megasphaeraceae	Anaeroglobus	Anaeroglobus micronuciformis
MGS.72_14	Shared	Bacteria	Firmicutes_C	Negativicutes	Megasphaeraceae	Anaeroglobus	Anaeroglobus micronuciformis
MGS.72_18	Shared	Bacteria	Firmicutes_C	Negativicutes	Megasphaeraceae	Anaeroglobus	Anaeroglobus micronuciformis
MGS.72_6	Shared	Bacteria	Firmicutes_C	Negativicutes	Megasphaeraceae	Anaeroglobus	Anaeroglobus micronuciformis
MGS.81_25	Shared	Bacteria	Actinobacteriota	Actinomycetia	Actinomycetaceae	Actinomyces	Actinomyces graevenitzii
MGS.9_11	Shared	Bacteria	Actinobacteriota	Actinomycetia	Mycobacteriaceae	Corynebacterium	Corynebacterium matruchotii
MGS.9_7	Shared	Bacteria	Actinobacteriota	Actinomycetia	Mycobacteriaceae	Corynebacterium	Corynebacterium matruchotii
